# Supplementary material
Source: MDPI journal article supplement (https://www.mdpi.com/1424-8247/14/12/1252)
Supplement: s1 [file s1]

# **Bioactive Diterpenes, Norditerpenes, and Sesquiterpenes from a Formosan Soft Coral *Cespitularia* sp.**

You-Cheng Lin <sup>1</sup>, Chi-Chien Lin <sup>2</sup>, Yi-Chia Chu <sup>2</sup>, Chung-Wei Fu <sup>3</sup>, and Jyh-Horng Sheu <sup>1,3,4,5,6,\*</sup>

<sup>1</sup> Doctoral Degree Program in Marine Biotechnology, National Sun Yat-sen University, Kaohsiung 804, Taiwan ; d045620002@nsssu.edu.tw (Y.-C. L.)

<sup>2</sup> Institute of Biomedical Science, National Chung-Hsing University, Taichung 402, Taiwan ; lincc@dragon.nchu.edu.tw (C.-C. L.); girl770409@smail.nchu.edu.tw (Y.-C. C.)

<sup>3</sup> Department of Marine Biotechnology and Resources, National Sun Yat-sen University, Kaohsiung 804, Taiwan; m095020006@nsssu.edu.tw (C.-W. F.)

<sup>4</sup> Department of Medical Research, China Medical University Hospital, China Medical University, Taichung 404, Taiwan

<sup>5</sup> Graduate Institute of Natural Products, Kaohsiung Medical University, Kaohsiung 807, Taiwan

<sup>6</sup> Frontier Center for Ocean Science and Technology, National Sun Yat-sen University, Kaohsiung 804, Taiwan

\* Correspondence: sheu@mail.nsssu.edu.tw; Tel.: +886-7-5252-000 ext. 5030



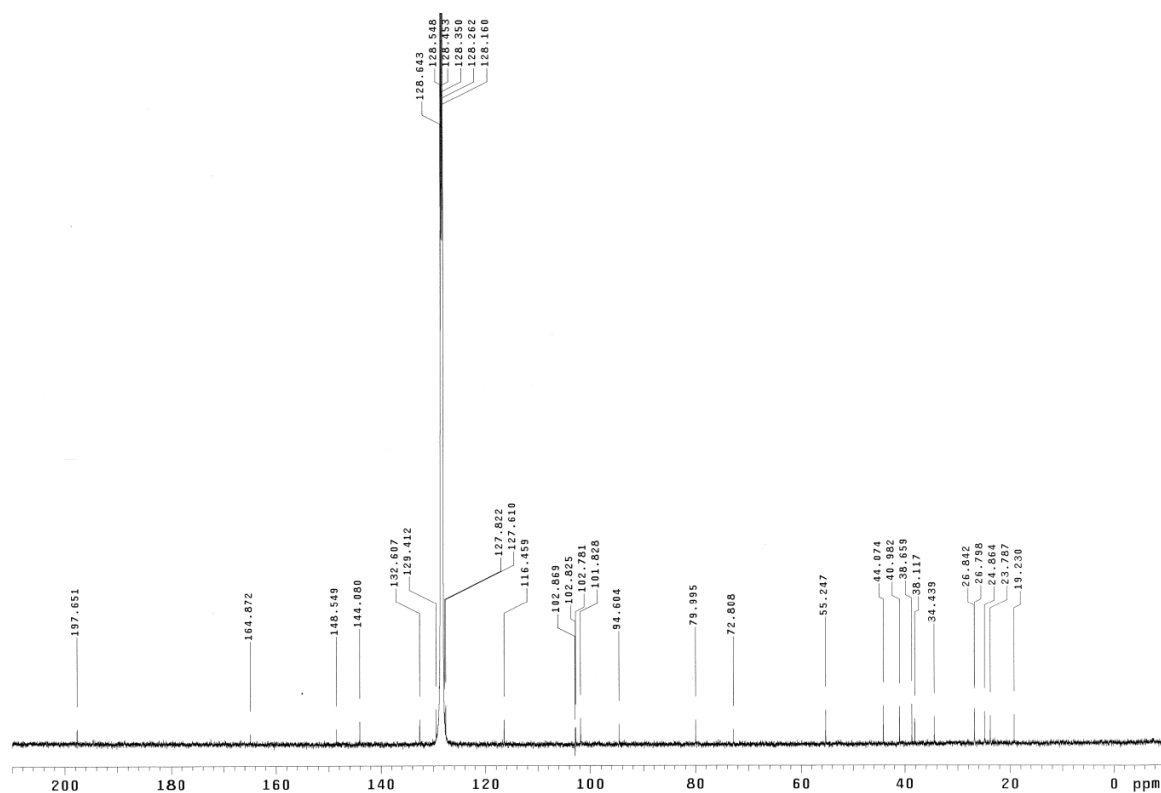

Figure S3.  $^{13}\text{C}$  NMR spectrum of **1** in  $\text{C}_6\text{D}_6$  at 125 MHz

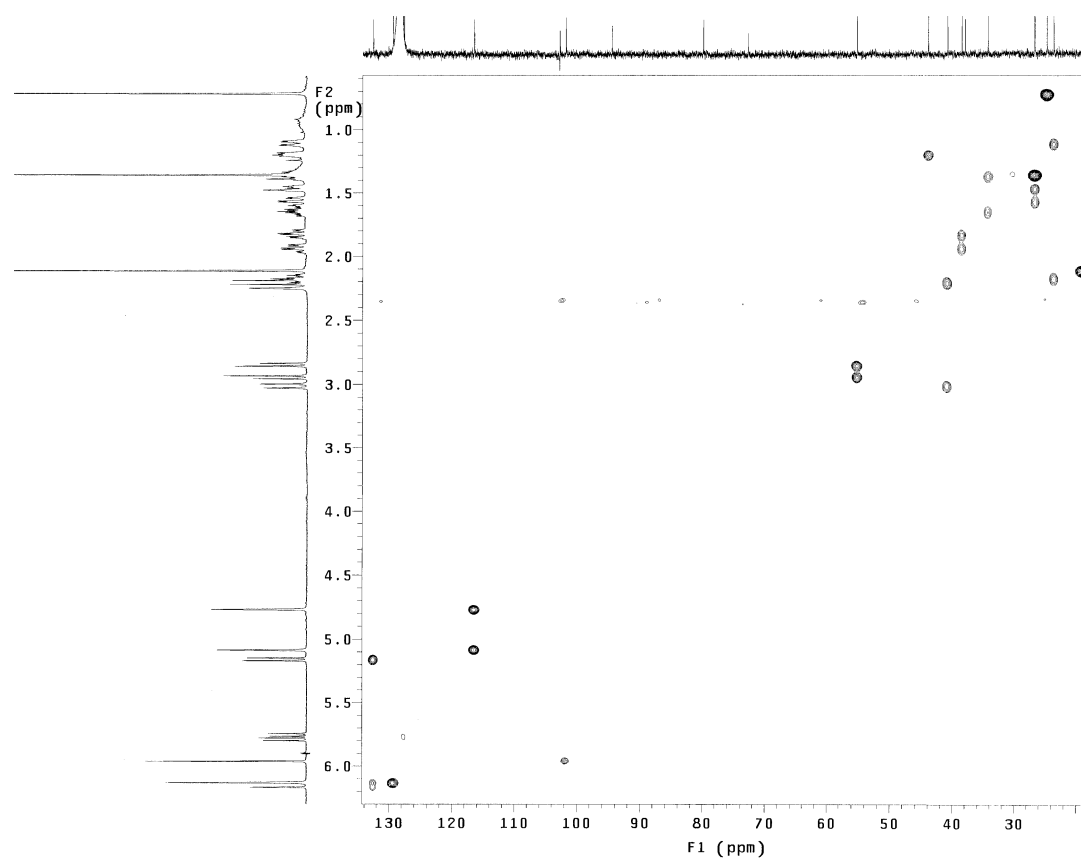

Figure S4. HSQC spectrum of **1** in  $\text{C}_6\text{D}_6$

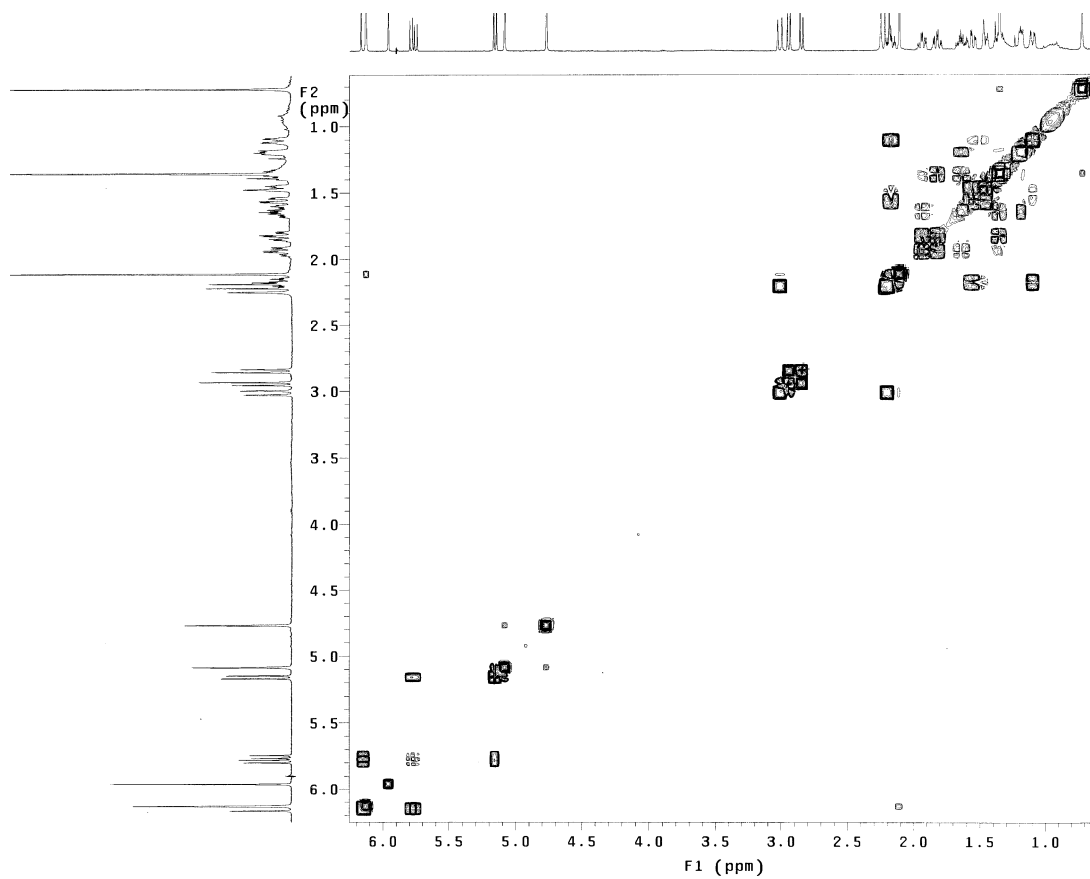

**Figure S5.** COSY spectrum of **1** in C<sub>6</sub>D<sub>6</sub>

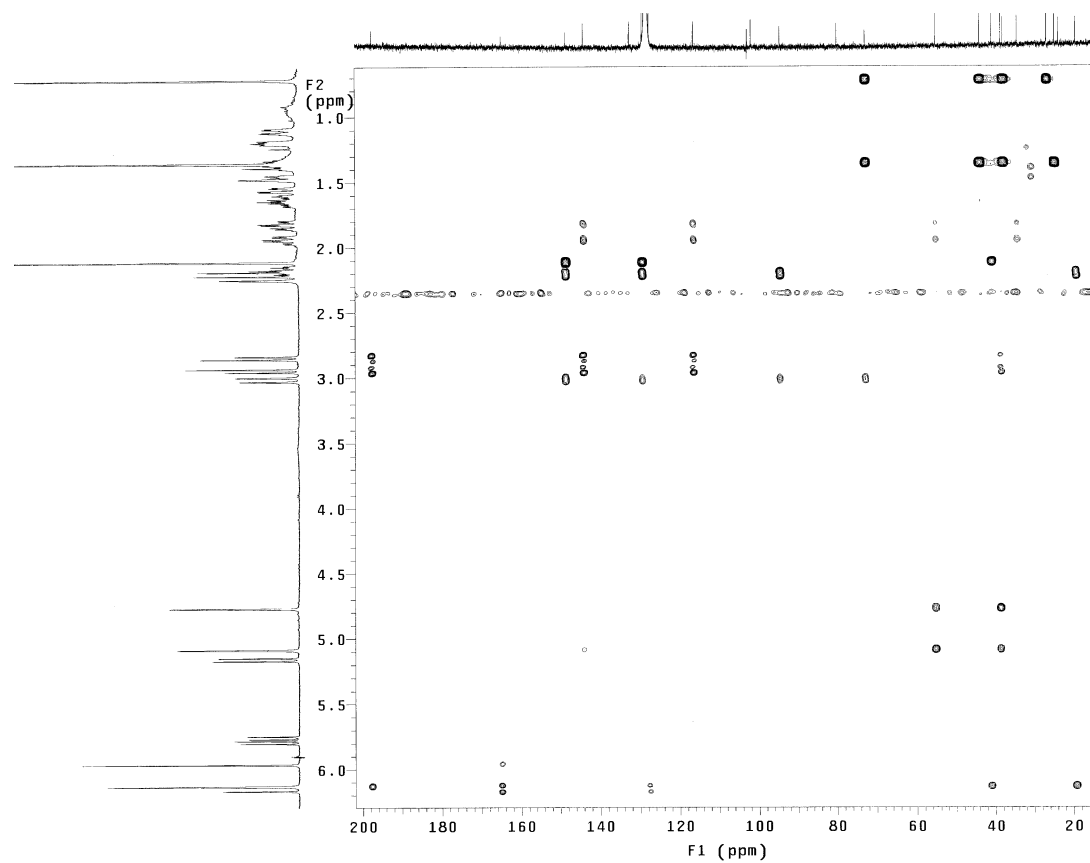

**Figure S6.** HMBC spectrum of **1** in C<sub>6</sub>D<sub>6</sub>



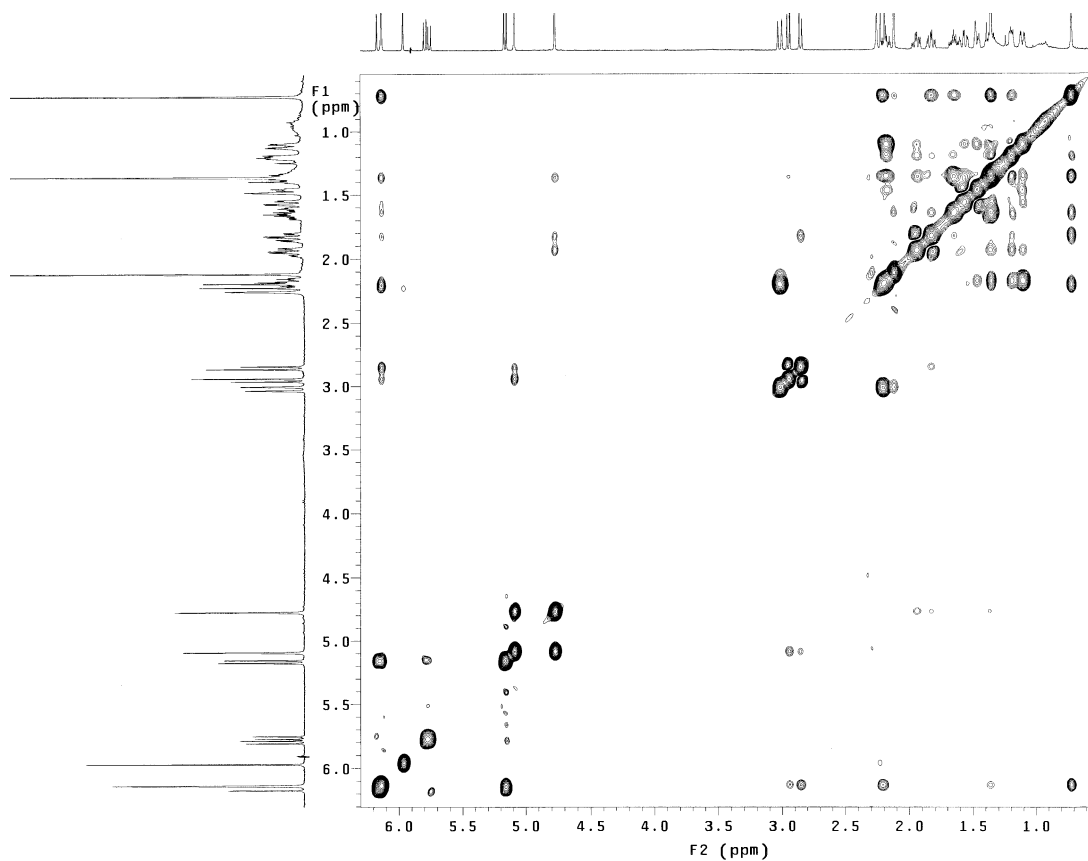

Figure S7. NOESY spectrum of **1** in C<sub>6</sub>D<sub>6</sub>

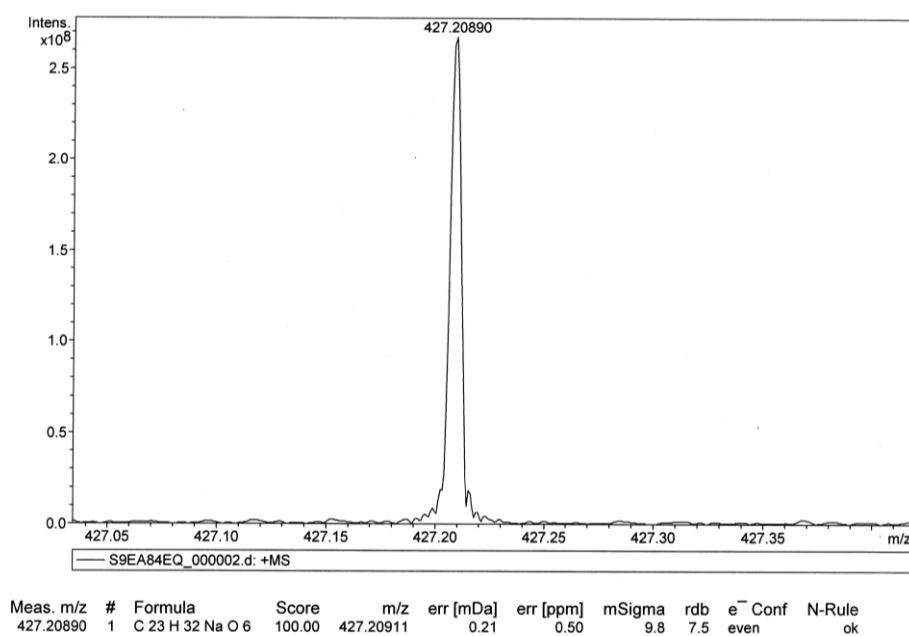

Figure S8. HRESIMS spectrum of **2**



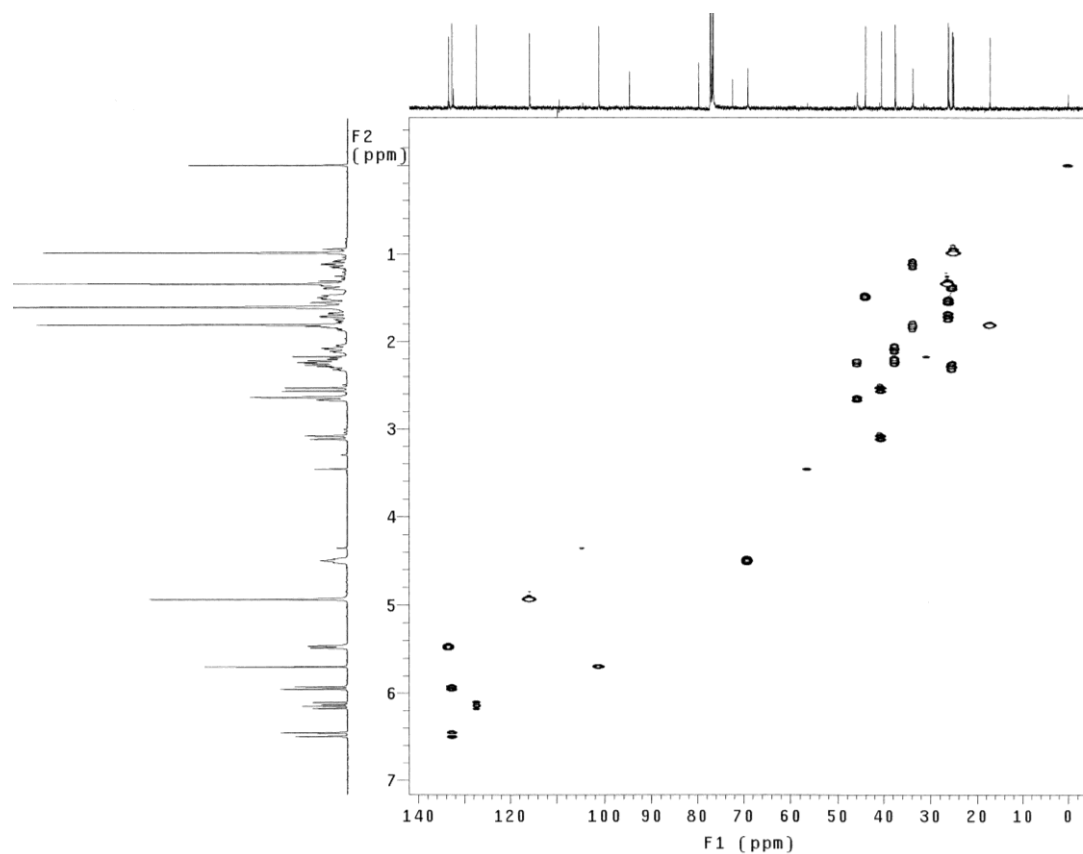

**Figure S11.** HSQC spectrum of **2** in CDCl<sub>3</sub>

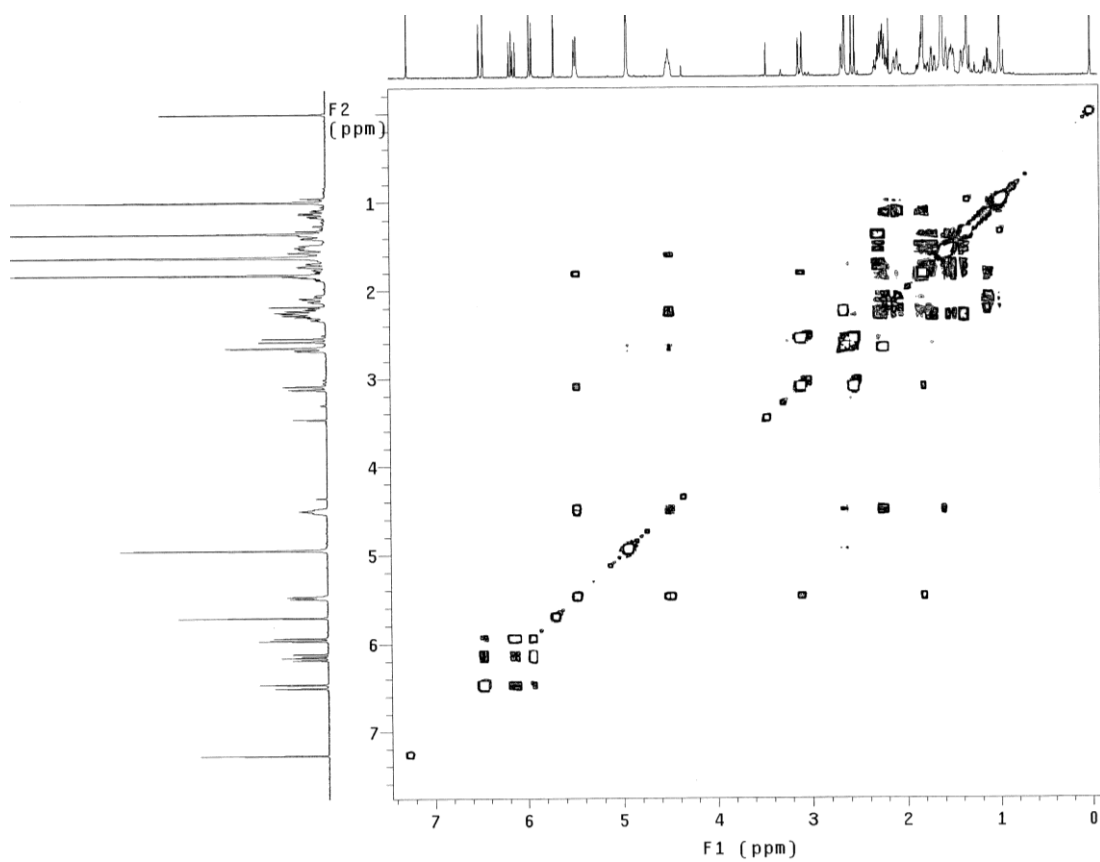

**Figure S12.** COSY spectrum of **2** in CDCl<sub>3</sub>

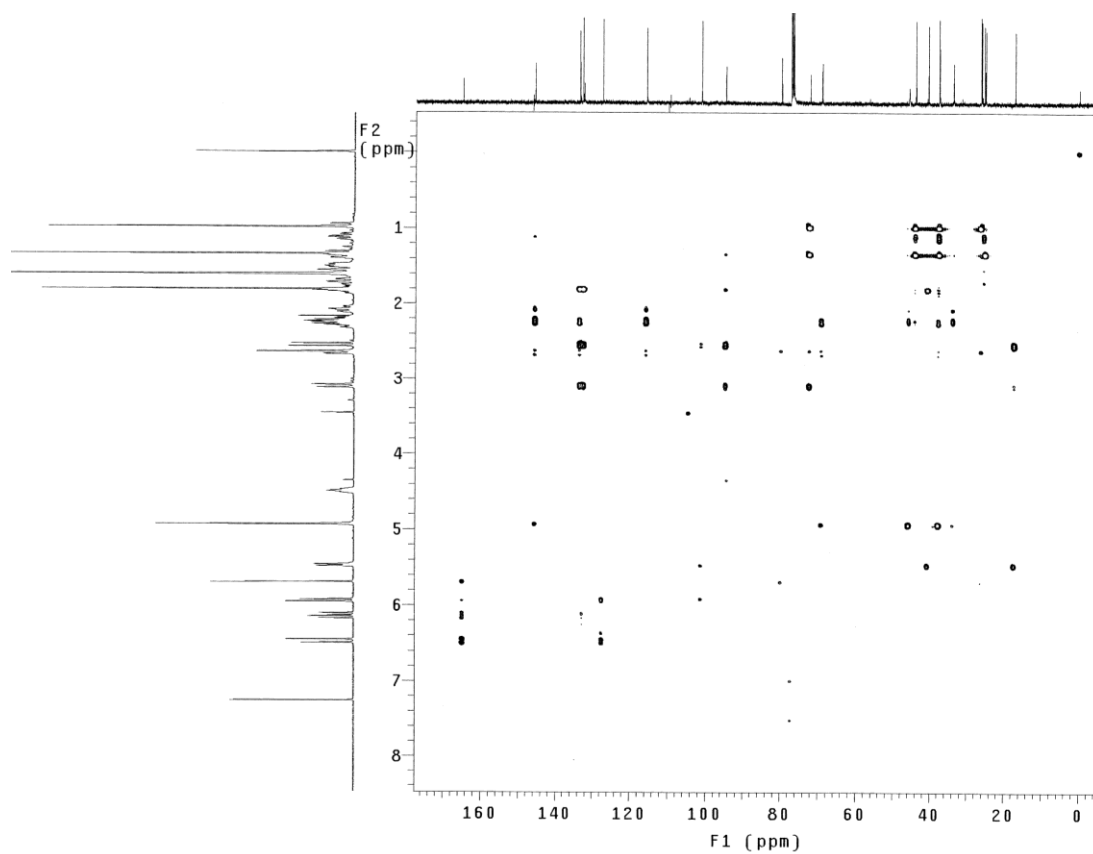

Figure S13. HMBC spectrum of **2** in CDCl<sub>3</sub>

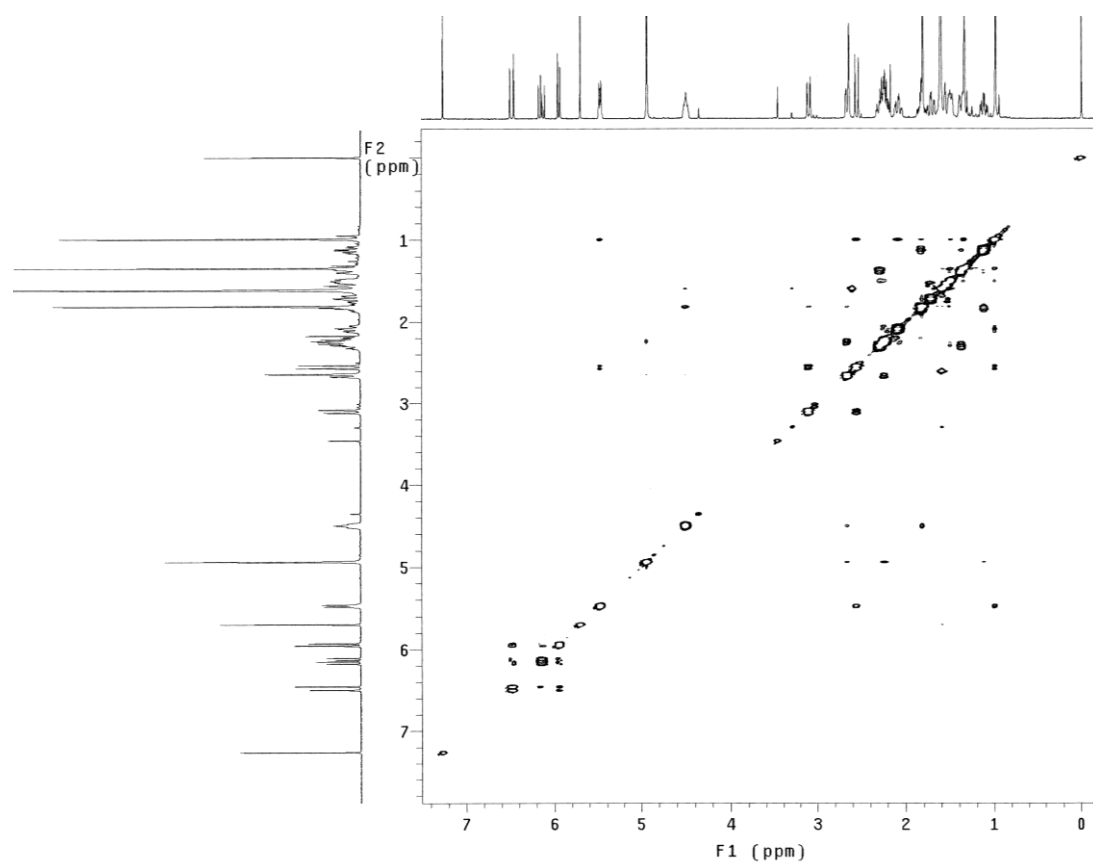

Figure S14. NOESY spectrum of **2** in CDCl<sub>3</sub>

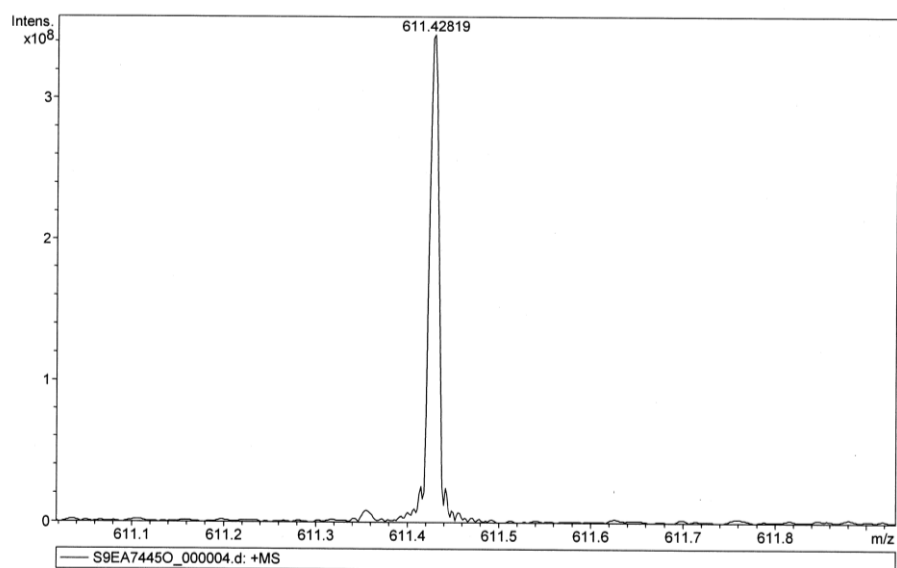

| Meas. m/z | # | Formula                                          | Score  | m/z       | err [mDa] | err [ppm] | mSigma | rdb | e <sup>-</sup> Conf | N-Rule |
|-----------|---|--------------------------------------------------|--------|-----------|-----------|-----------|--------|-----|---------------------|--------|
| 611.42819 | 1 | C <sub>36</sub> H <sub>60</sub> NaO <sub>6</sub> | 100.00 | 611.42821 | 0.02      | 0.04      | 7.8    | 6.5 | even                | ok     |

Figure S15. HRESIMS spectrum of 3

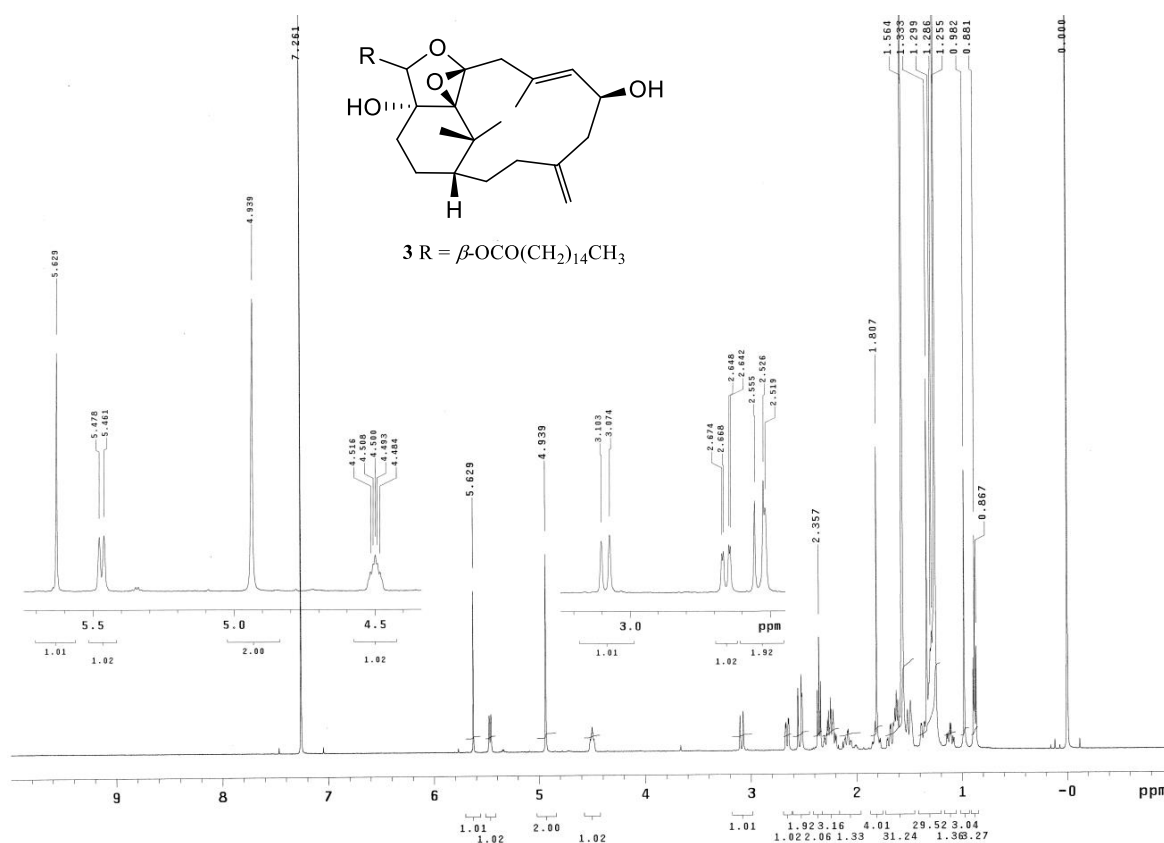

Figure S16. <sup>1</sup>H NMR spectrum of 3 in CDCl<sub>3</sub> at 500 MHz

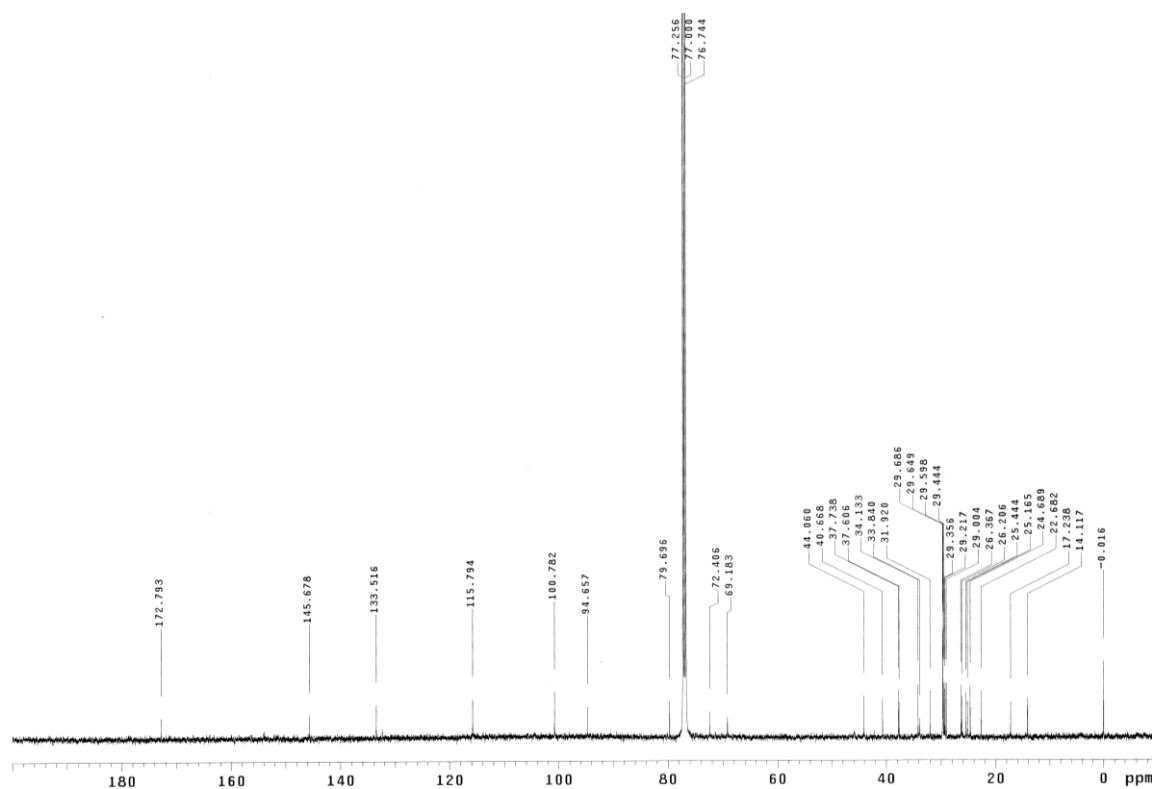

Figure S17.  $^{13}\text{C}$  NMR spectrum of **3** in  $\text{CDCl}_3$  at 125 MHz

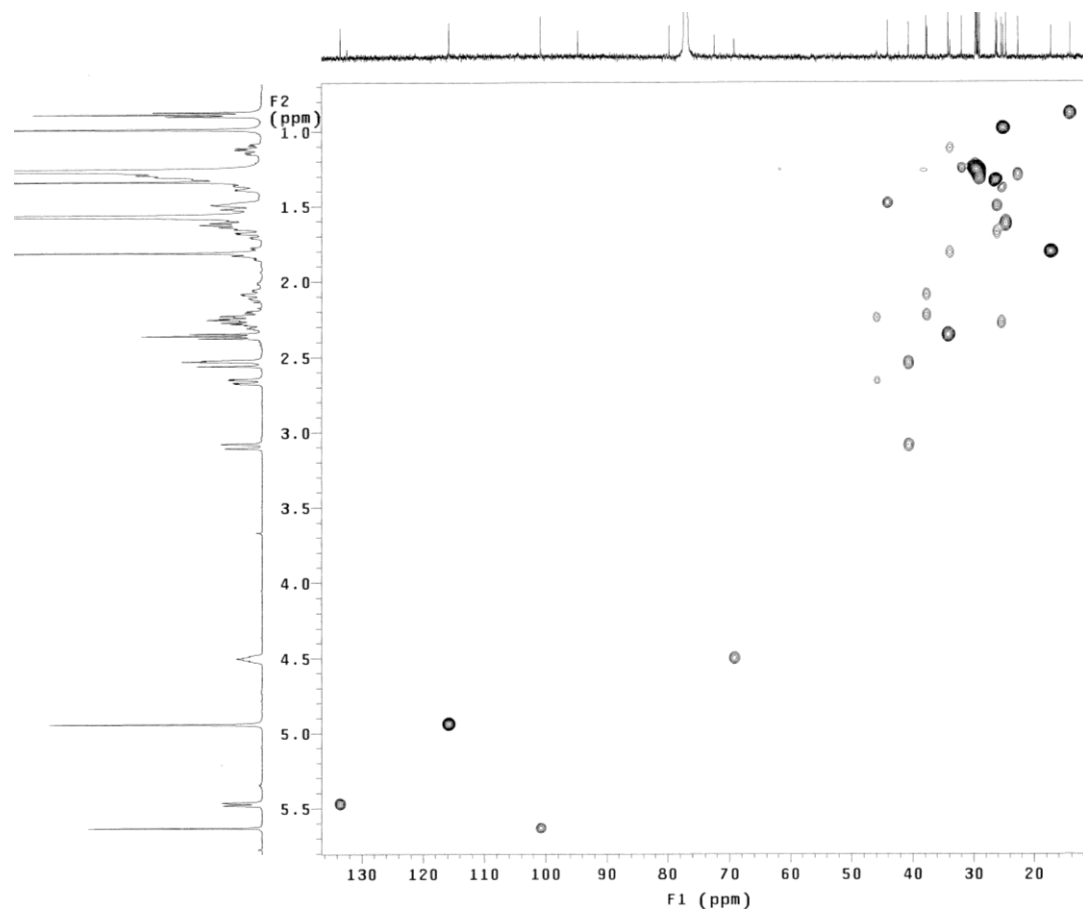

Figure S18. HSQC spectrum of **3** in  $\text{CDCl}_3$

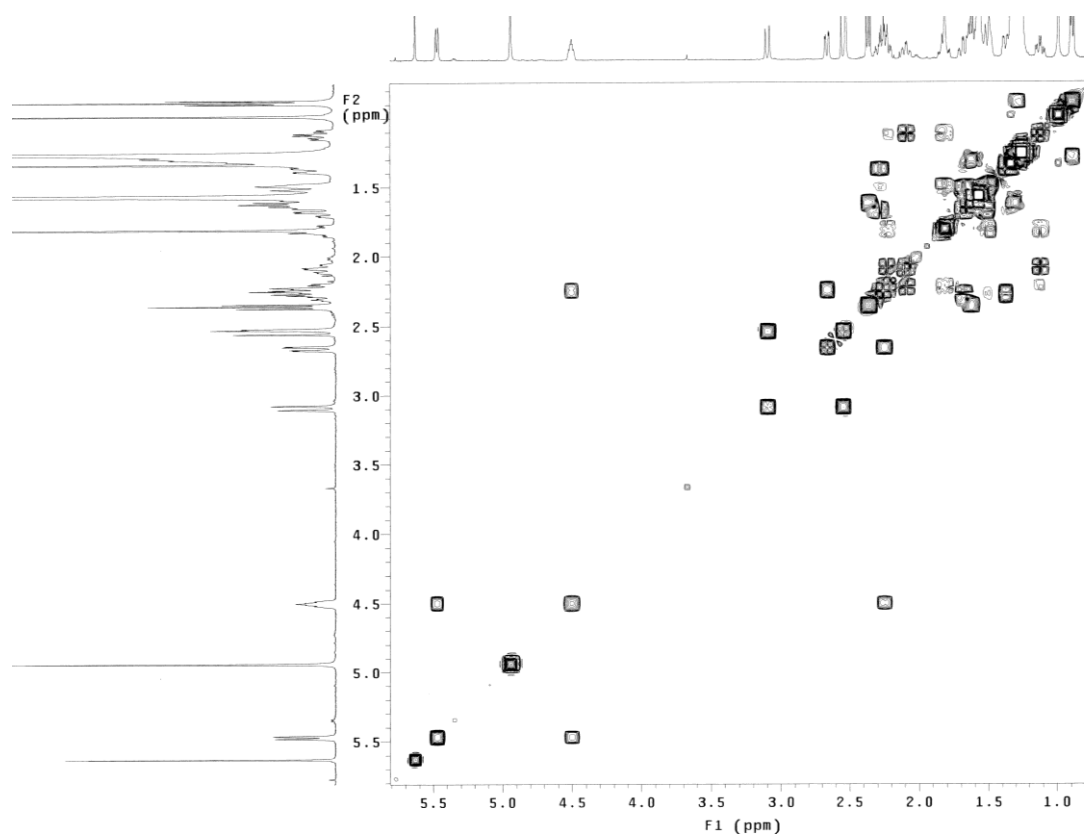

Figure S19. COSY spectrum of **3** in CDCl<sub>3</sub>

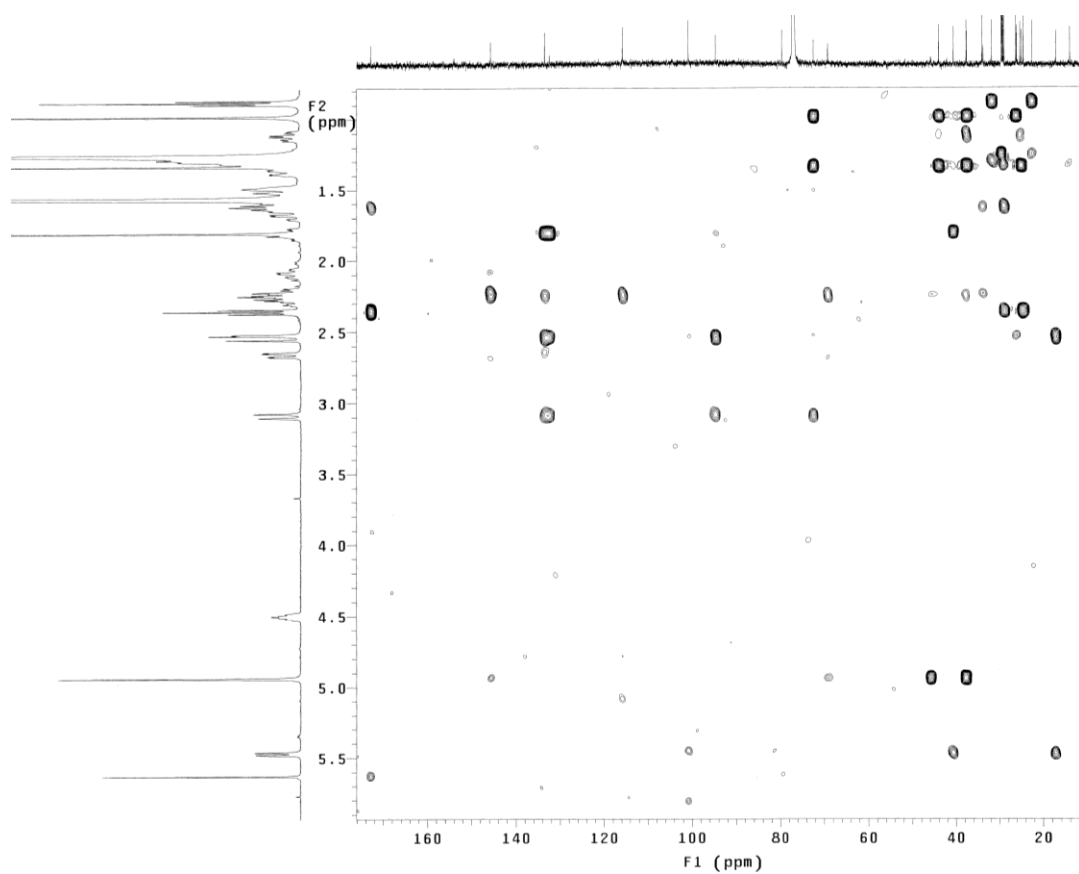

Figure S20. HMBC spectrum of **3** in CDCl<sub>3</sub>

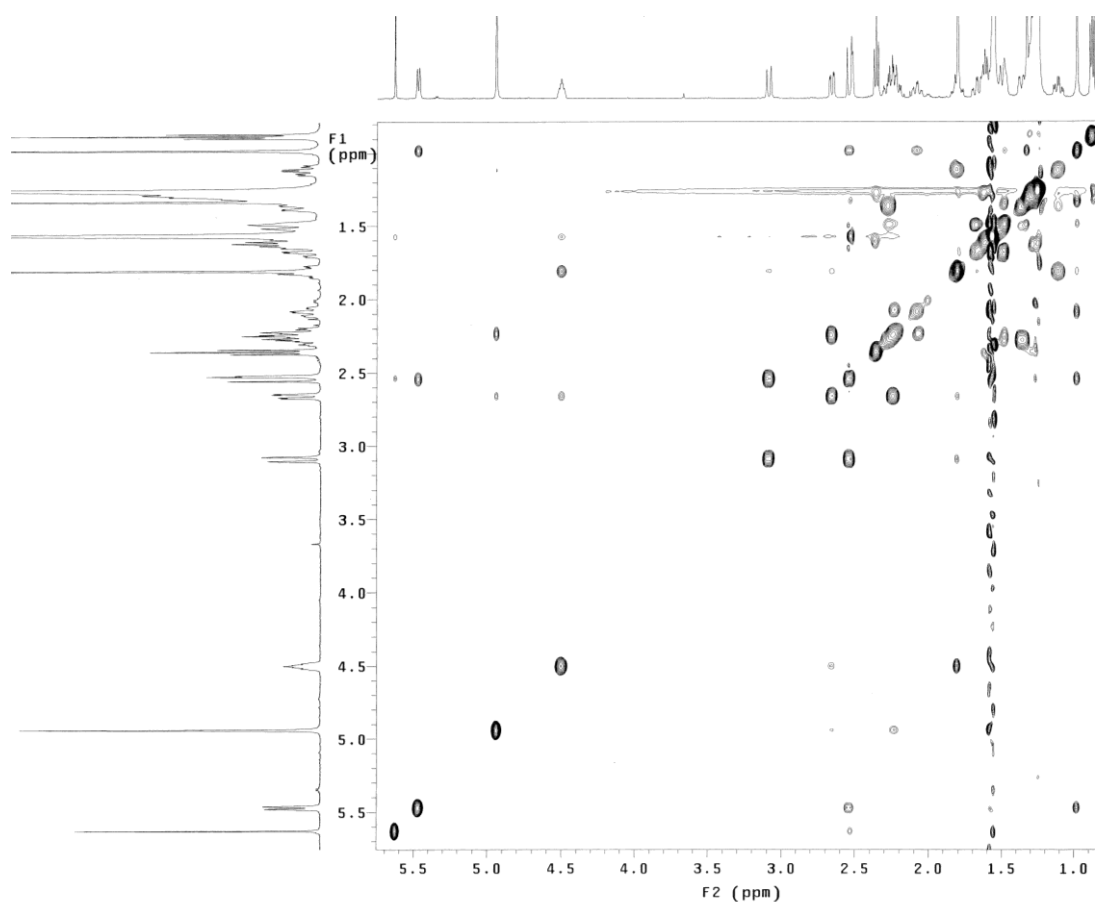

Figure S21. NOESY spectrum of **3** in CDCl<sub>3</sub>

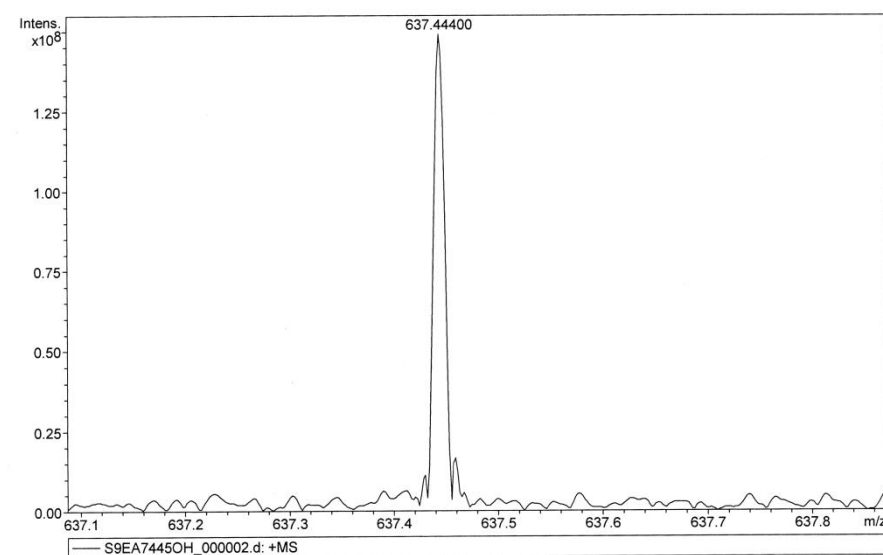

| Meas. m/z | # | Formula          | Score  | m/z       | err [mDa] | err [ppm] | mSigma | rdb | e <sup>-</sup> | Conf | N-Rule |
|-----------|---|------------------|--------|-----------|-----------|-----------|--------|-----|----------------|------|--------|
| 637.44400 | 1 | C 38 H 62 Na O 6 | 100.00 | 637.44386 | -0.14     | -0.21     | 24.2   | 7.5 | even           |      | ok     |

Figure S22. HRESIMS spectrum of **4**



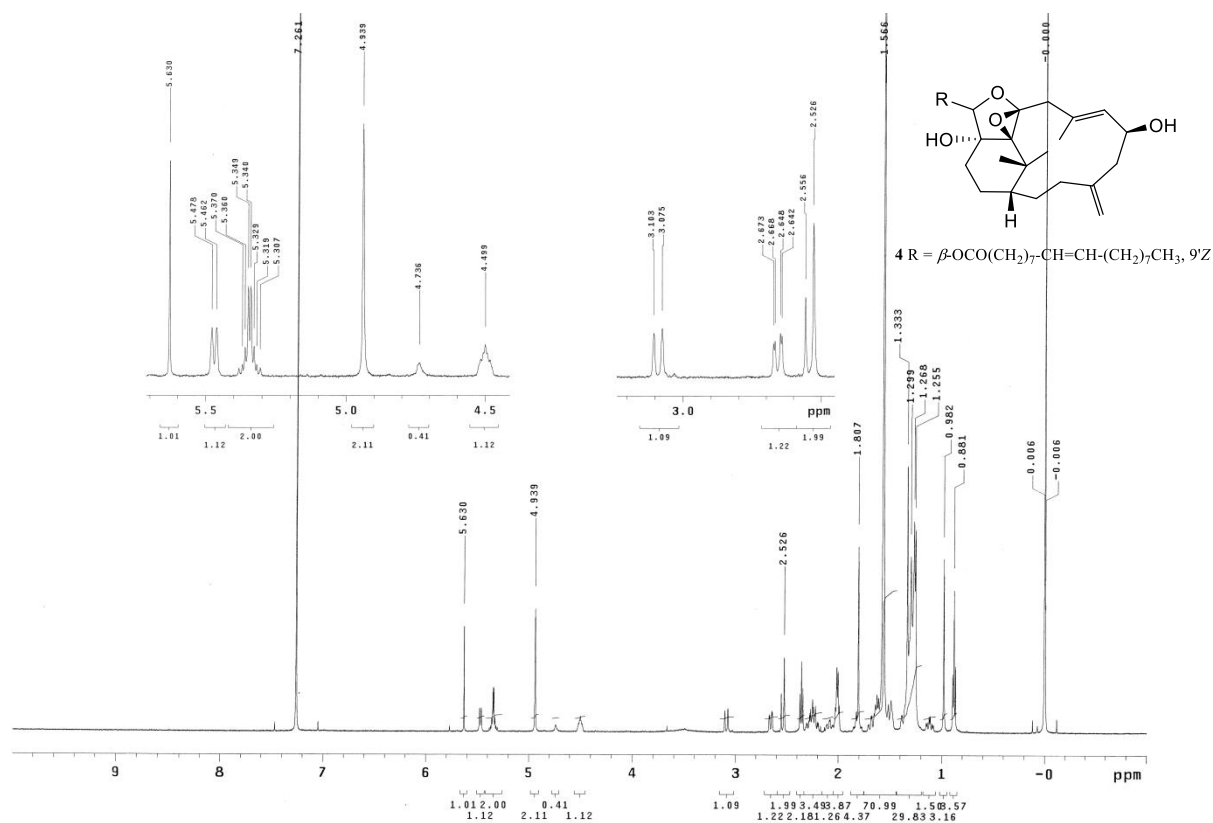

**Figure S23.**  $^1\text{H}$  NMR spectrum of **4** in  $\text{CDCl}_3$  at 500 MHz

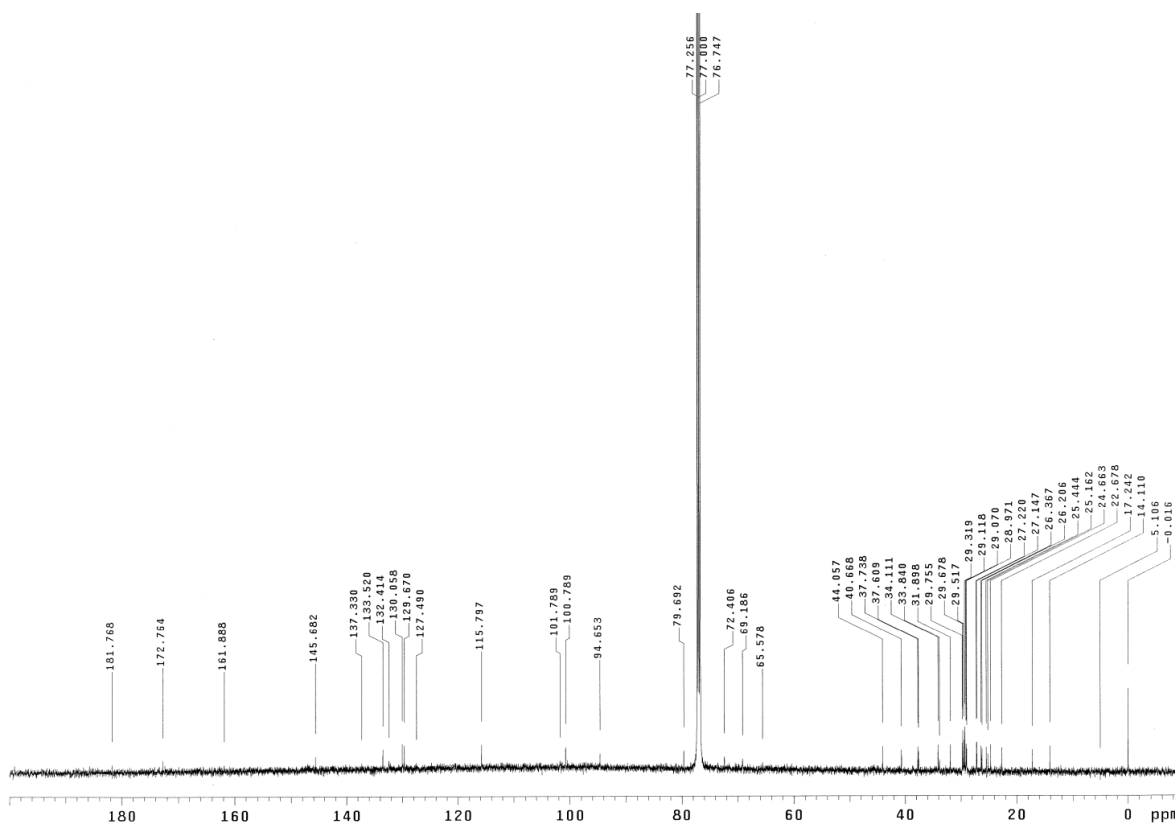

**Figure S24.**  $^{13}\text{C}$  NMR spectrum of **4** in  $\text{CDCl}_3$  at 125 MHz

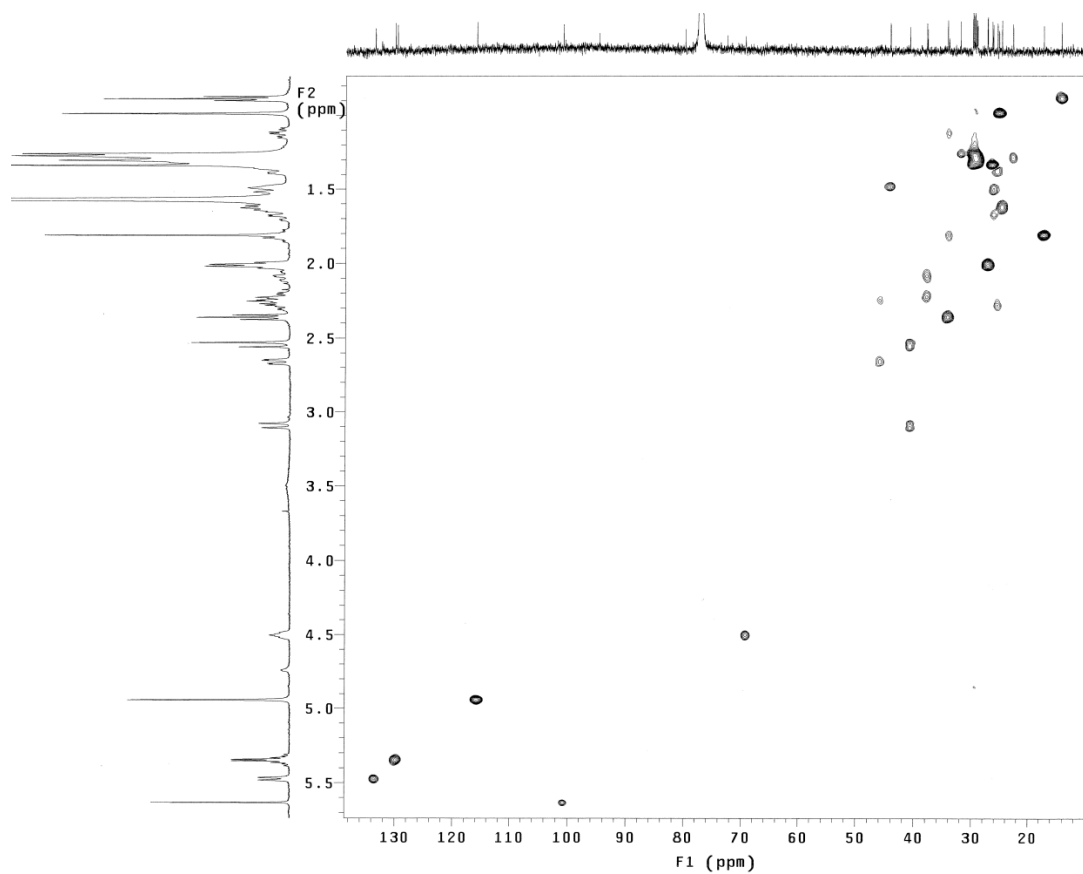

Figure S25. HSQC spectrum of **4** in CDCl<sub>3</sub>

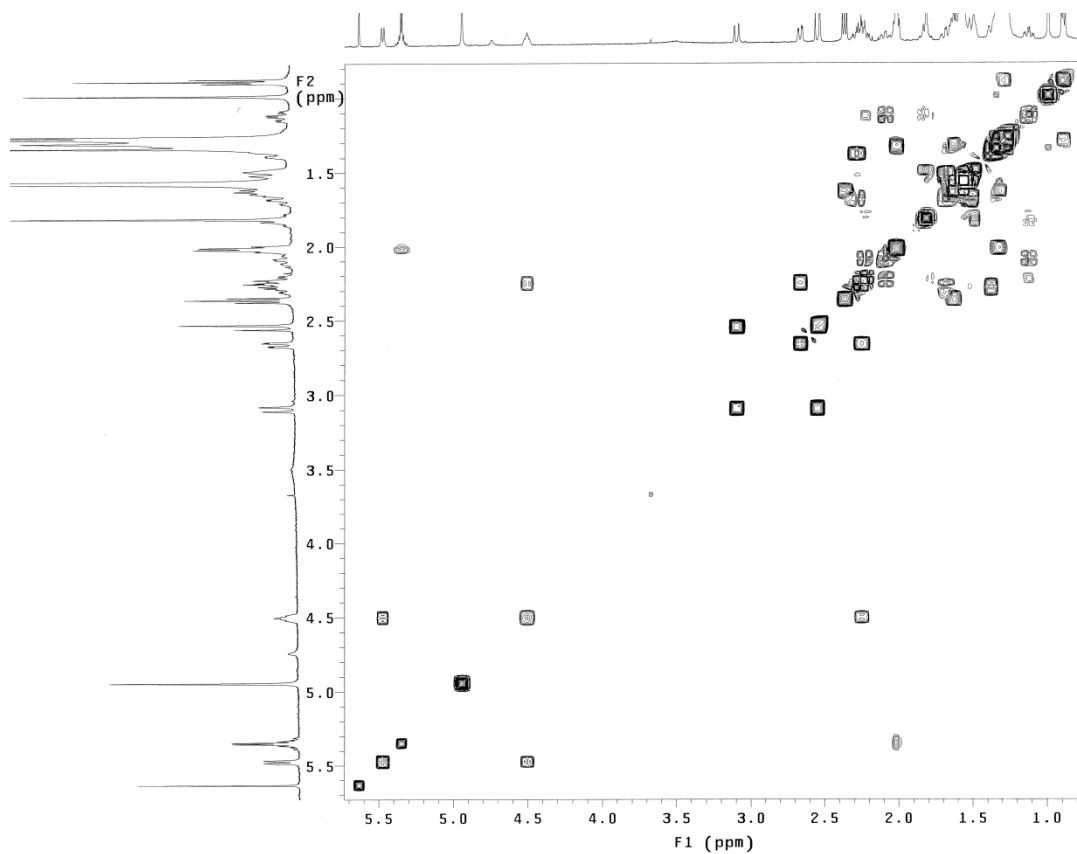

Figure S26. COSY spectrum of **4** in CDCl<sub>3</sub>

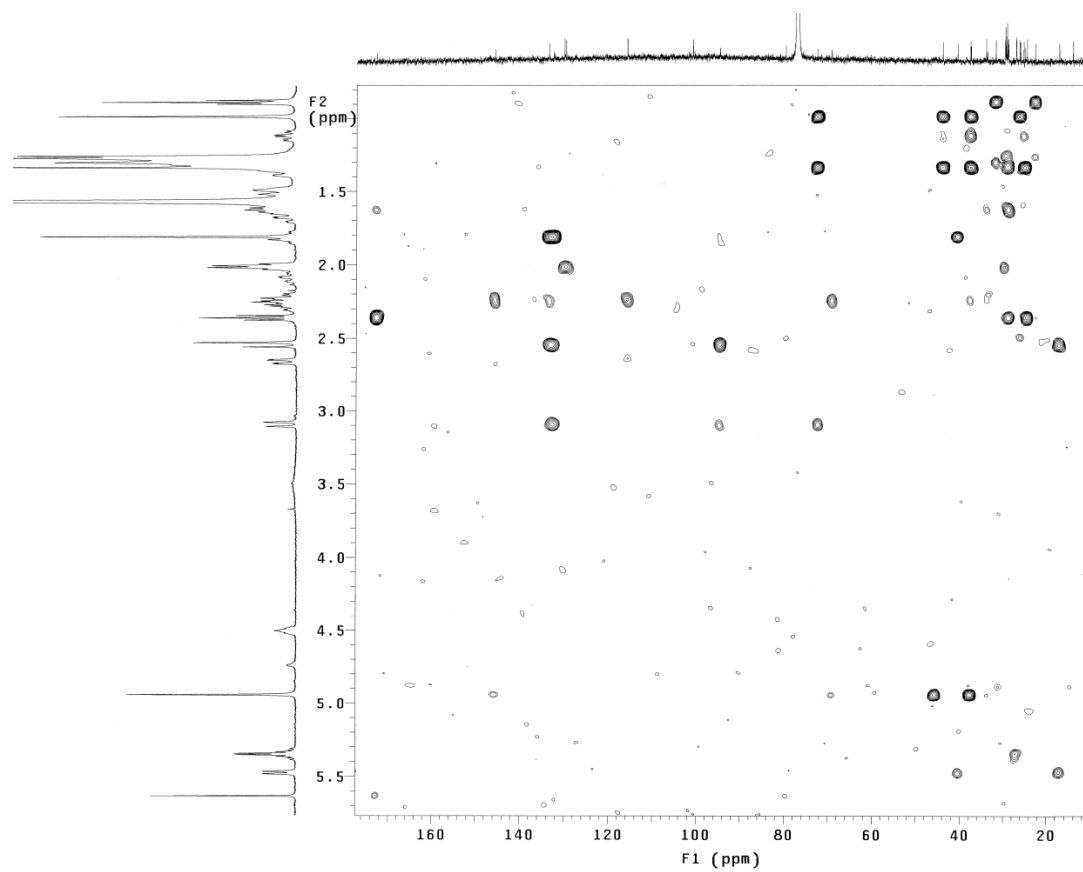

Figure S27. HMBC spectrum of **4** in CDCl<sub>3</sub>

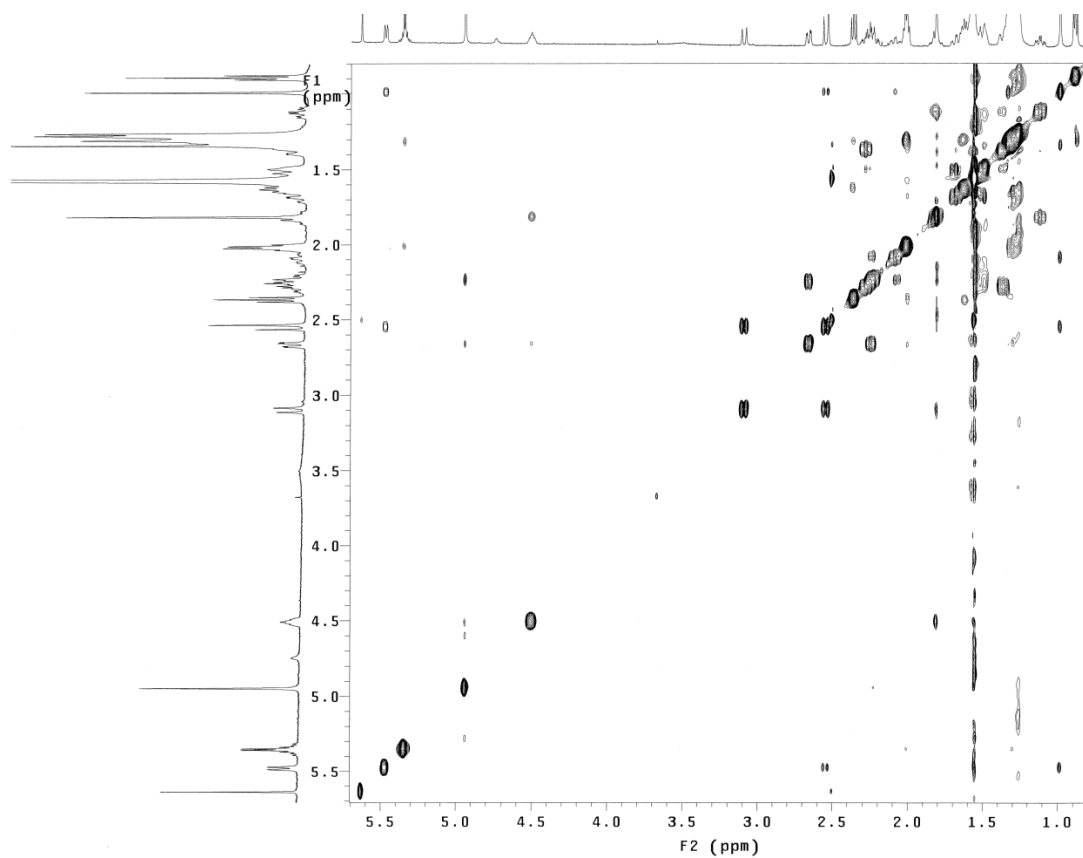

Figure S28. NOESY spectrum of **4** in CDCl<sub>3</sub>

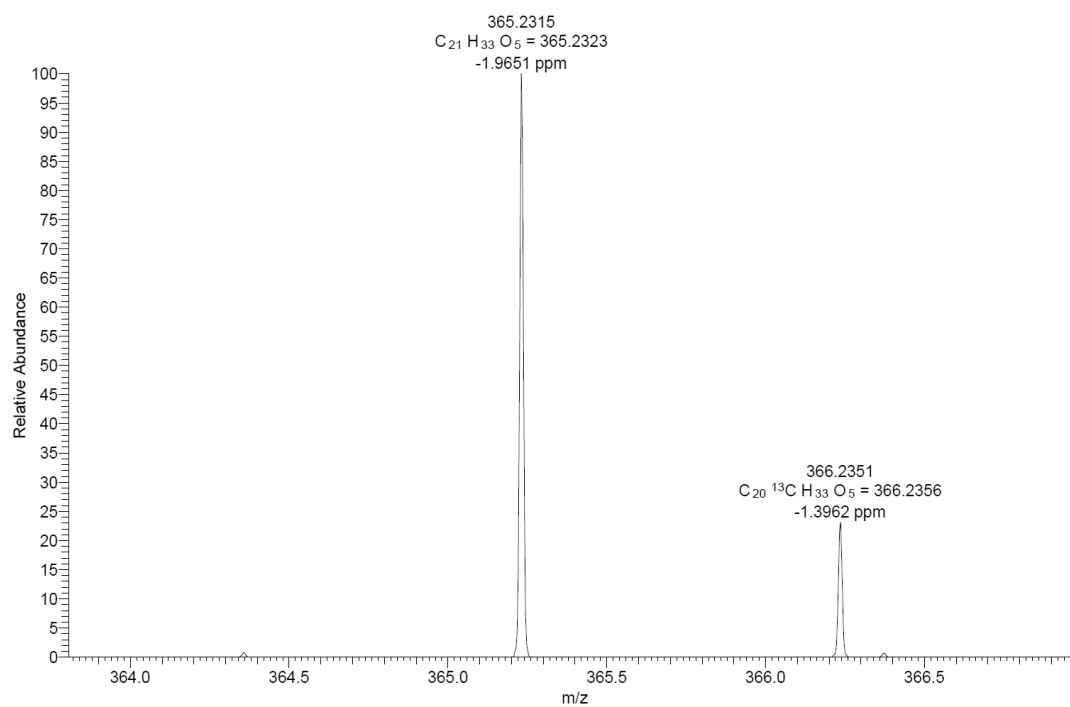

Figure S29. HRESIMS spectrum of 5

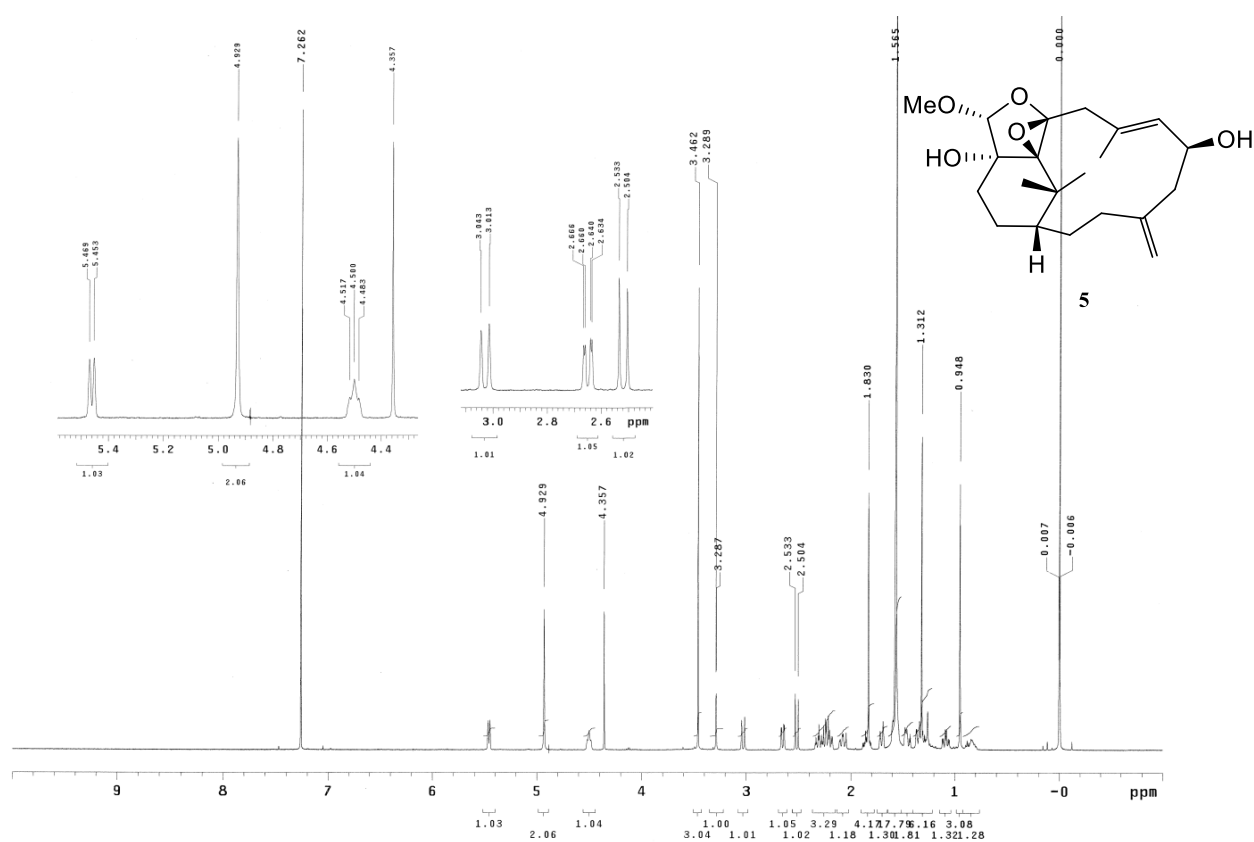

Figure S30.  $^1H$  NMR spectrum of 5 in  $CDCl_3$  at 500 MHz

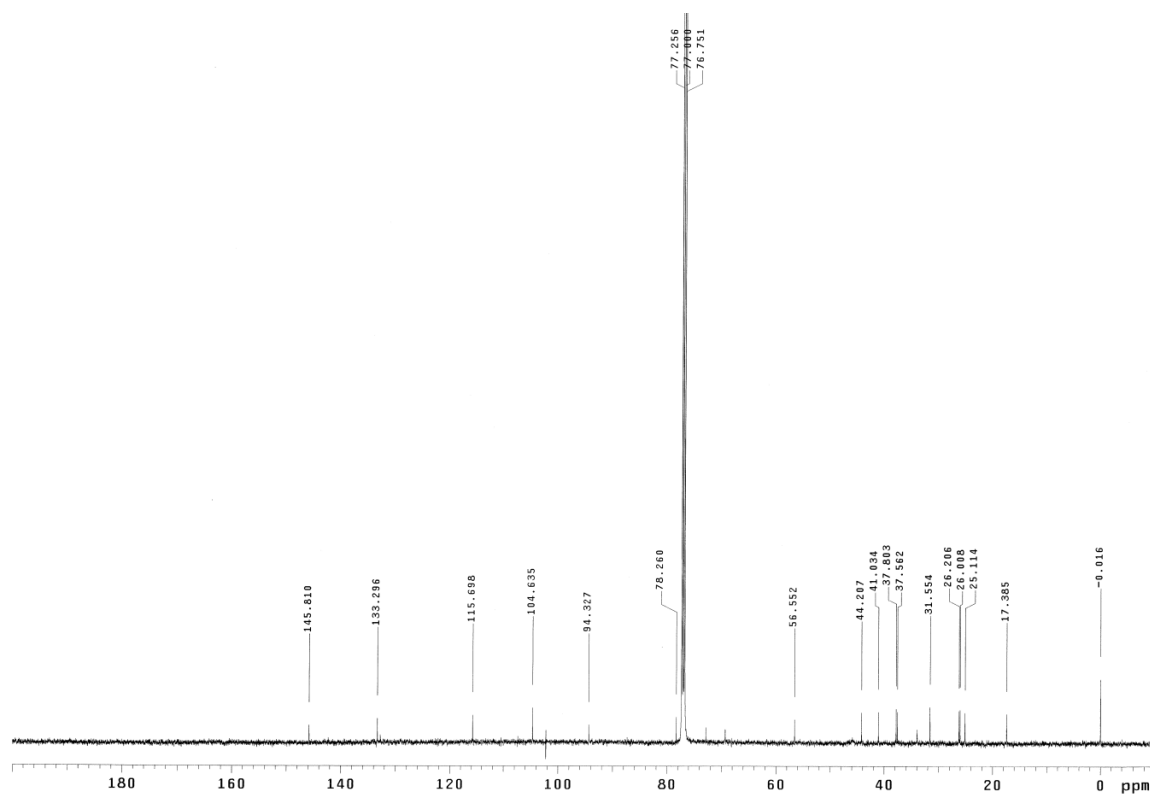

Figure S31. <sup>13</sup>C NMR spectrum of 5 in CDCl<sub>3</sub> at 125 MHz

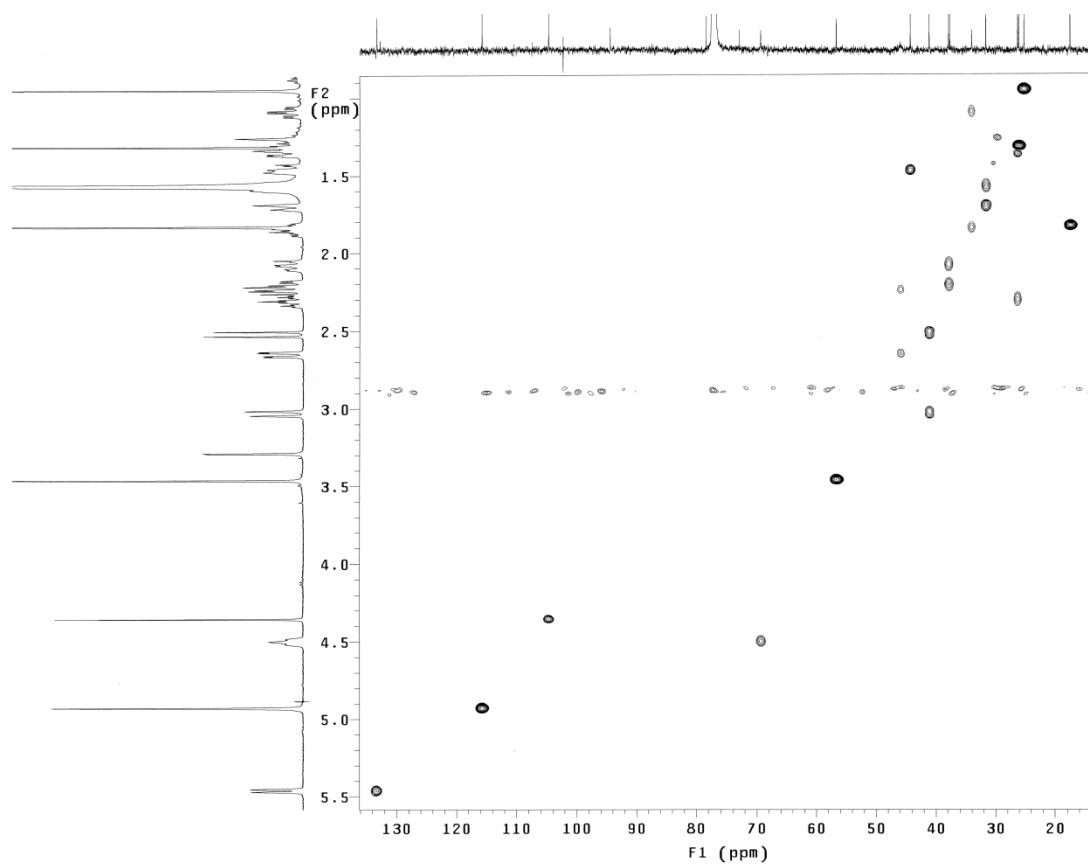

Figure S32. HSQC spectrum of 5 in CDCl<sub>3</sub>

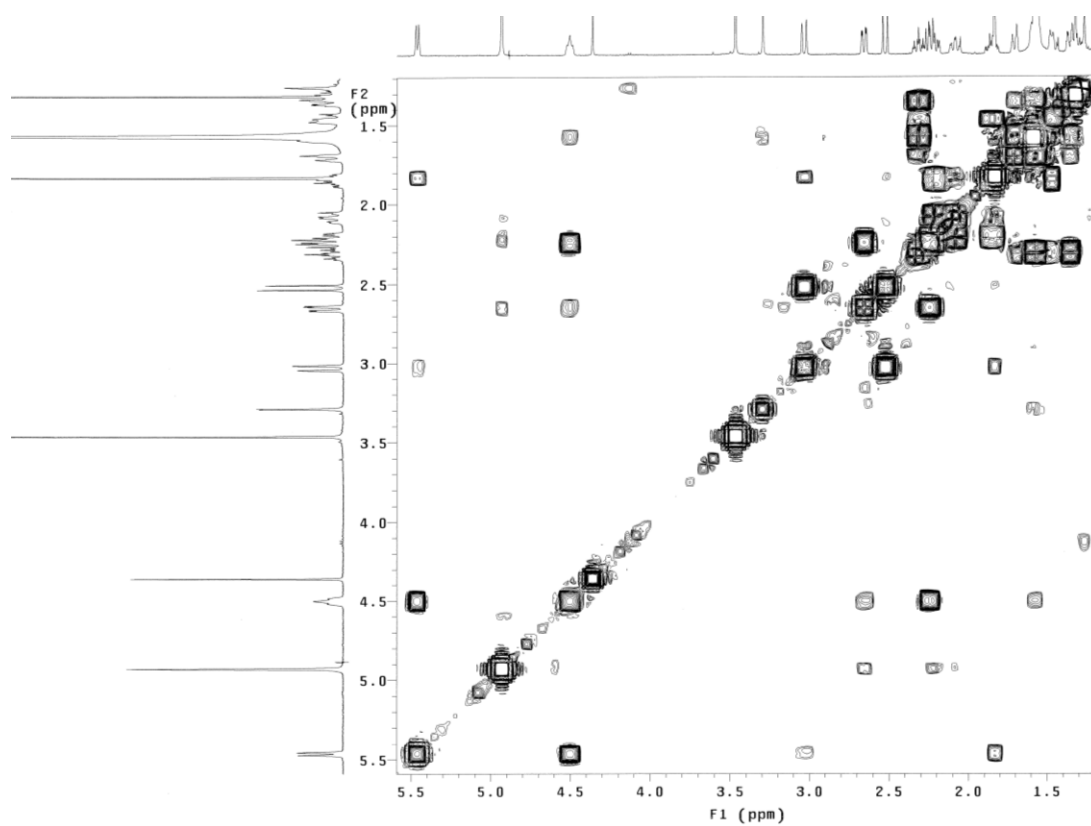

Figure S33. COSY spectrum of **5** in CDCl<sub>3</sub>

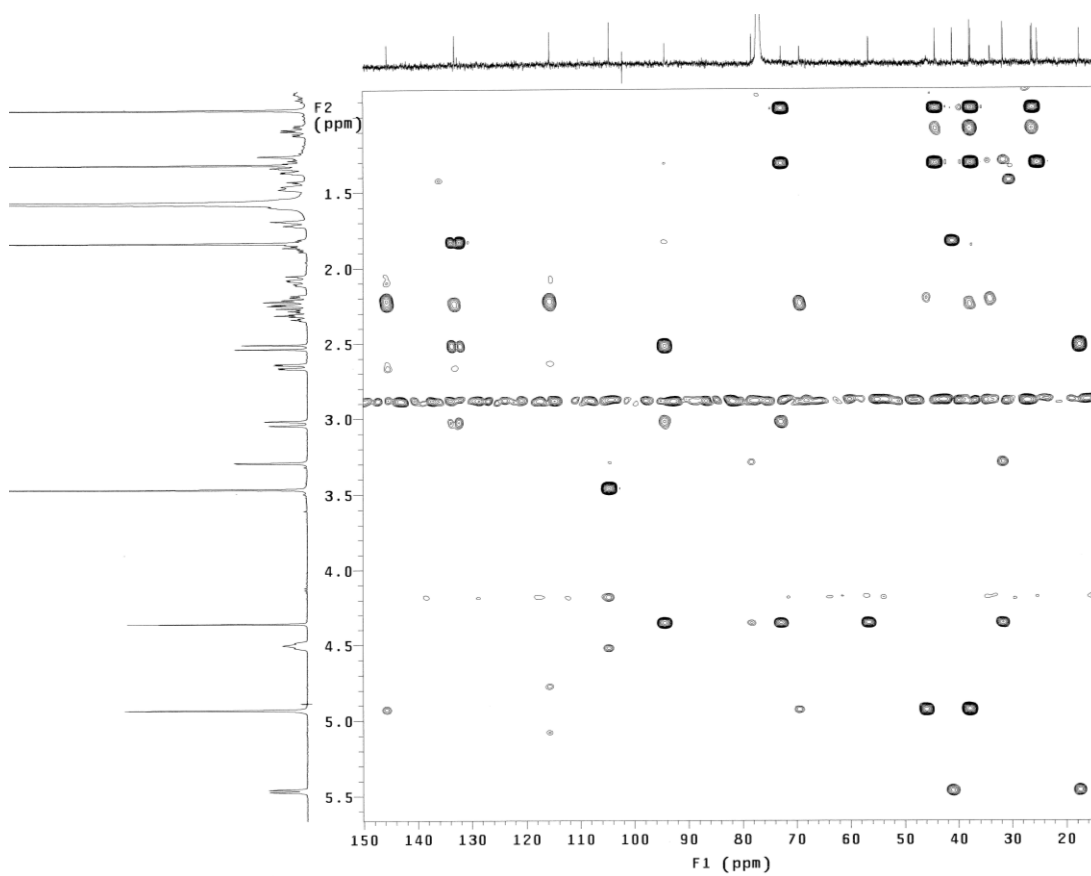

Figure S34. HMBC spectrum of **5** in CDCl<sub>3</sub>

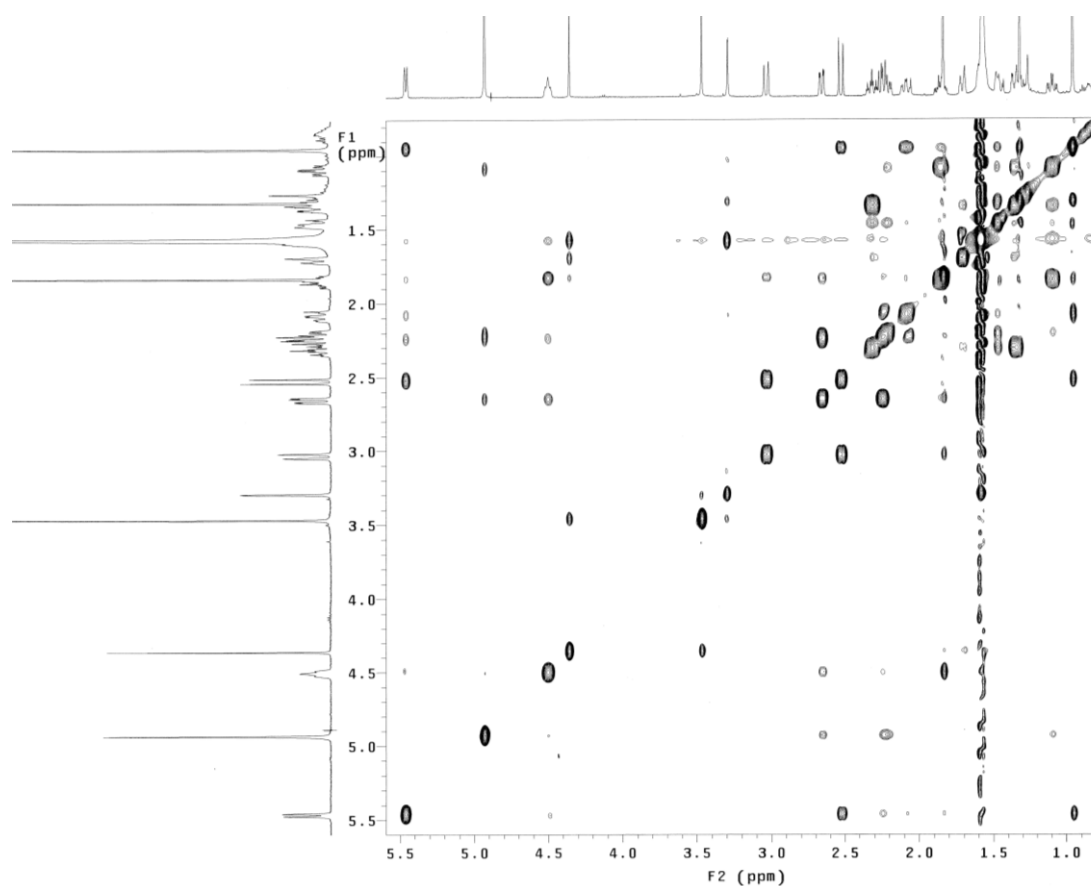

Figure S35. NOESY spectrum of of 5 in  $\text{CDCl}_3$

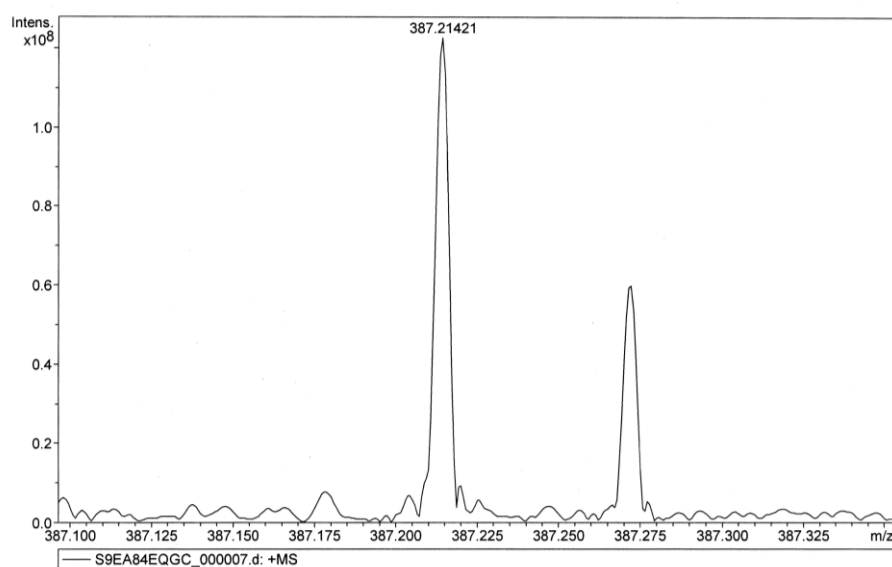

| Meas. m/z | # | Formula                                          | Score  | m/z       | err [mDa] | err [ppm] | mSigma | rdB | e <sup>-</sup> Conf | N-Rule |
|-----------|---|--------------------------------------------------|--------|-----------|-----------|-----------|--------|-----|---------------------|--------|
| 387.21421 | 1 | C <sub>21</sub> H <sub>32</sub> NaO <sub>5</sub> | 100.00 | 387.21420 | -0.02     | -0.04     | 32.2   | 5.5 | even                | ok     |

Figure S36. HRESIMS spectrum of 6

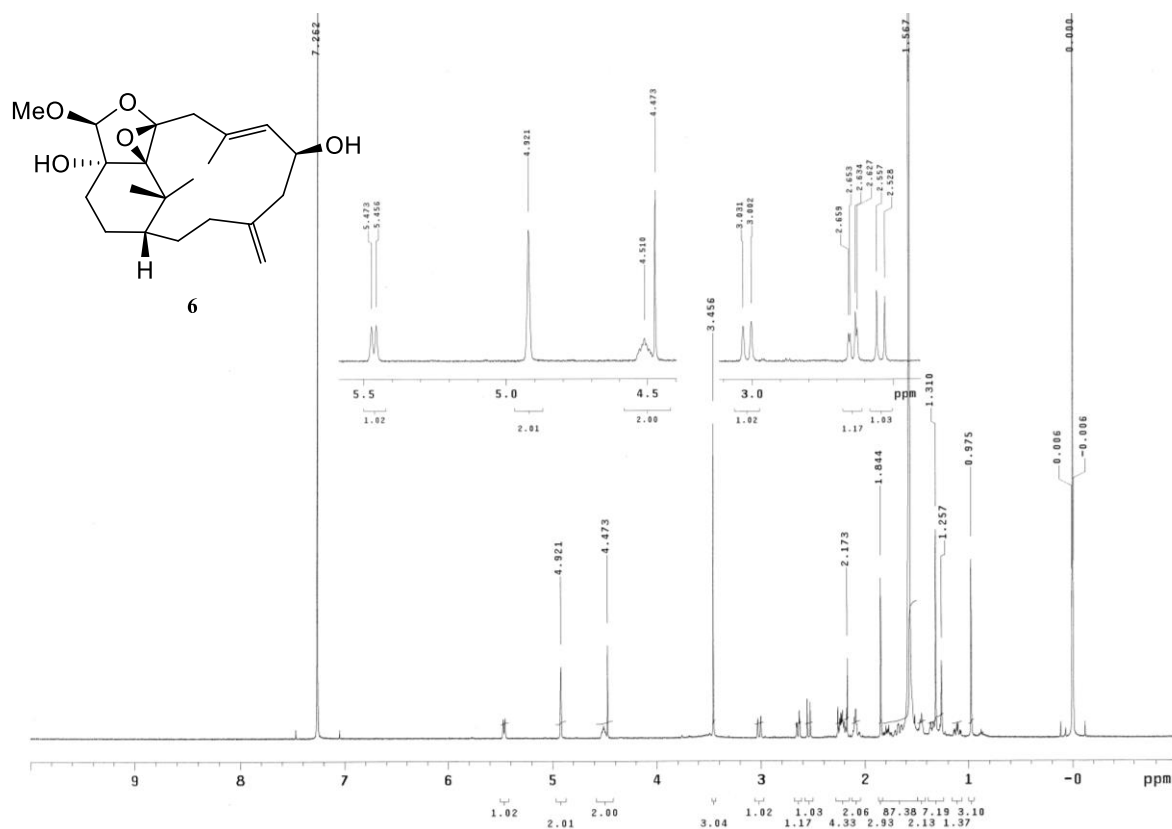

Figure S37. <sup>1</sup>H NMR spectrum of 6 CDCl<sub>3</sub> at 500 MHz

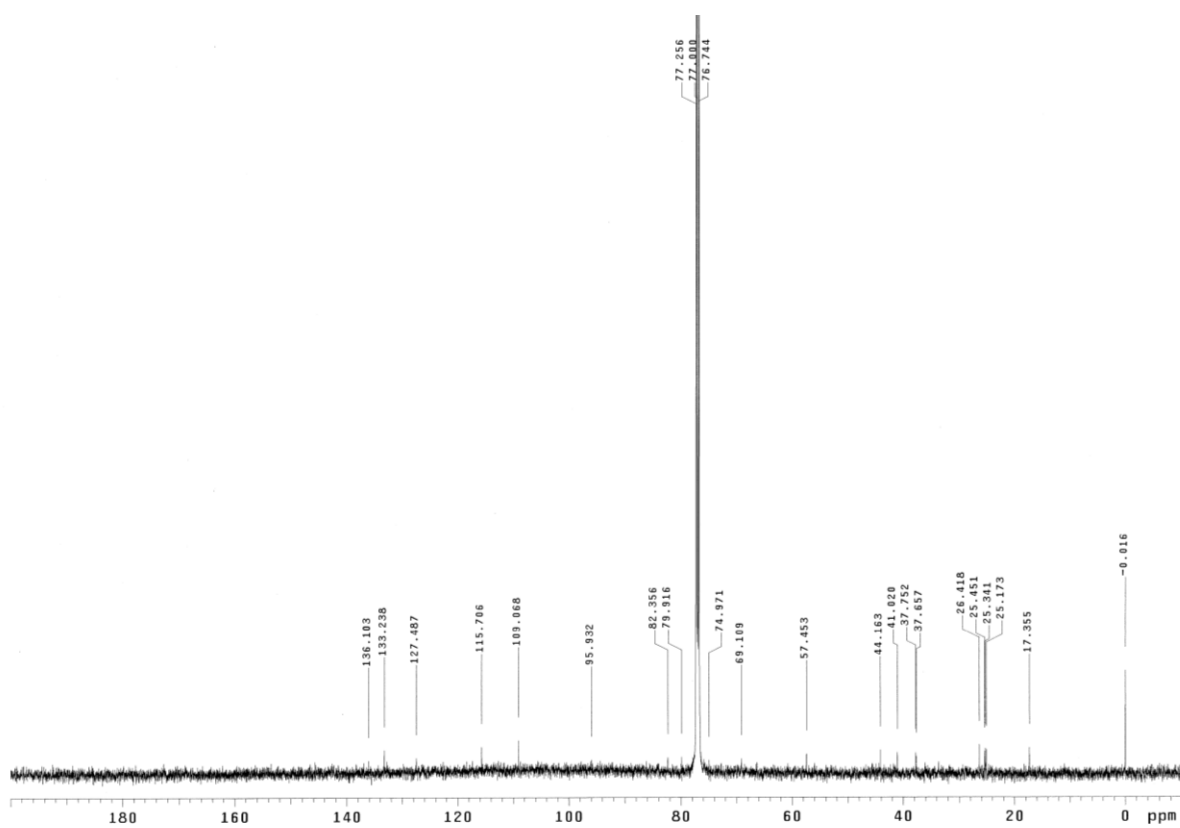

Figure S38. <sup>13</sup>C NMR spectrum of 6 in CDCl<sub>3</sub> at 125 MHz



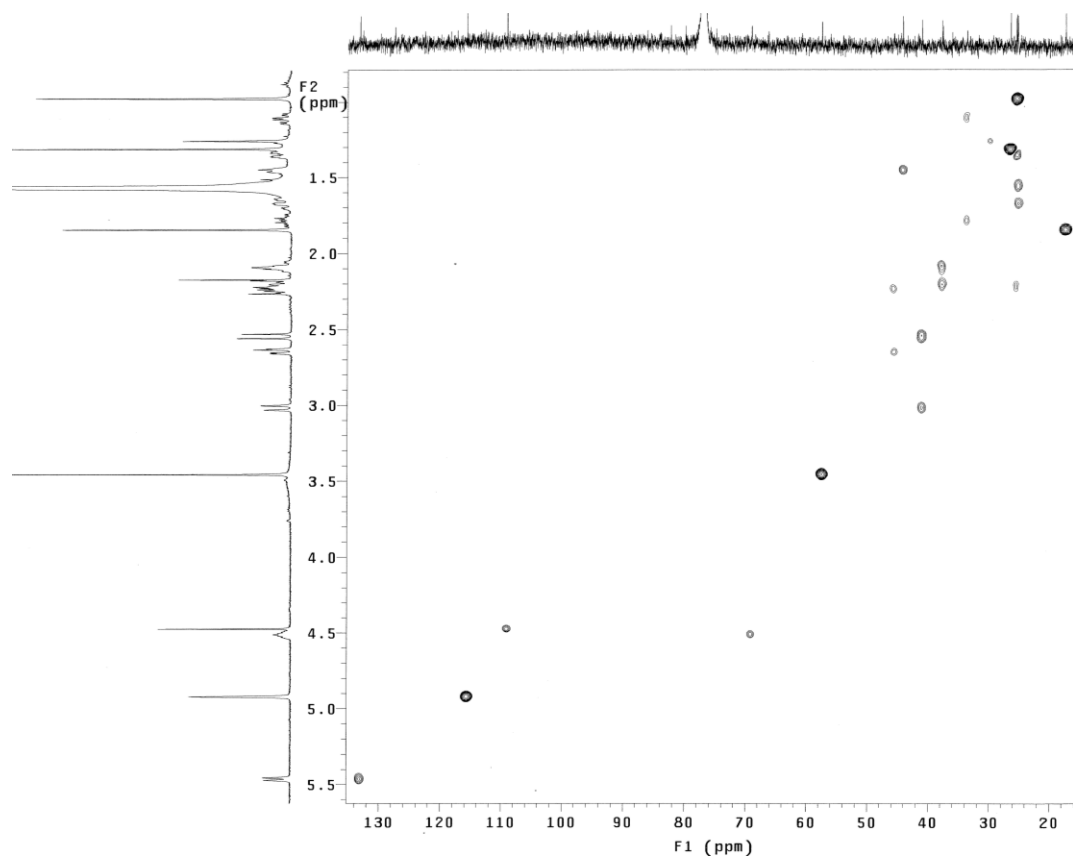

**Figure S39.** HSQC spectrum of **6** in  $\text{CDCl}_3$

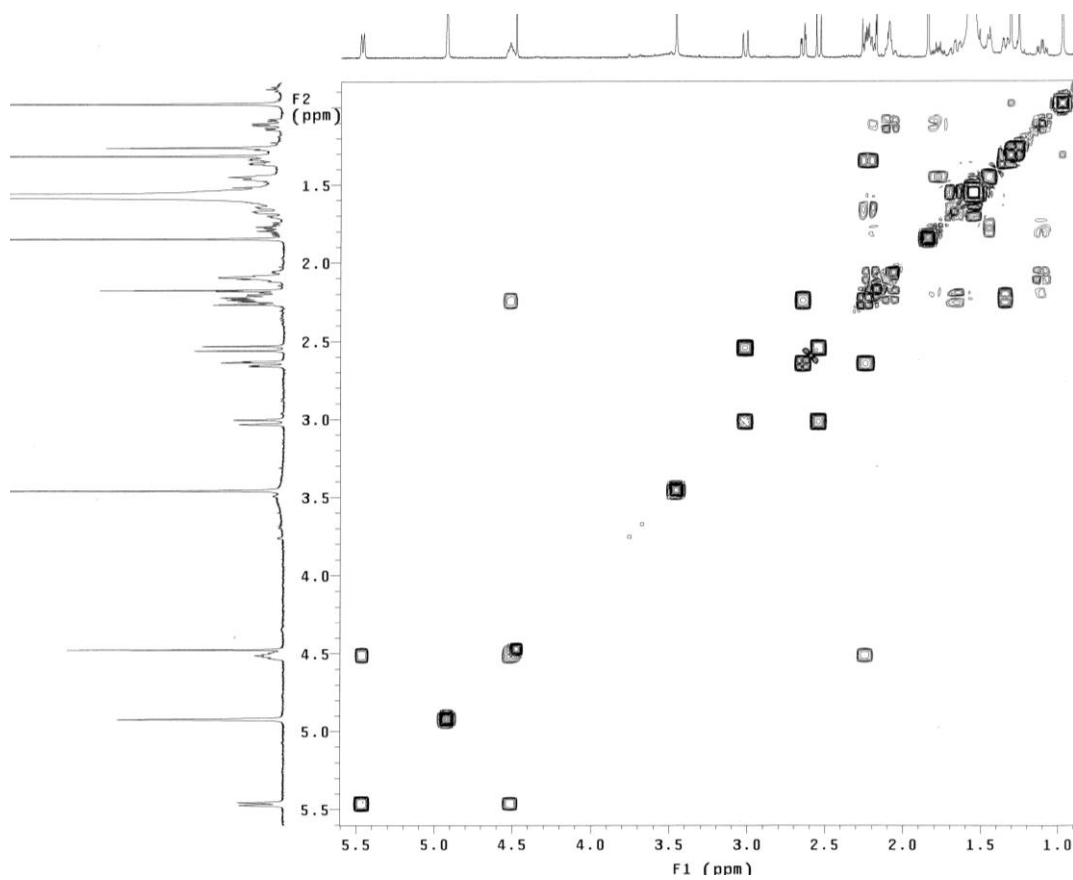

**Figure S40.** COSY spectrum of **6** in  $\text{CDCl}_3$

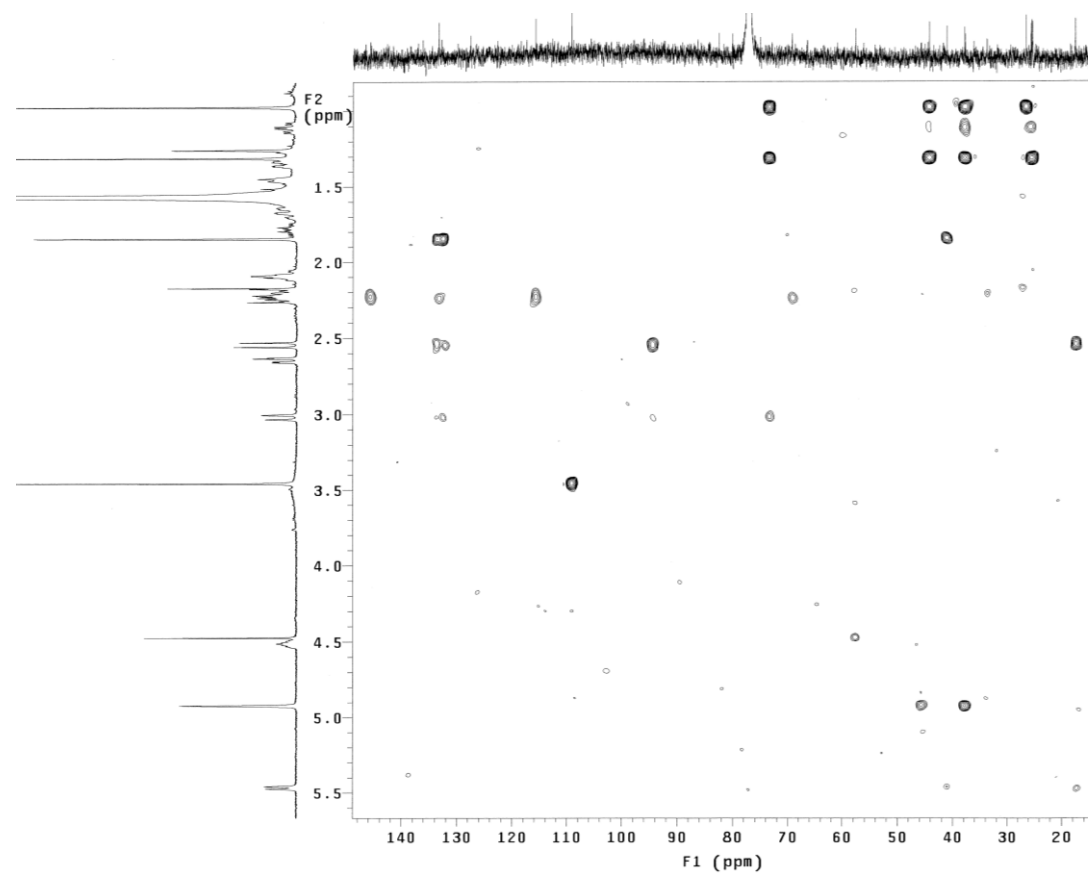

Figure S41. HMBC spectrum of **6** in  $\text{CDCl}_3$

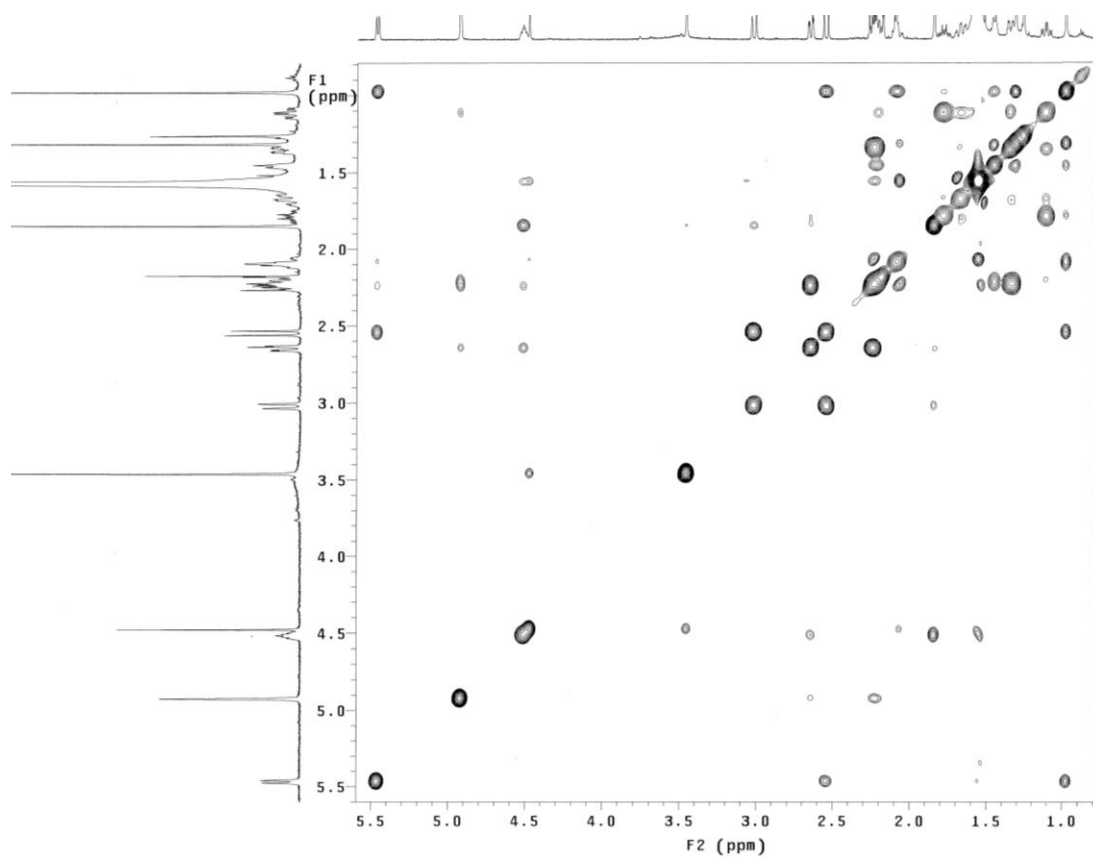

Figure S42. NOESY spectrum of **6** in  $\text{CDCl}_3$

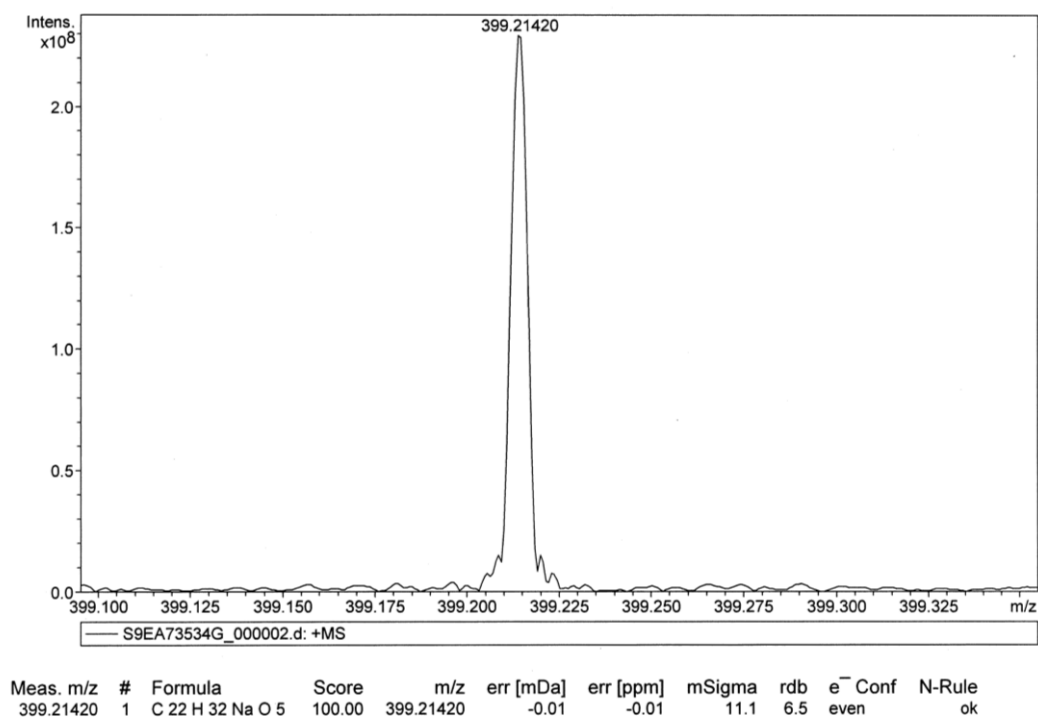

Figure S43. HRESIMS spectrum of 7

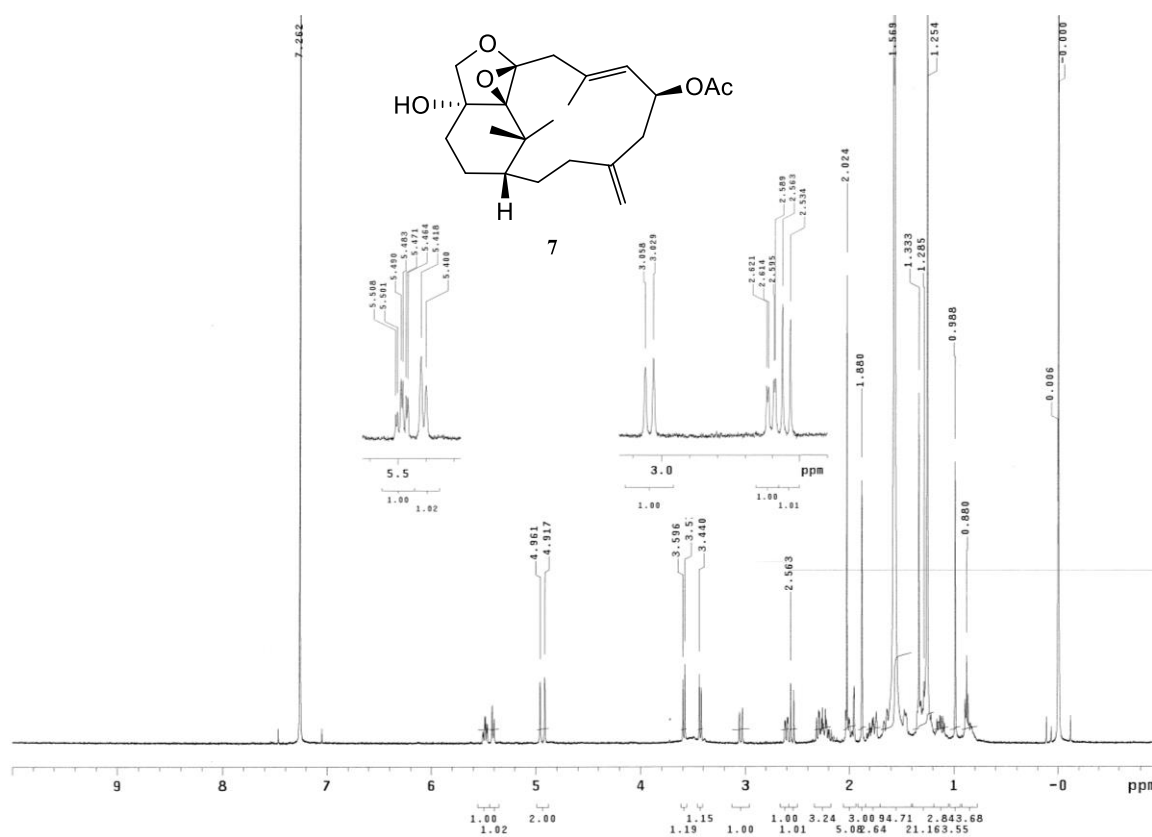

Figure S44. <sup>1</sup>H NMR spectrum of 7 in CDCl<sub>3</sub> at 500 MHz

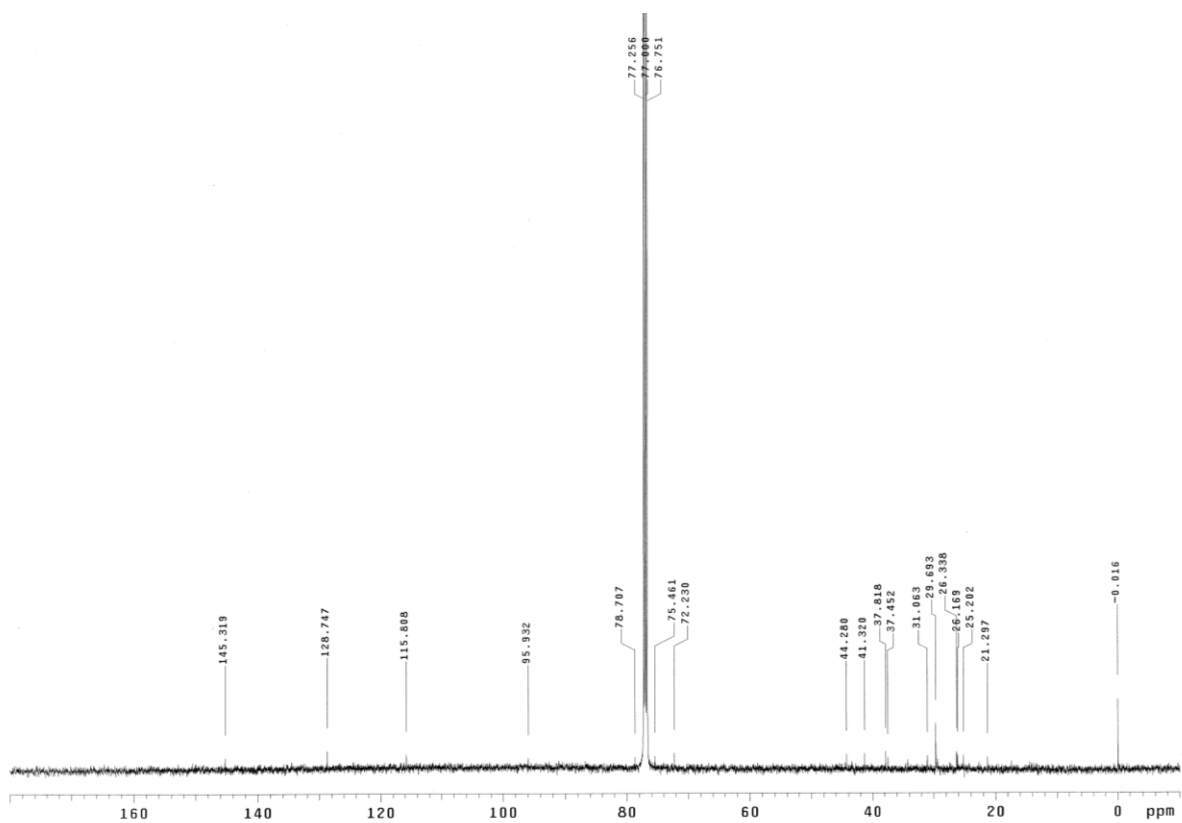

Figure S45. <sup>13</sup>C NMR spectrum of 7 in CDCl<sub>3</sub> at 125 MHz

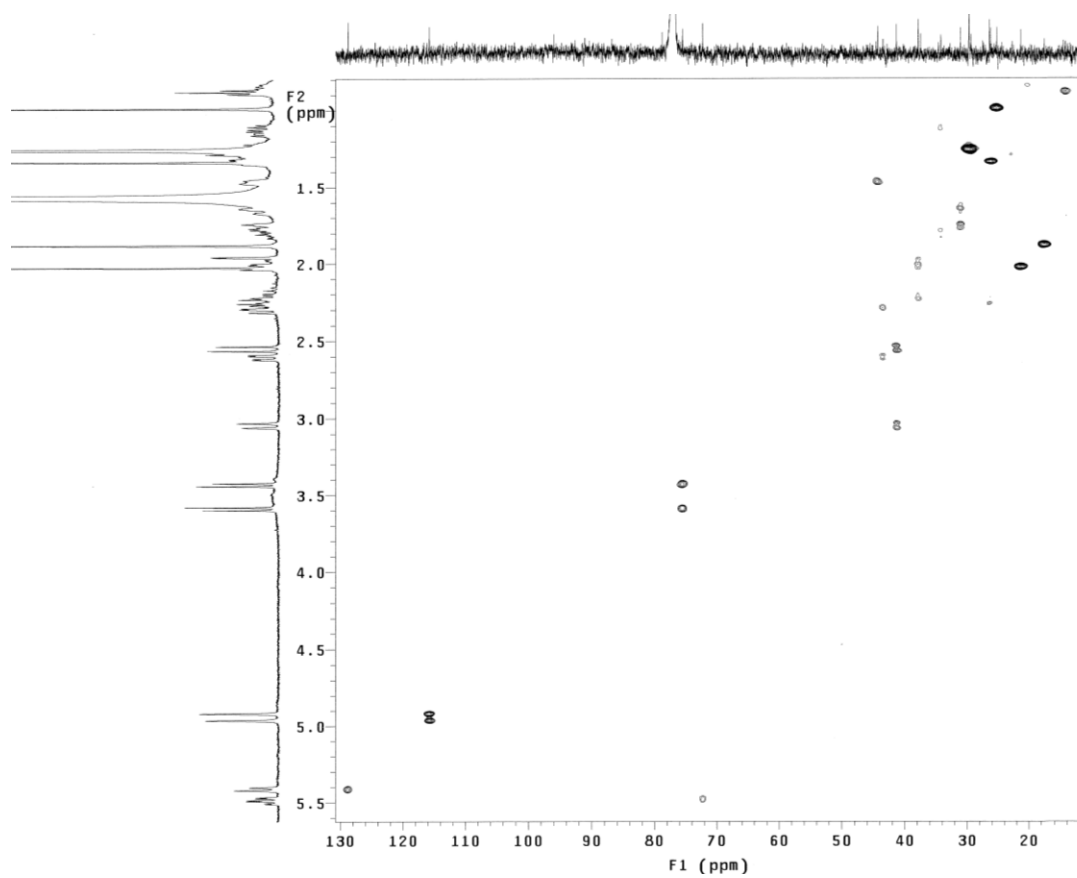

Figure S46. HSQC spectrum of 7 in CDCl<sub>3</sub>

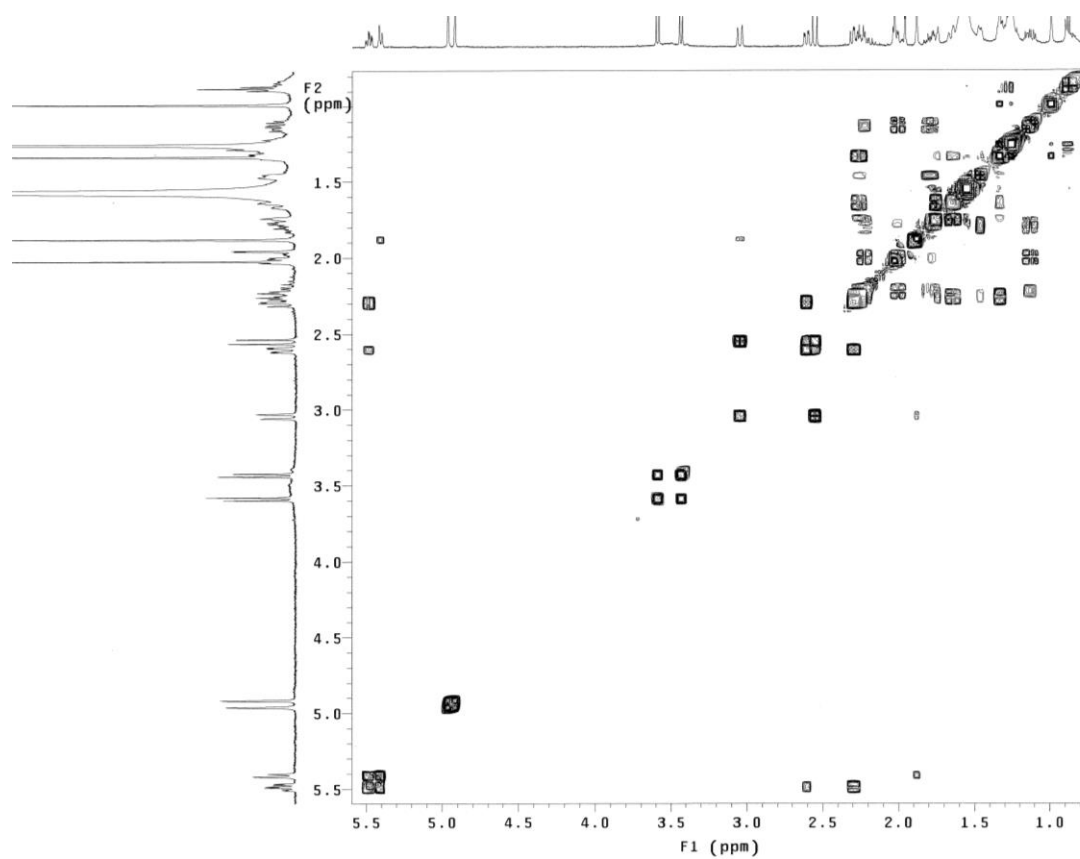

Figure S47. COSY spectrum of **7** in CDCl<sub>3</sub>

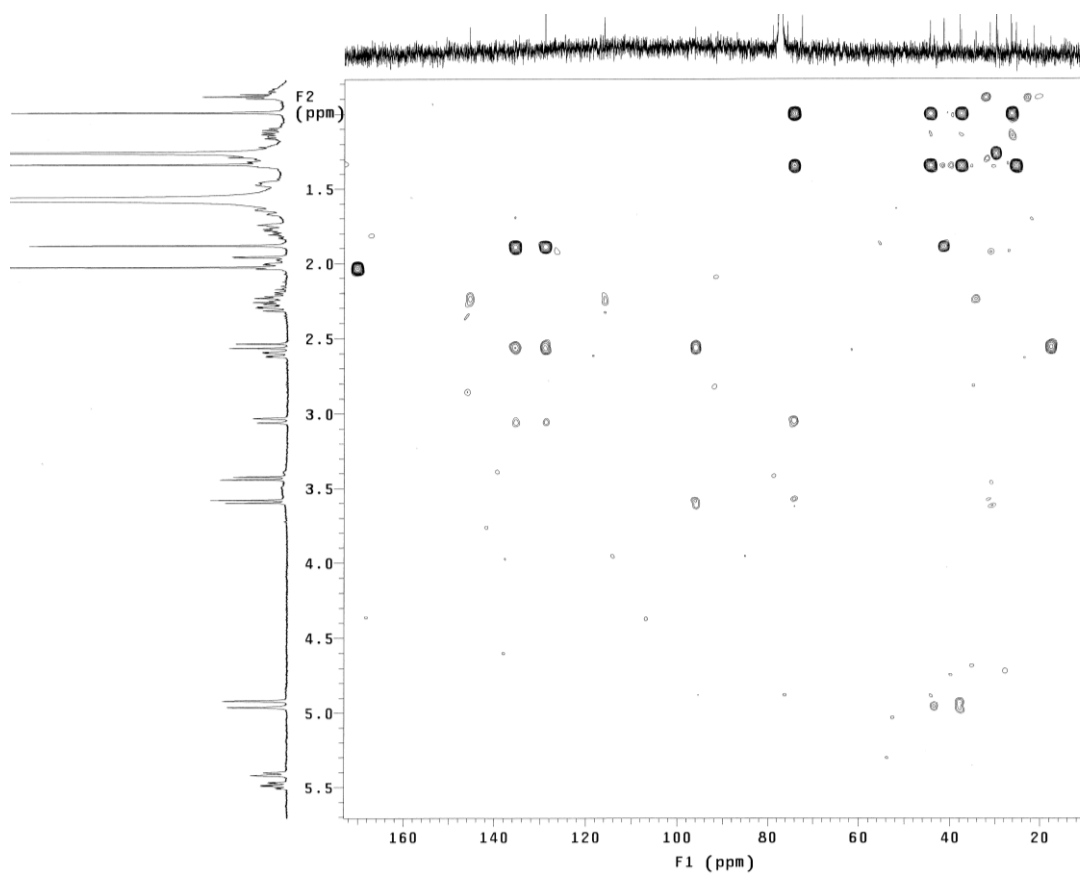

Figure S48. HMBC spectrum of **7** in CDCl<sub>3</sub>

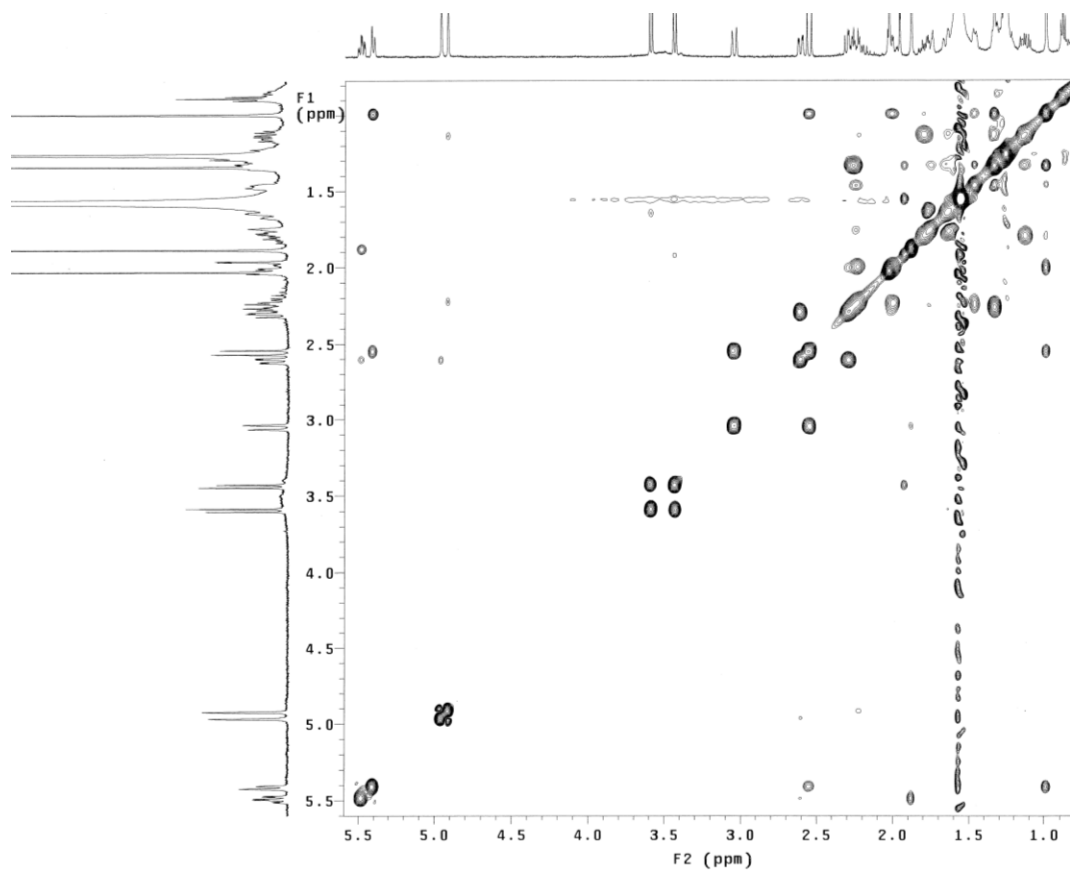

Figure S49. NOESY spectrum of 7 in  $\text{CDCl}_3$

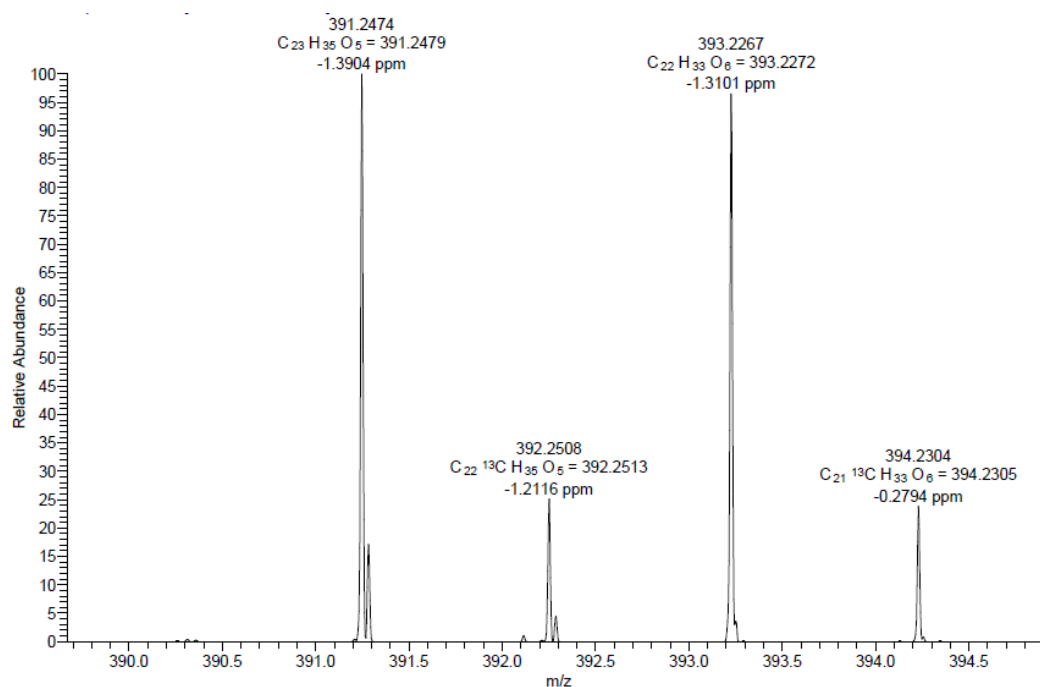

Figure S50. HRESIMS spectrum of 8



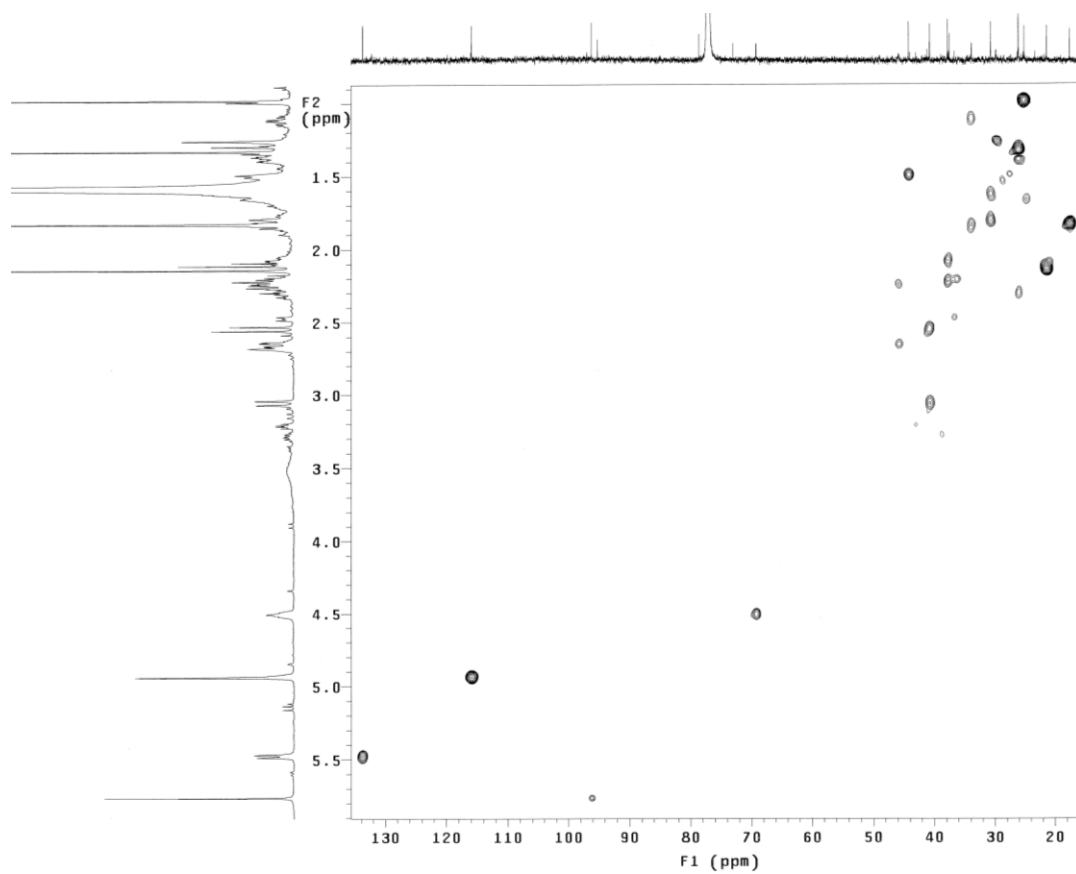

**Figure S53.** HSQC spectrum of **8** in  $\text{CDCl}_3$

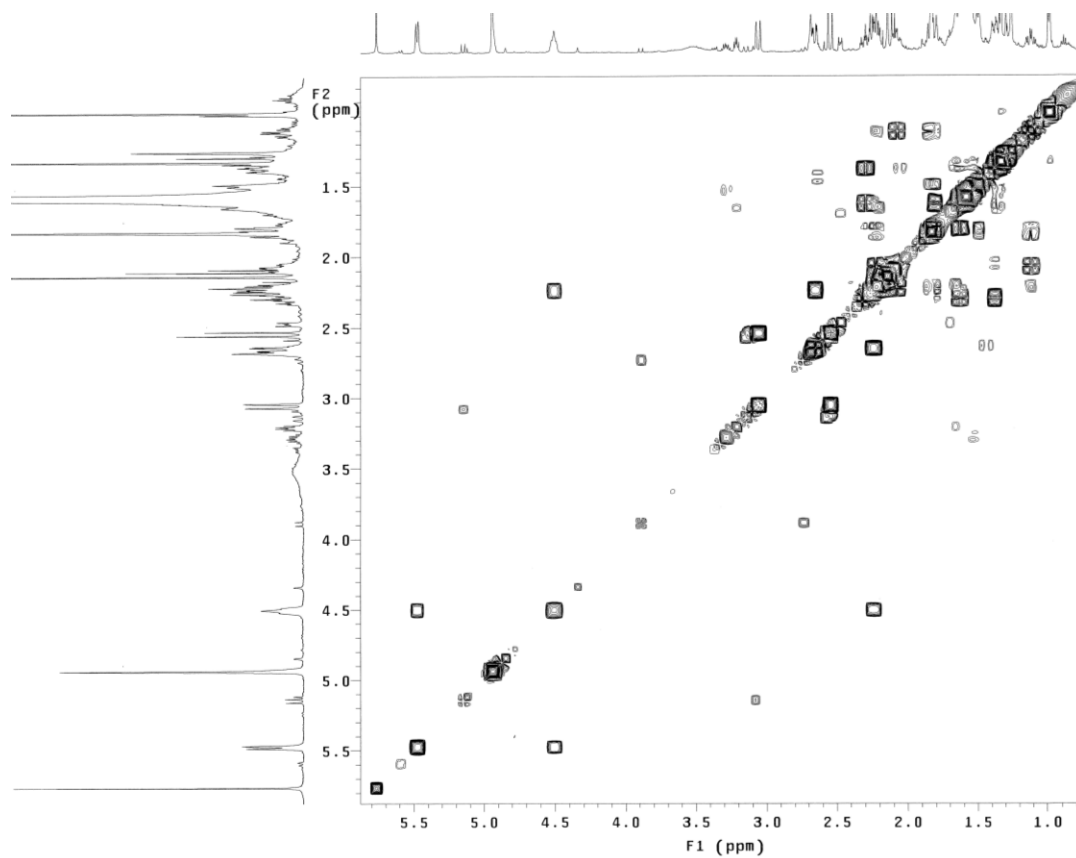

**Figure S54.** COSY spectrum of **8** in  $\text{CDCl}_3$



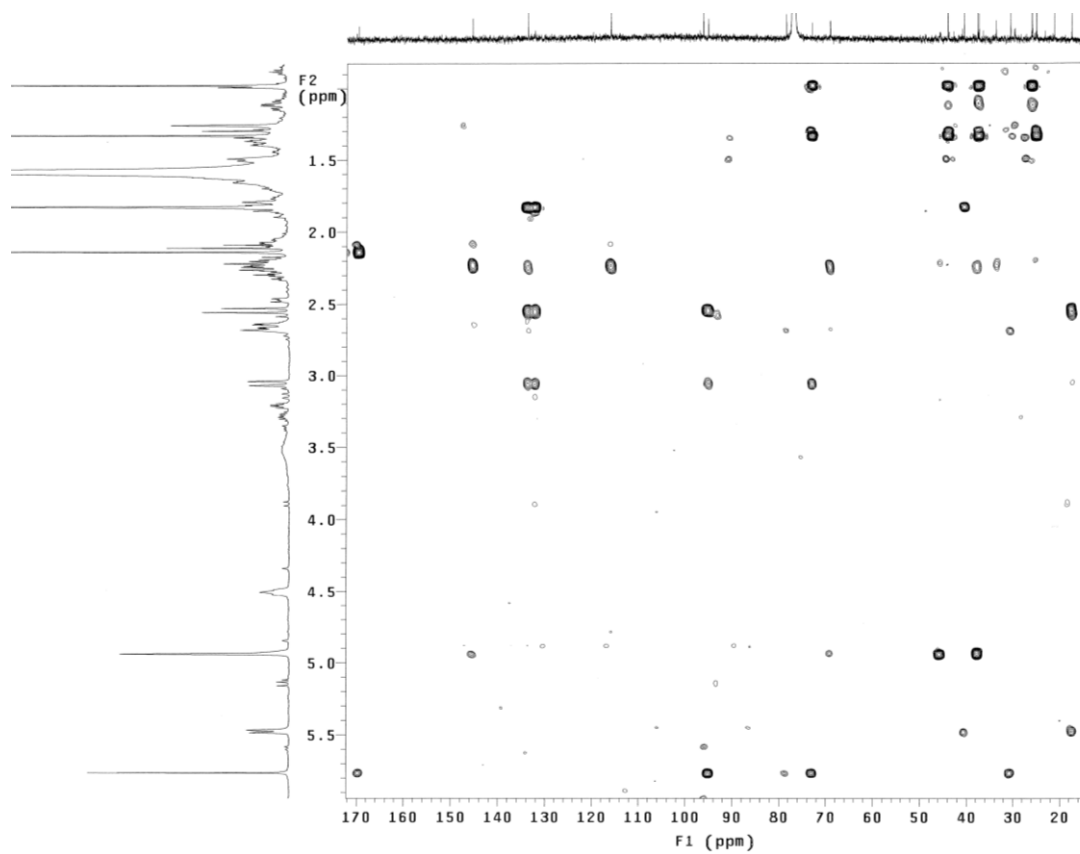

**Figure S55.** HMBC spectrum of **8** in  $\text{CDCl}_3$

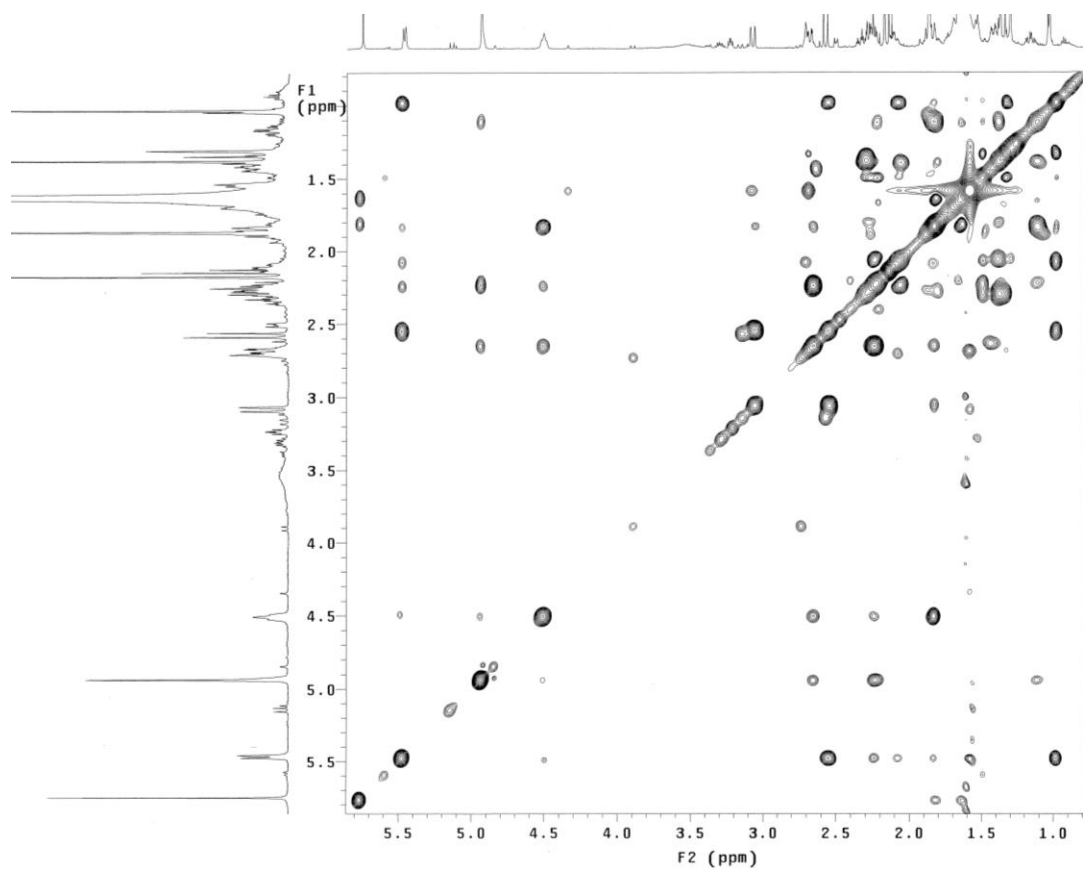

**Figure S56.** NOESY spectrum of **8** in  $\text{CDCl}_3$

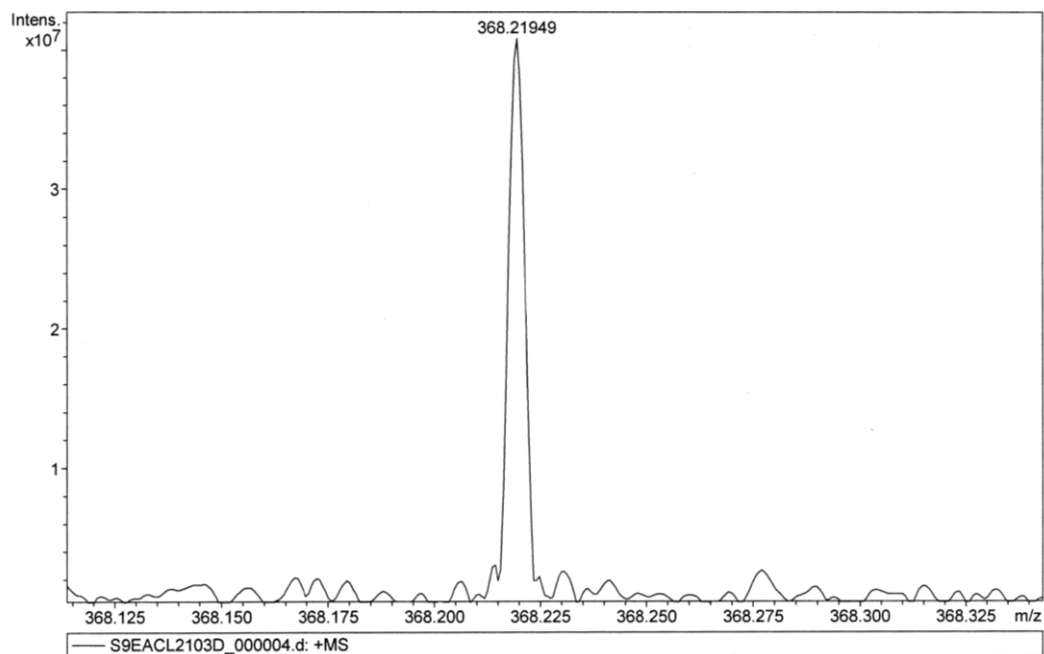

| Meas. m/z | # | Formula                                           | Score  | m/z       | err [mDa] | err [ppm] | mSigma | rdb | e <sup>-</sup> Conf | N-Rule |
|-----------|---|---------------------------------------------------|--------|-----------|-----------|-----------|--------|-----|---------------------|--------|
| 368.21949 | 1 | C <sub>21</sub> H <sub>31</sub> NNaO <sub>3</sub> | 100.00 | 368.21961 | 0.13      | 0.34      | 25.0   | 6.5 | even                | ok     |

Figure S57. HRESIMS spectrum of 9

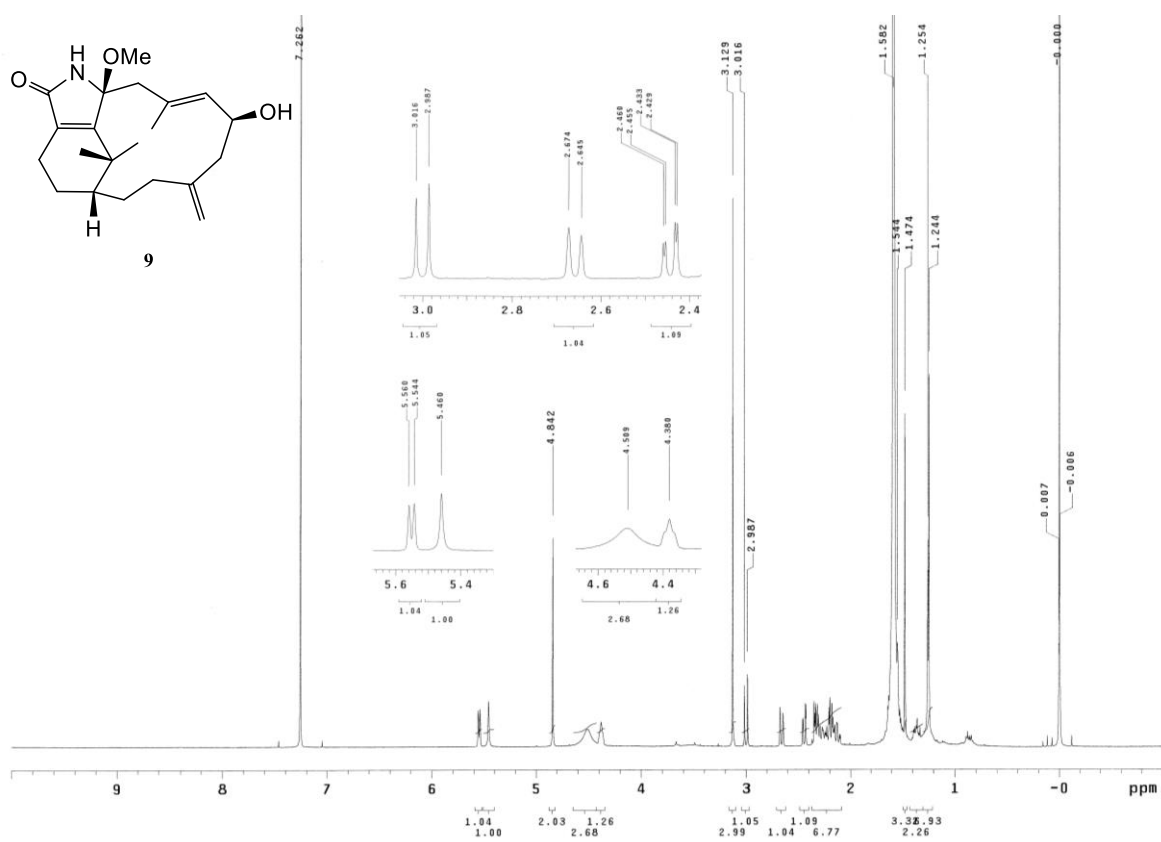

Figure S58. <sup>1</sup>H NMR spectrum of 9 in CDCl<sub>3</sub> at 500 MHz

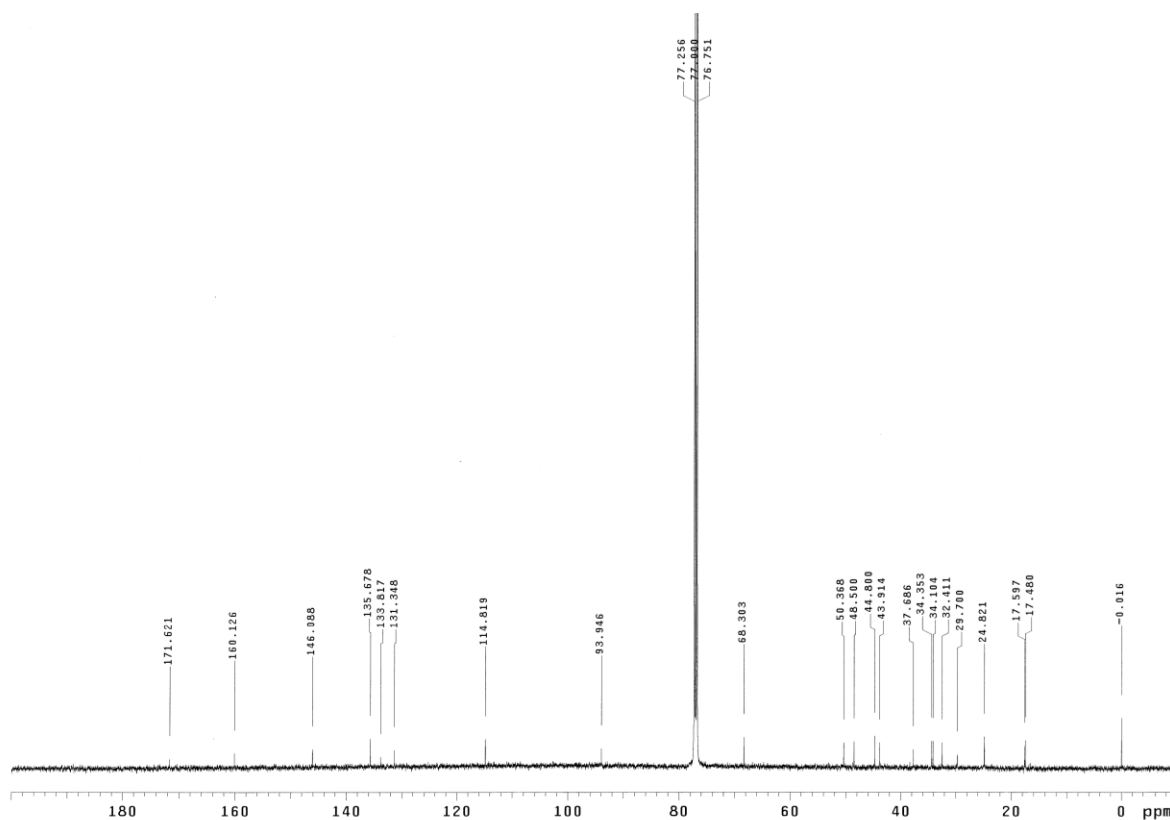

Figure S59. <sup>13</sup>C NMR spectrum of **9** in CDCl<sub>3</sub> at 125 MHz

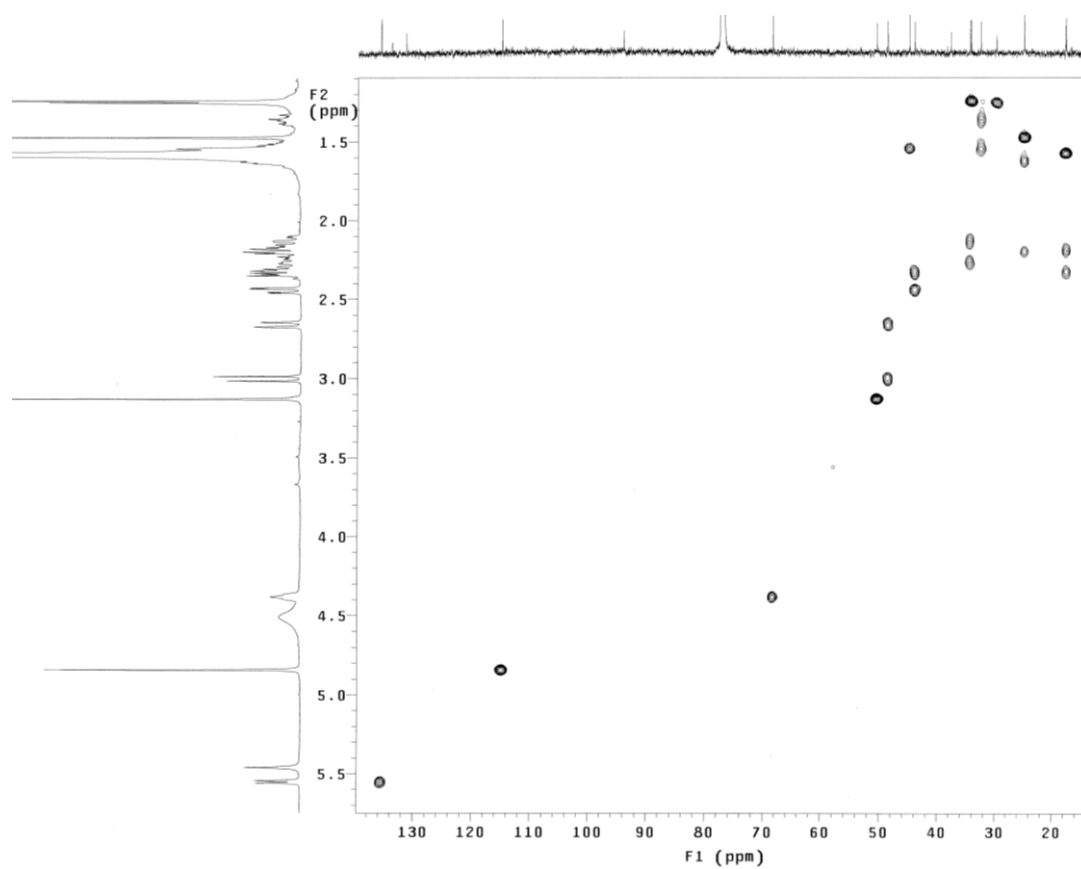

Figure S60. HSQC spectrum of **9** in CDCl<sub>3</sub>

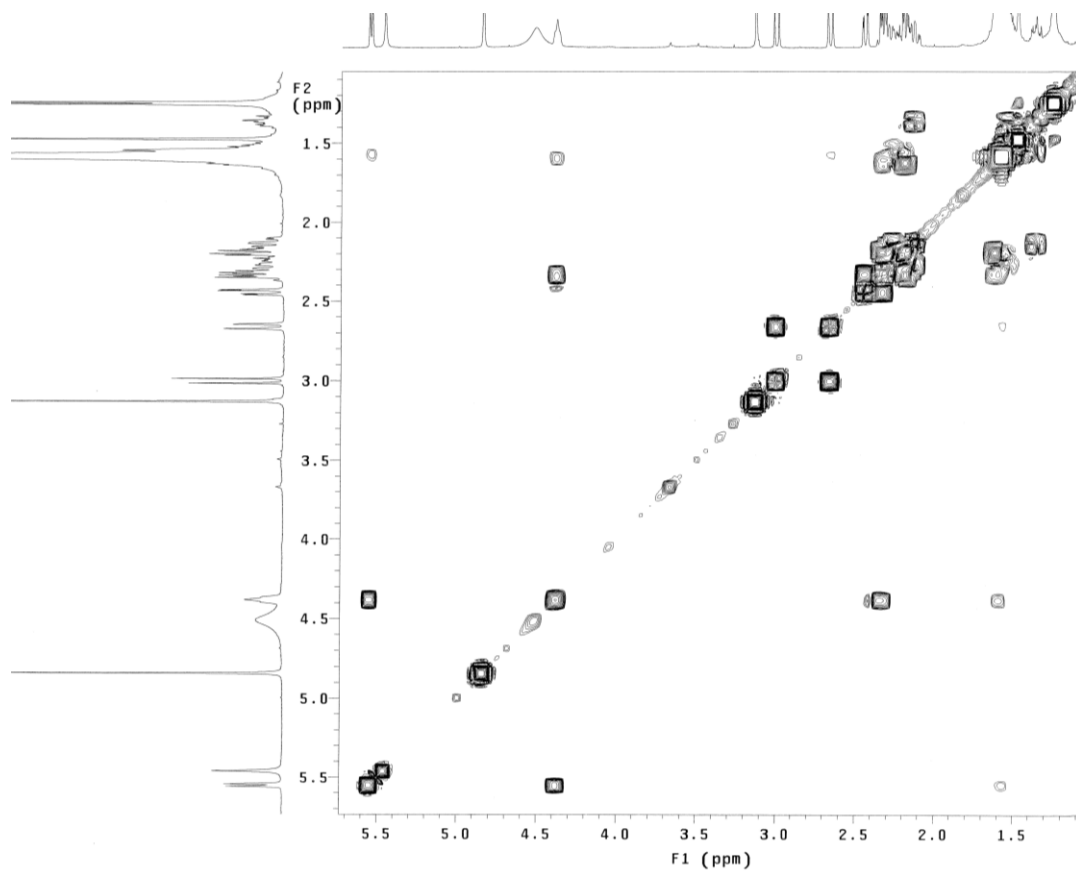

**Figure S61.** COSY spectrum of **9** in  $\text{CDCl}_3$

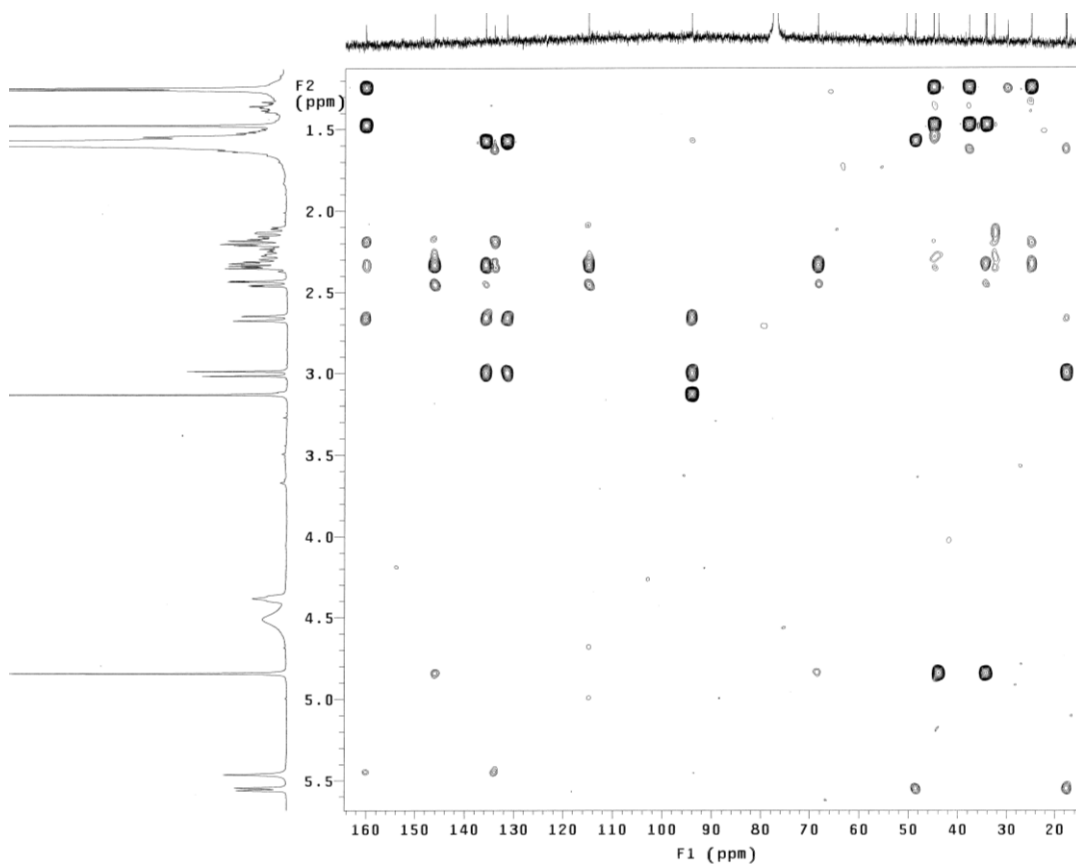

**Figure S62.** HMBC spectrum of **9** in  $\text{CDCl}_3$

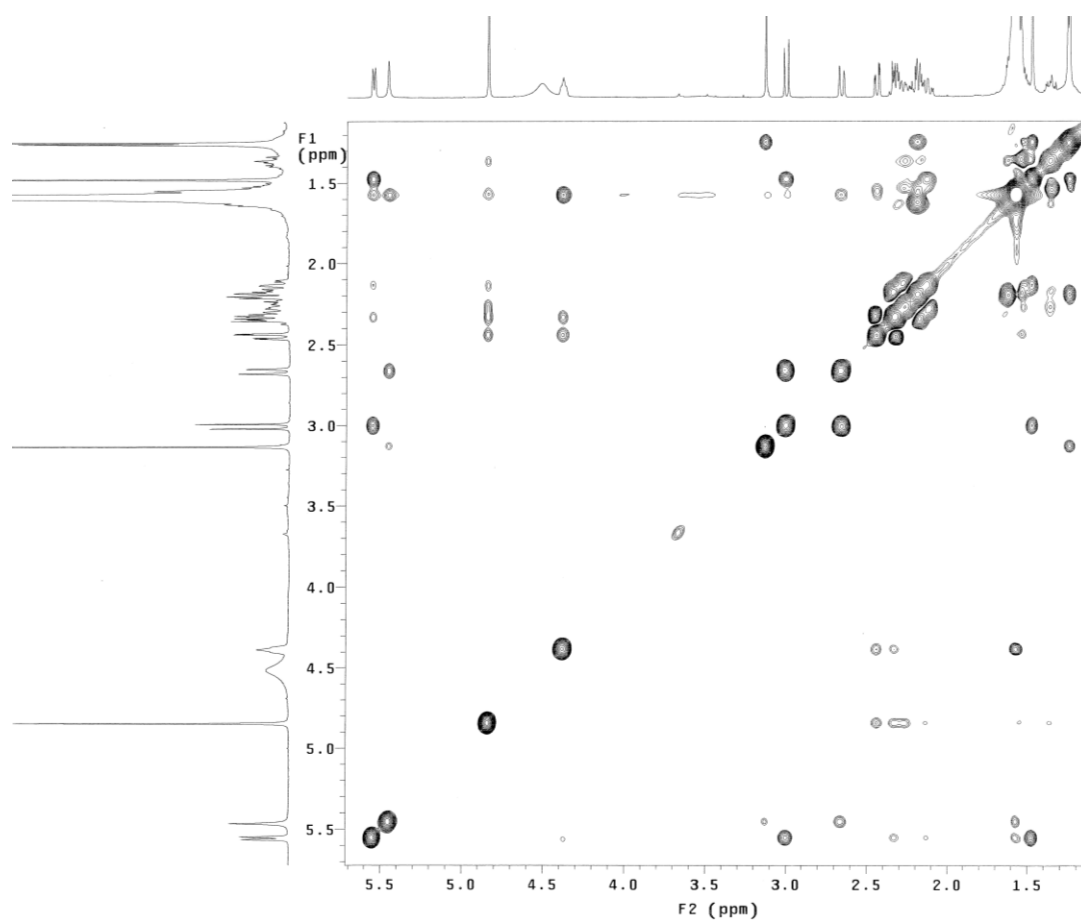

Figure S63. NOESY spectrum of **9** in  $\text{CDCl}_3$

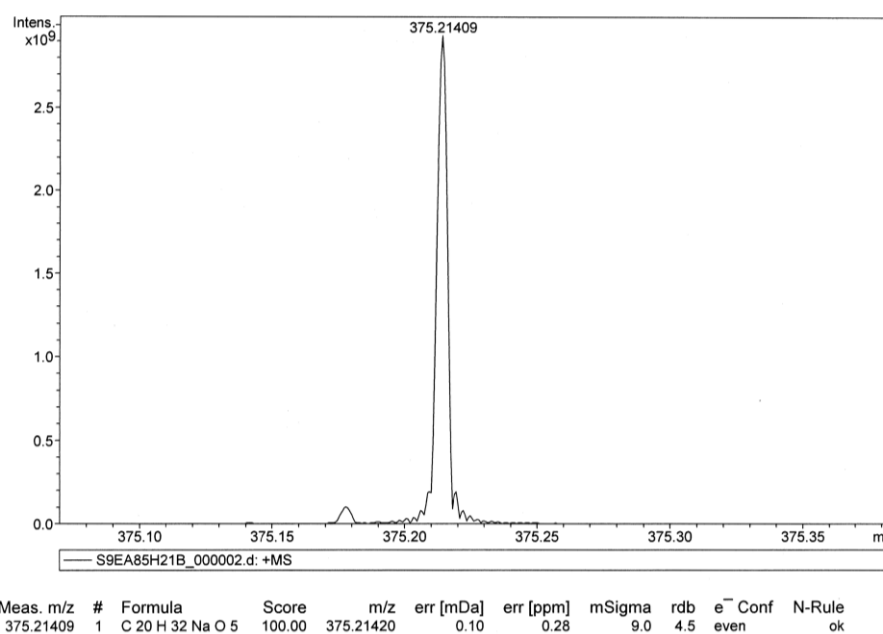

Figure S64. HRESIMS spectrum of **10**

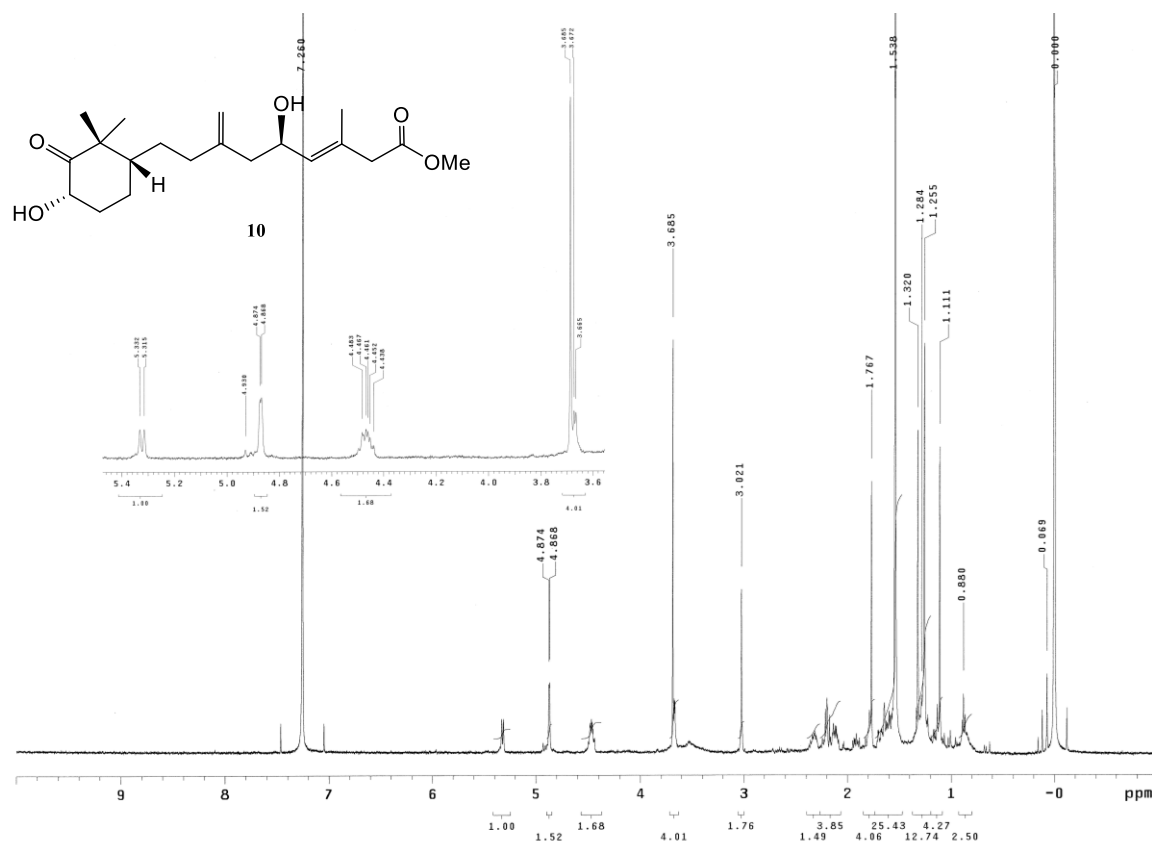

Figure S65. <sup>1</sup>H NMR spectrum of 10 in CDCl<sub>3</sub> at 500 MHz

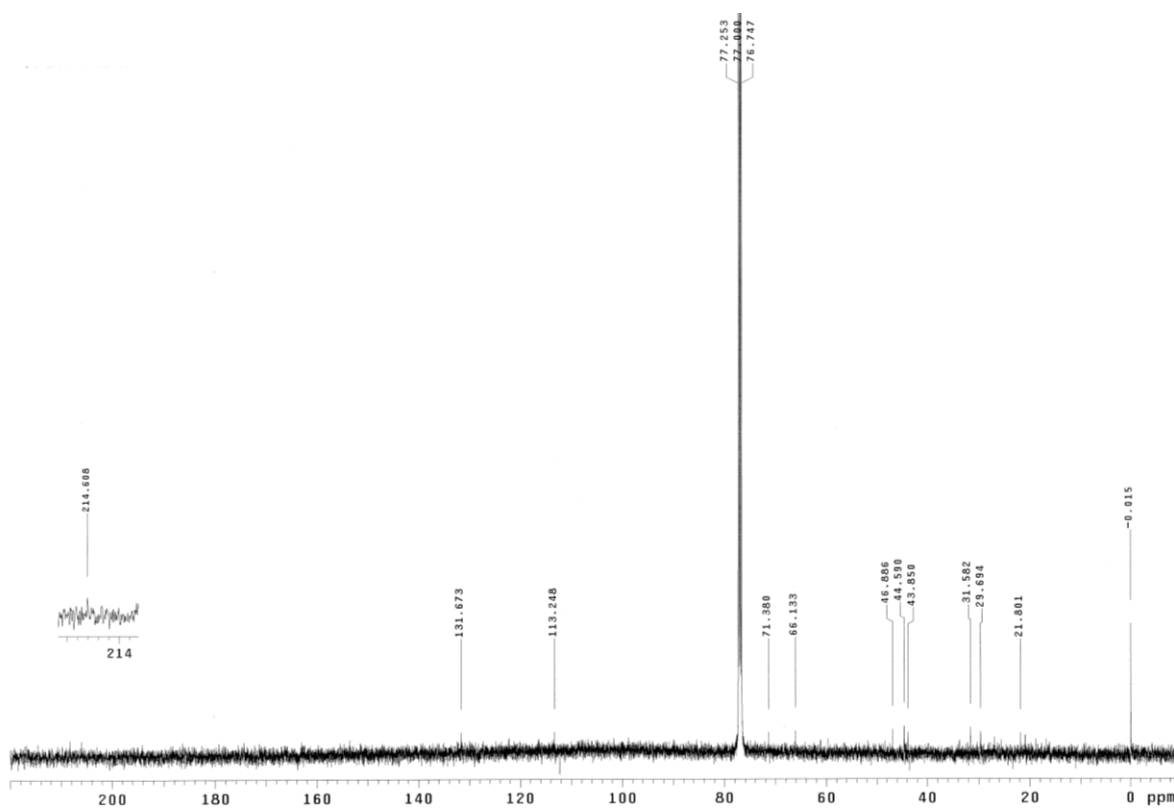

Figure S66. <sup>13</sup>C NMR spectrum of 10 in CDCl<sub>3</sub> at 125 MHz

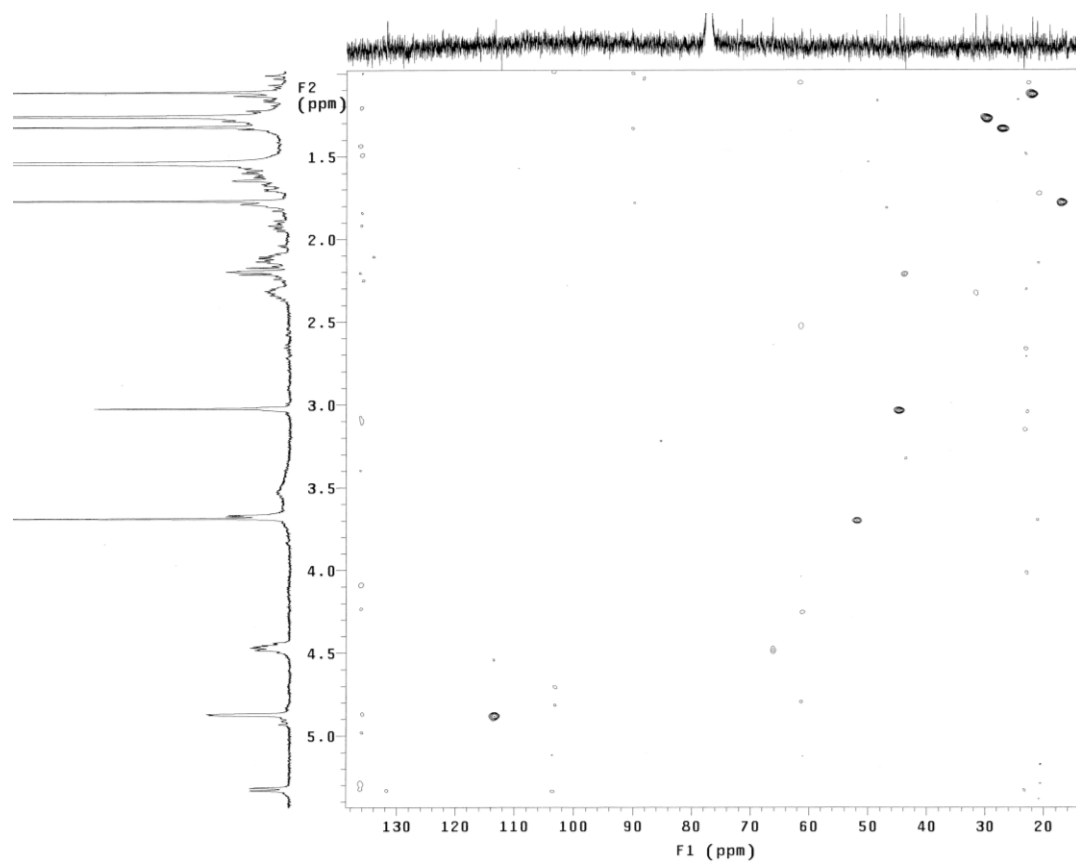

Figure S67. HSQC spectrum of **10** in  $\text{CDCl}_3$

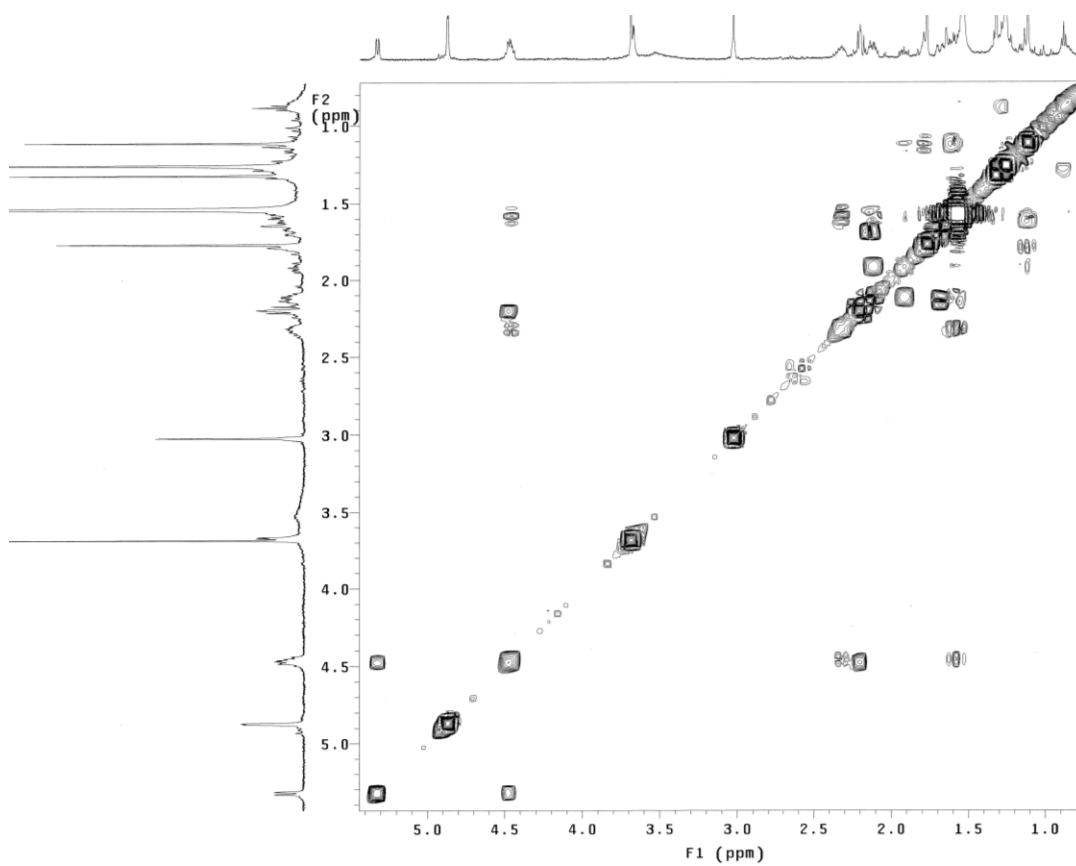

Figure S68. COSY spectrum of **10** in  $\text{CDCl}_3$

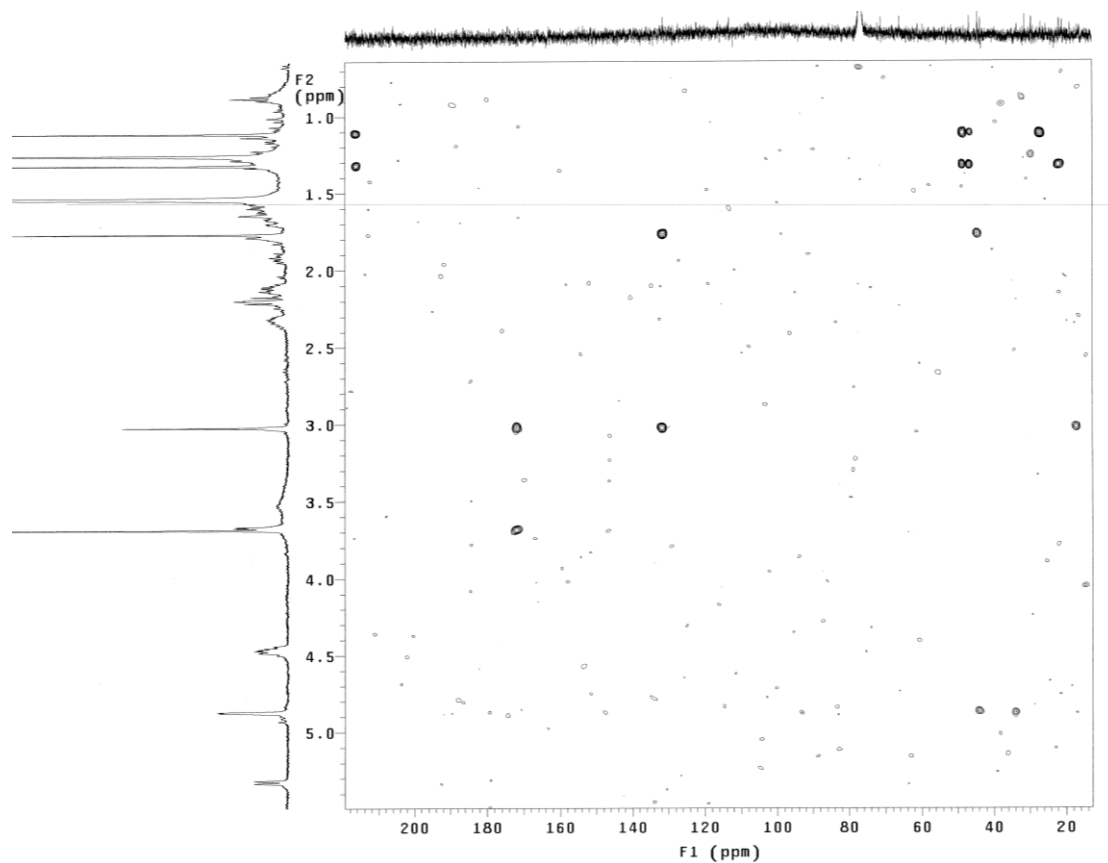

**Figure S69.** HMBC spectrum of **10** in CDCl<sub>3</sub>

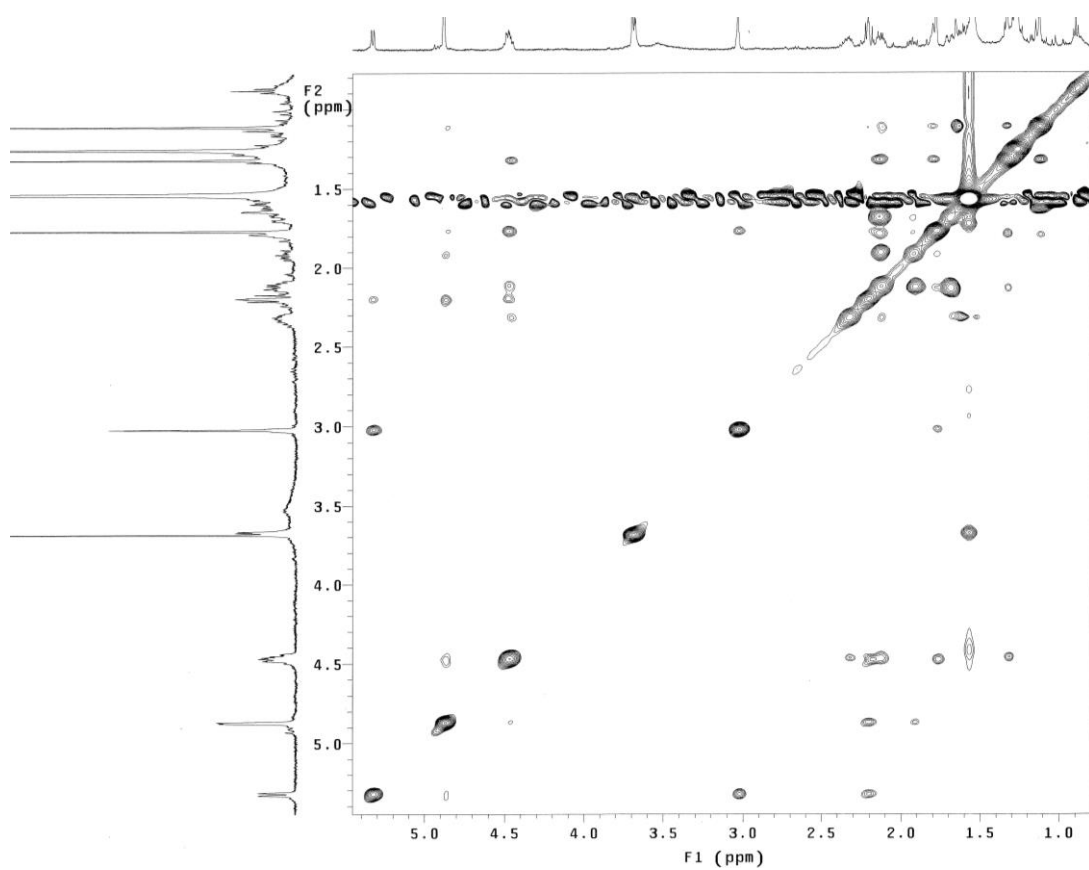

**Figure S70.** NOESY spectrum of **10** in CDCl<sub>3</sub>



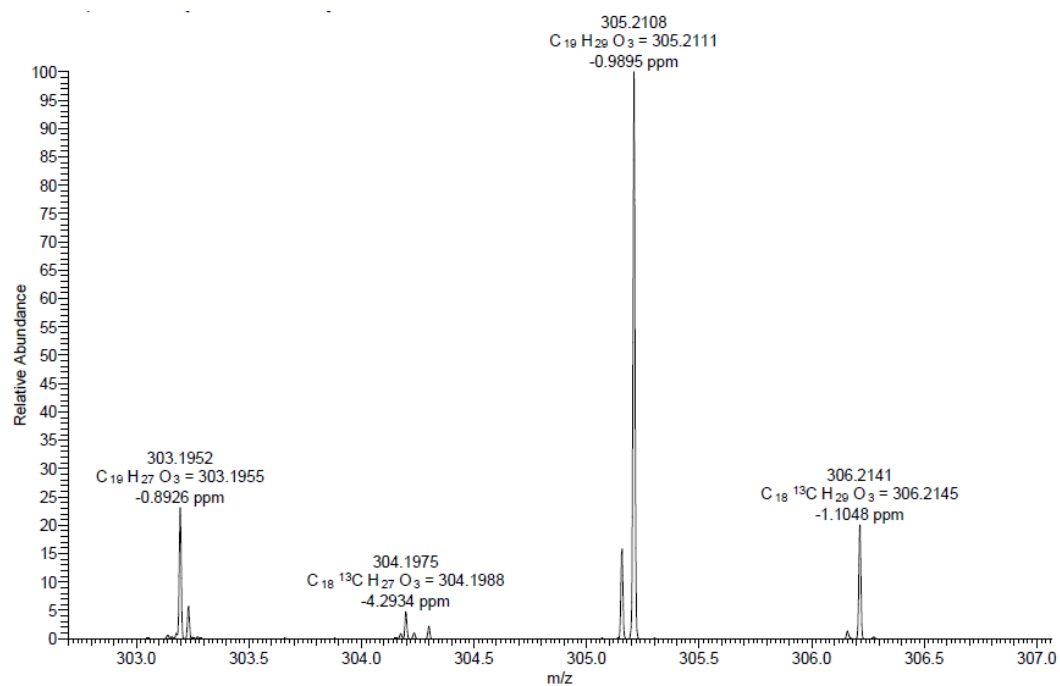

Figure S71. HRESIMS spectrum of **11**

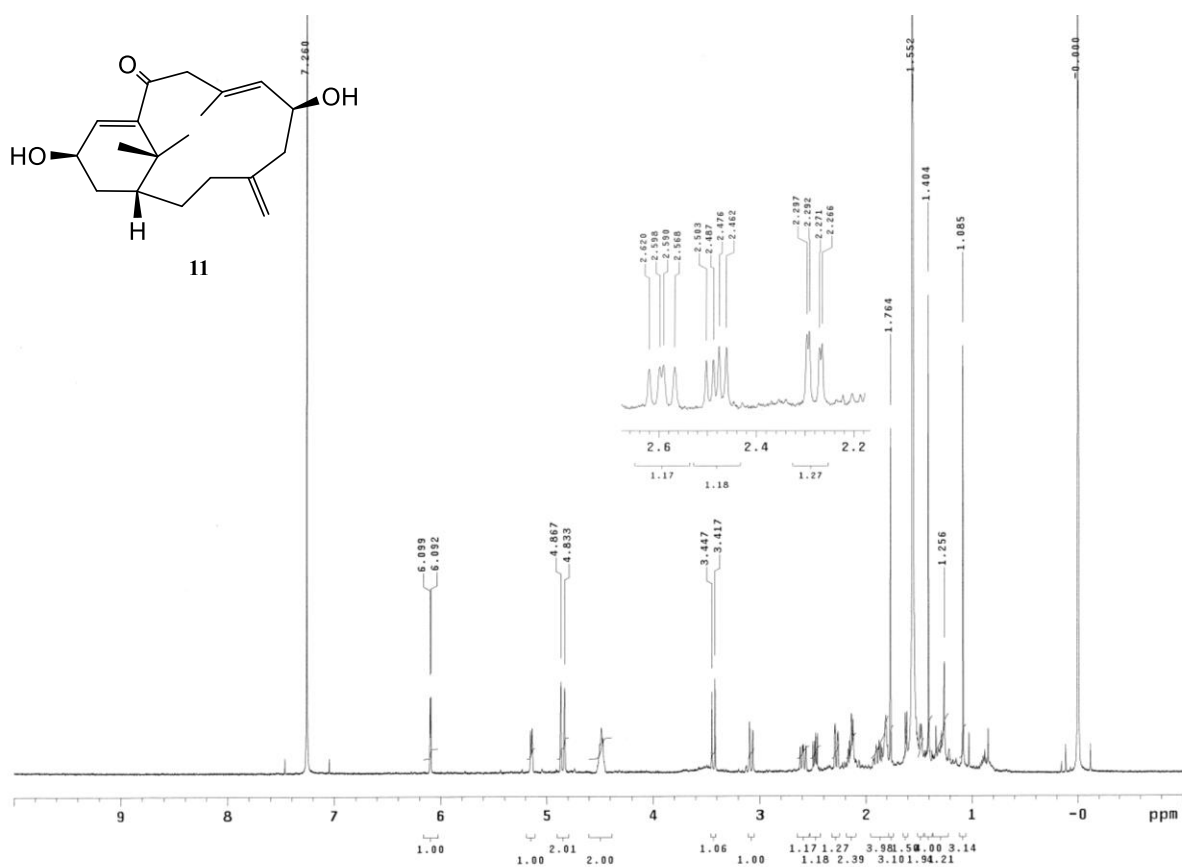

Figure S72.  $^1H$  NMR spectrum of **11** in  $CDCl_3$  at 500 MHz

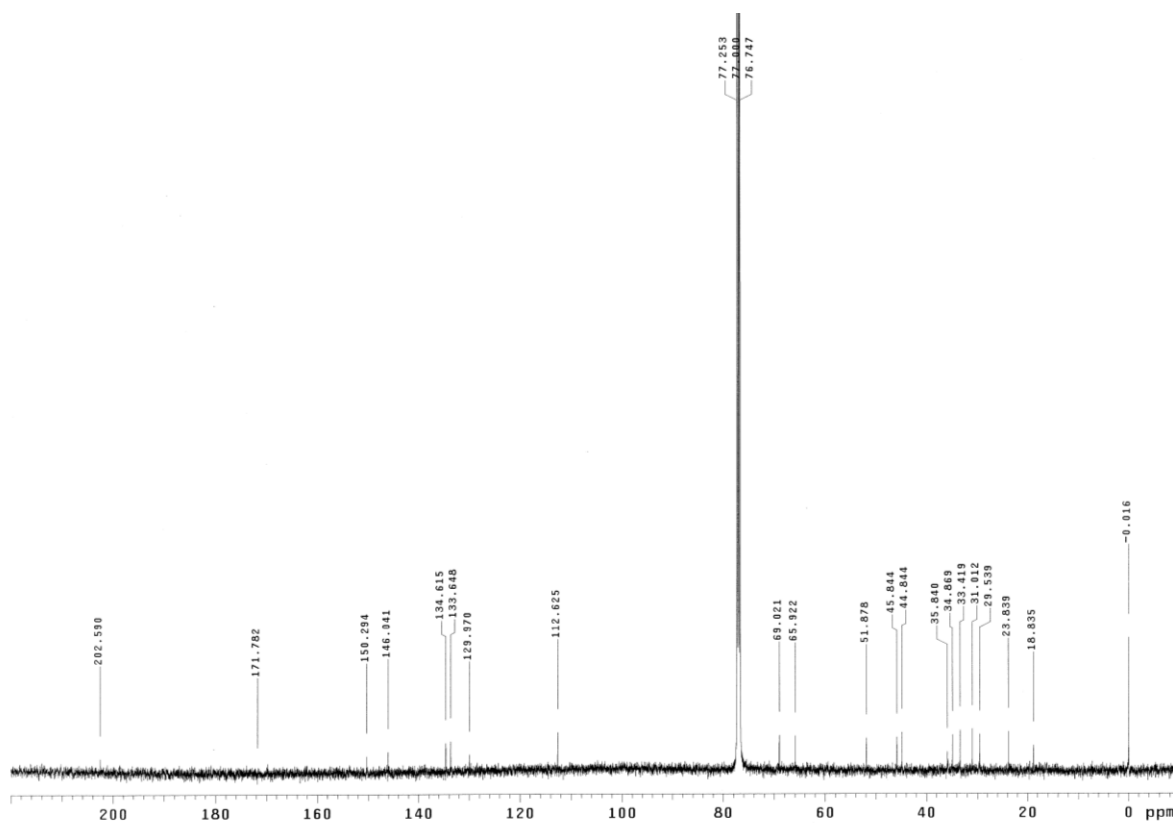

Figure S73. <sup>13</sup>C NMR spectrum of **11** in CDCl<sub>3</sub> at 125 MHz

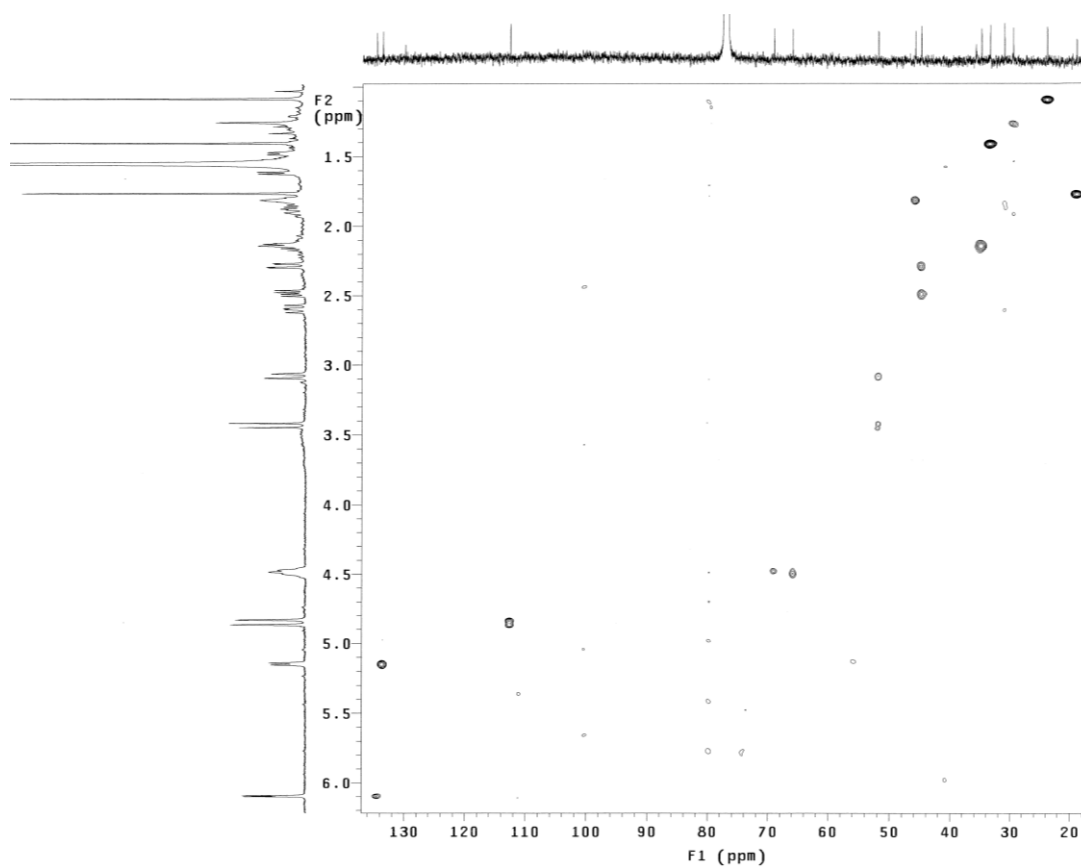

Figure S74. HSQC spectrum of **11** in CDCl<sub>3</sub>

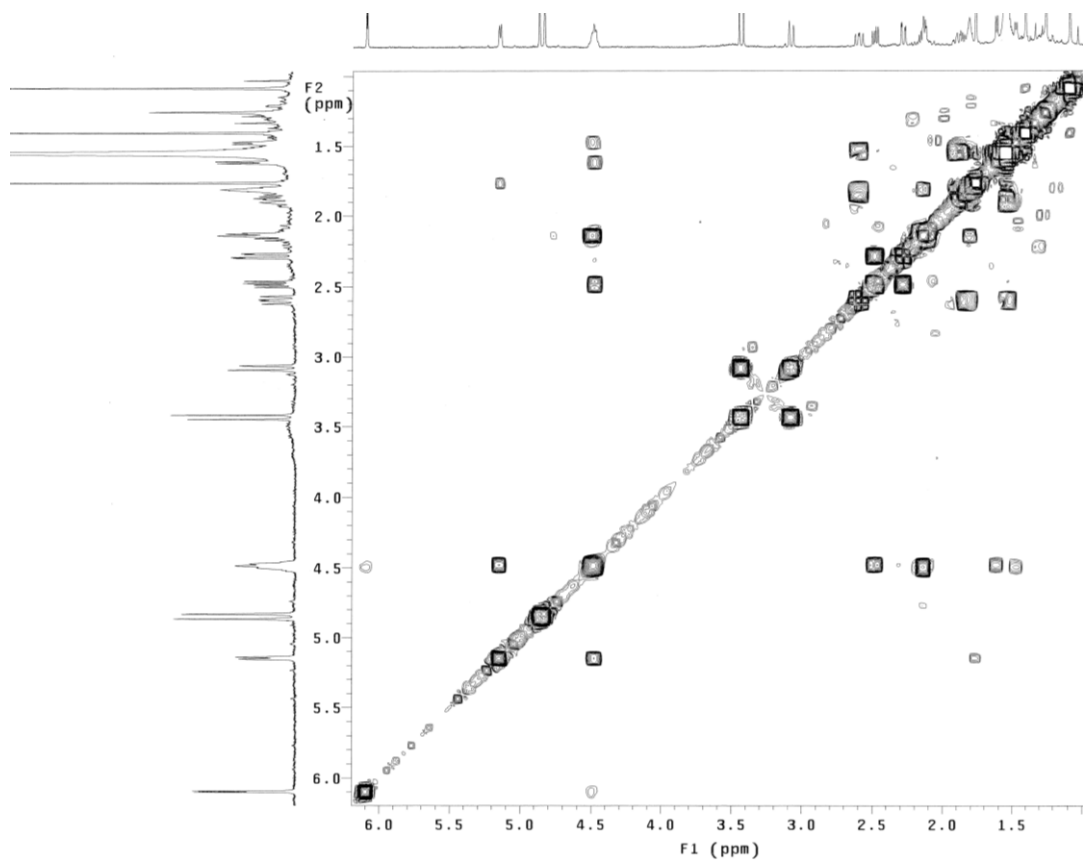

Figure S75. COSY spectrum of **11** in CDCl<sub>3</sub>

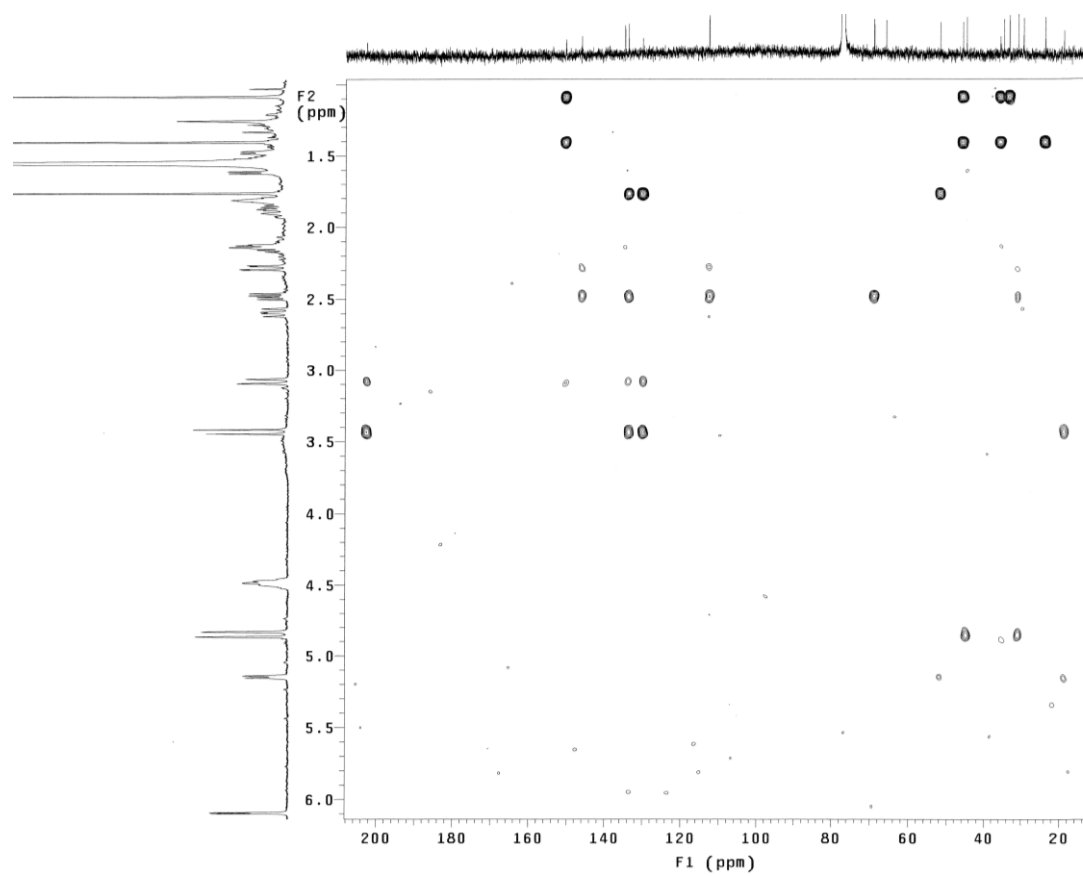

Figure S76. HMBC spectrum of **11** in CDCl<sub>3</sub>

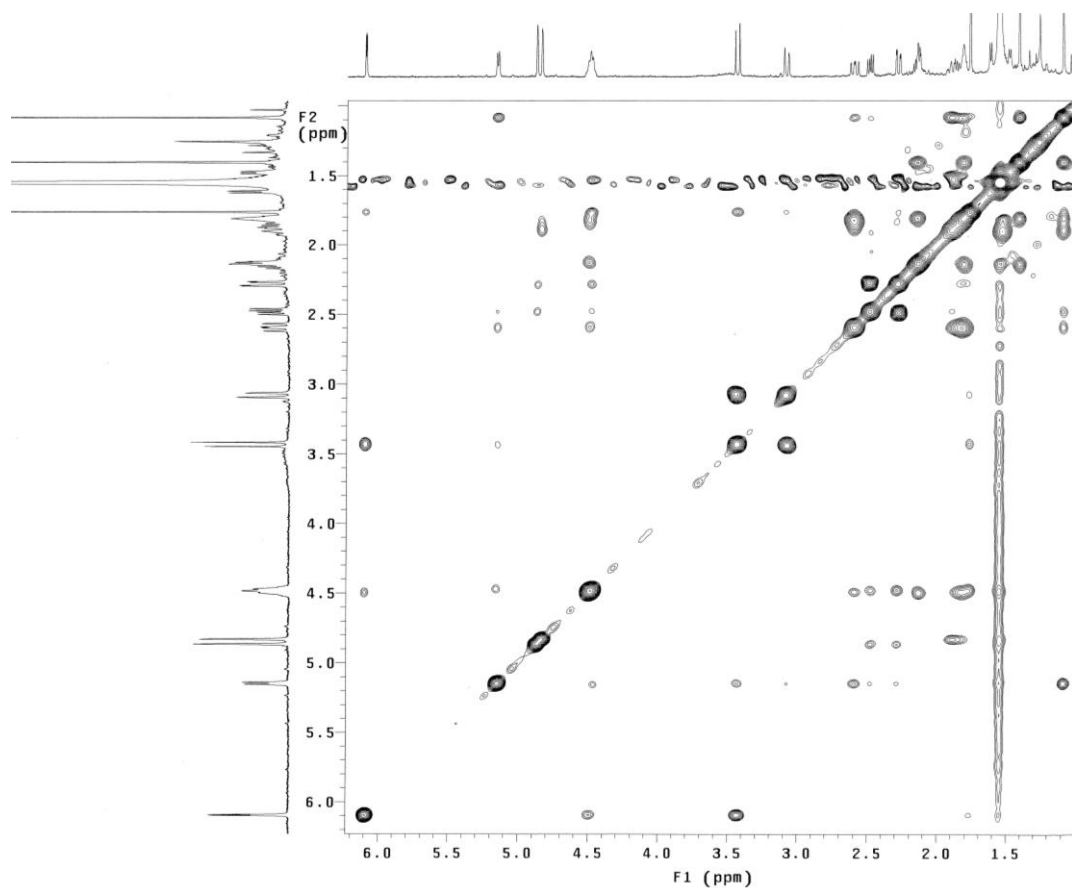

Figure S77. NOESY spectrum of **11** in  $\text{CDCl}_3$

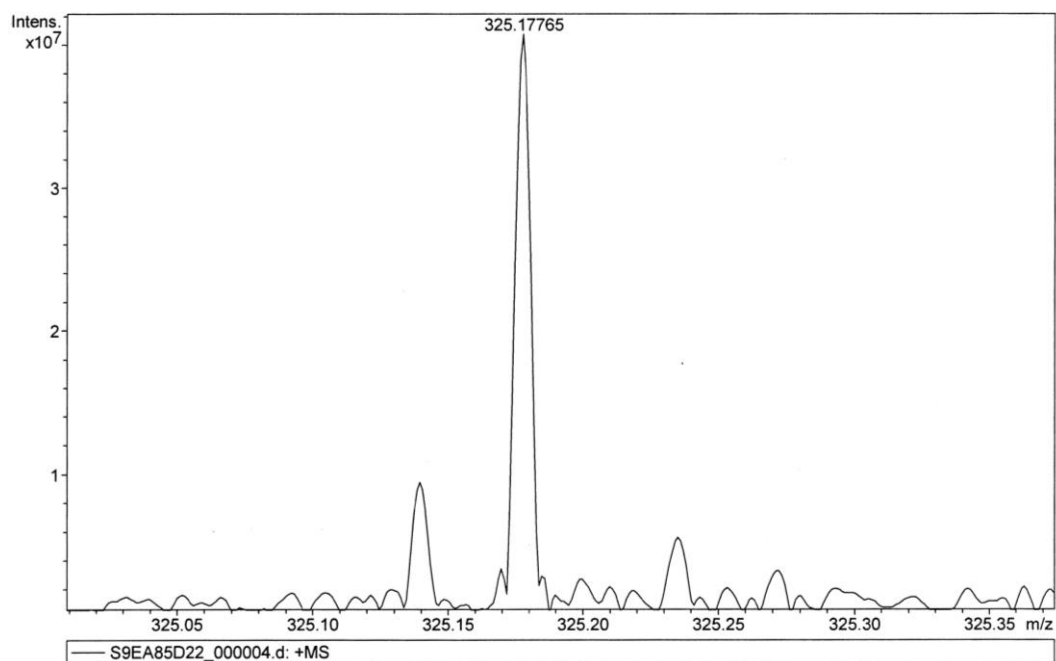

| Meas. m/z | # | Formula                                          | Score  | m/z       | err [mDa] | err [ppm] | mSigma | rdb | e <sup>-</sup> Conf | N-Rule |
|-----------|---|--------------------------------------------------|--------|-----------|-----------|-----------|--------|-----|---------------------|--------|
| 325.17765 | 1 | C <sub>19</sub> H <sub>26</sub> NaO <sub>3</sub> | 100.00 | 325.17742 | -0.24     | -0.73     | 15.1   | 6.5 | even                | ok     |

Figure S78. HRESIMS spectrum of **12**

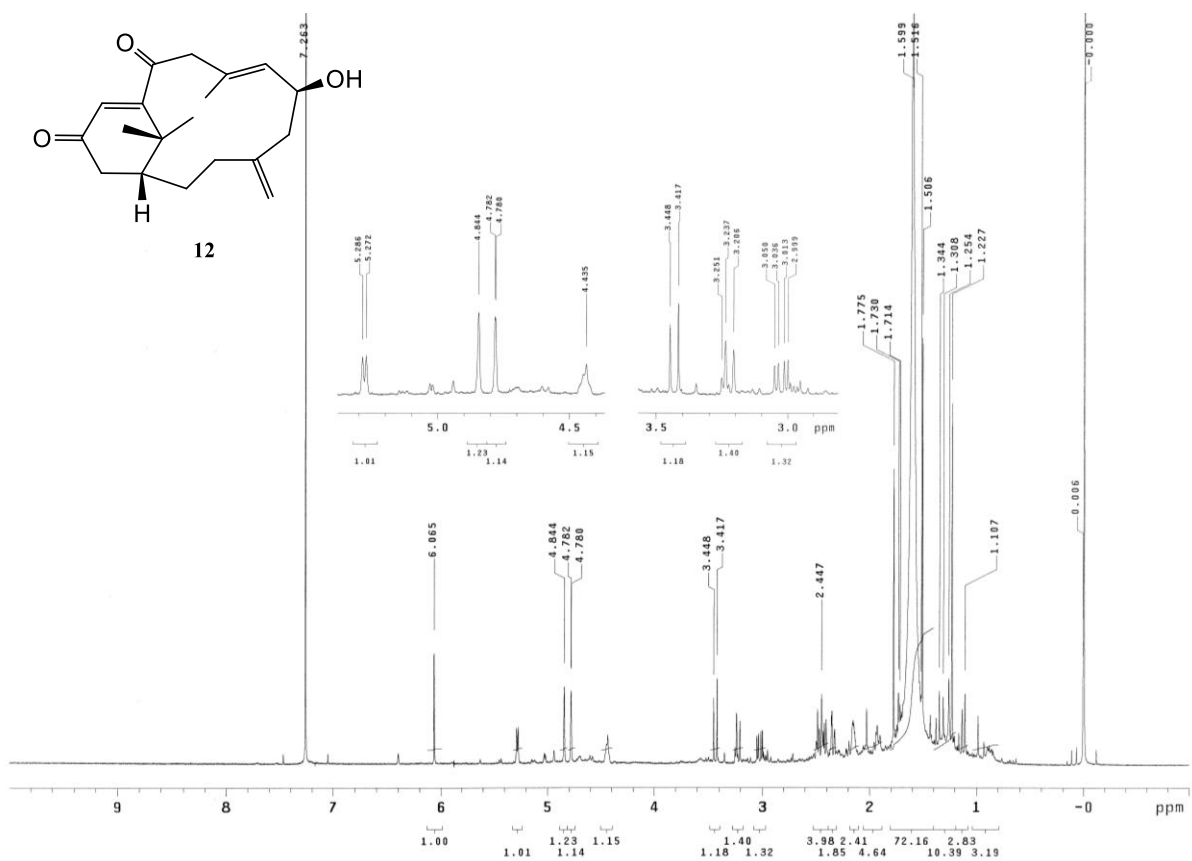

Figure S79. <sup>1</sup>H NMR spectrum of 12 in CDCl<sub>3</sub> at 500 MHz

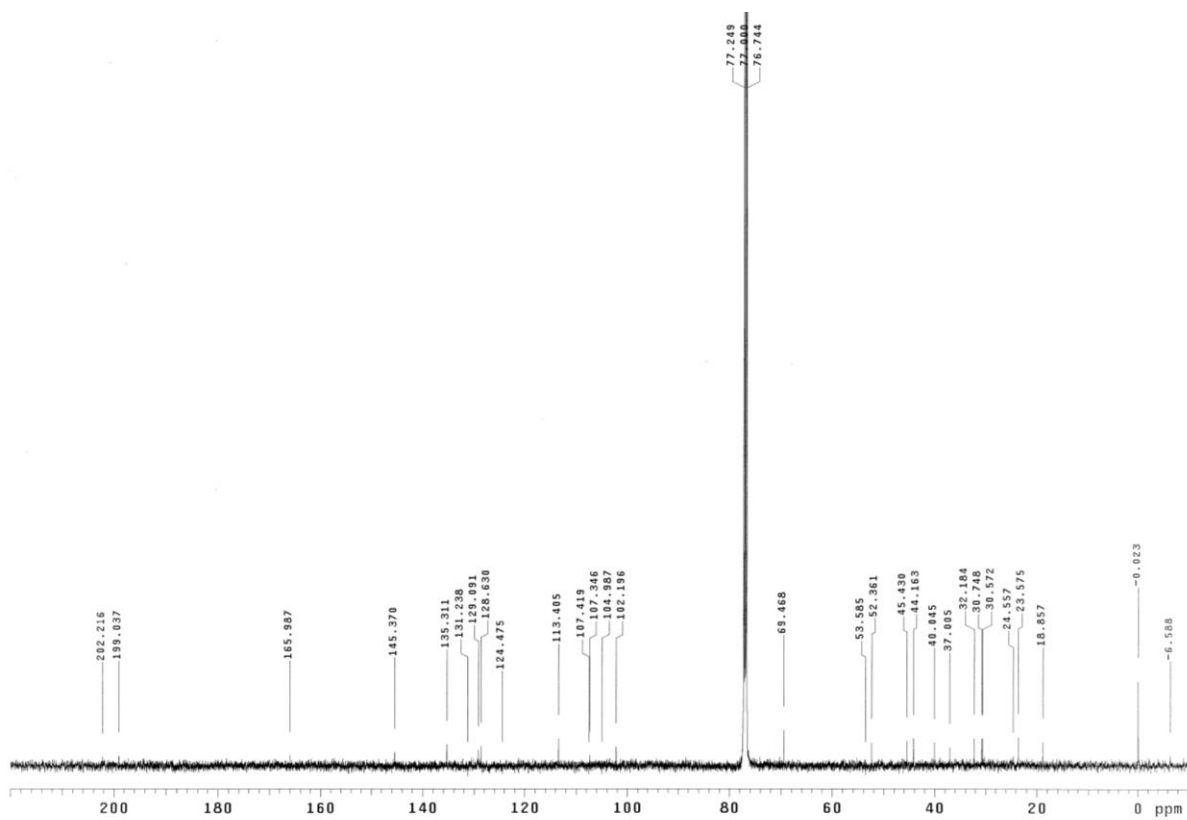

Figure S80. <sup>13</sup>C NMR spectrum of 12 in CDCl<sub>3</sub> at 125 MHz

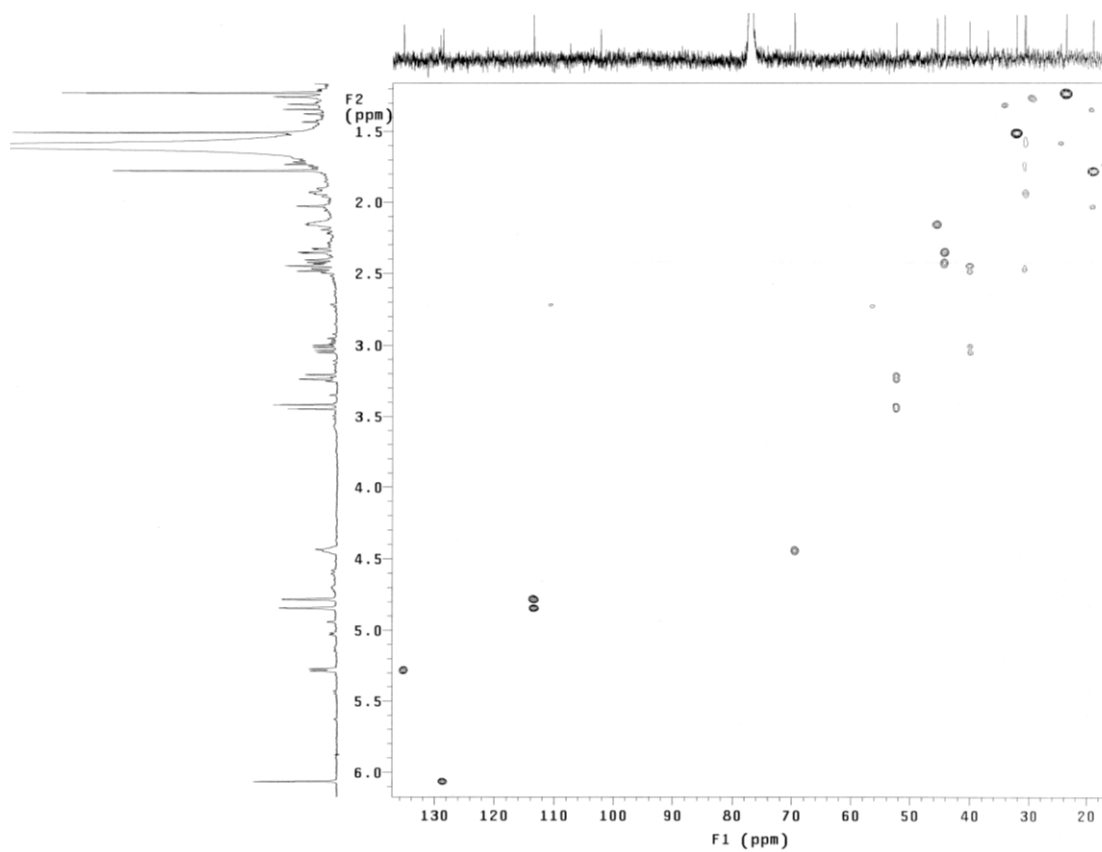

Figure S81. HSQC spectrum of **12** in CDCl<sub>3</sub>

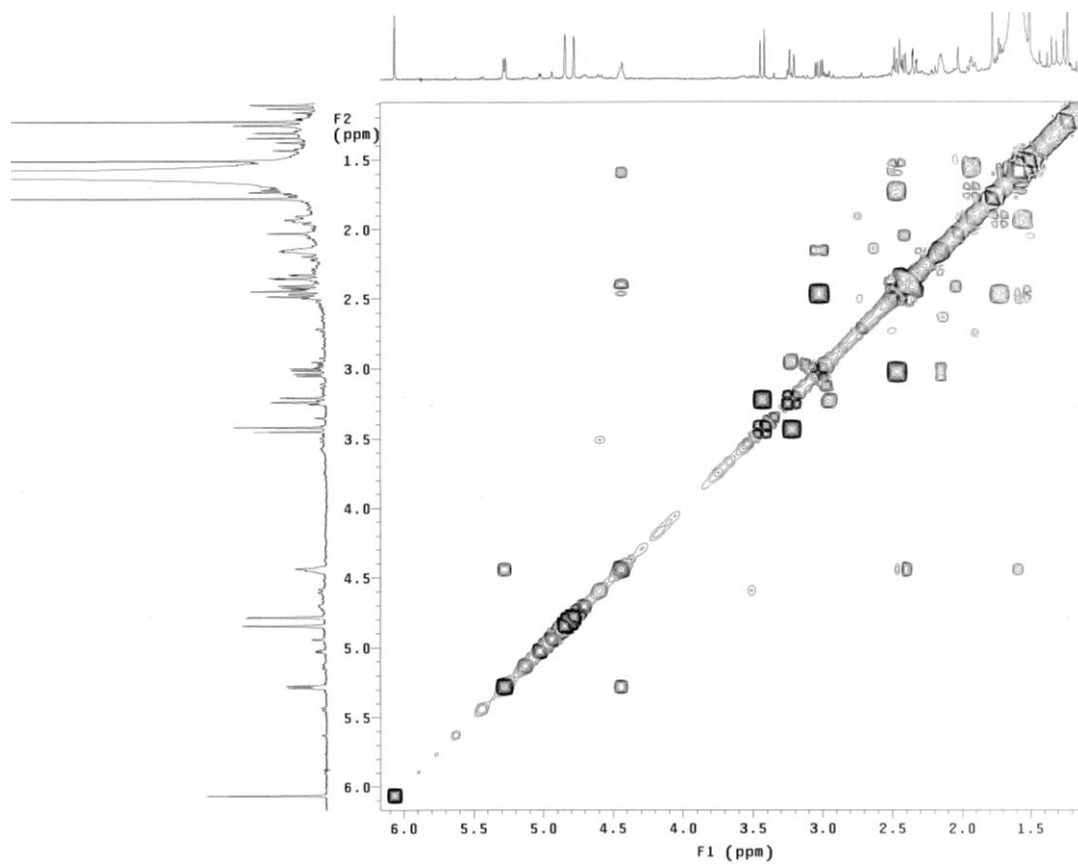

Figure S82. COSY spectrum of **12** in CDCl<sub>3</sub>

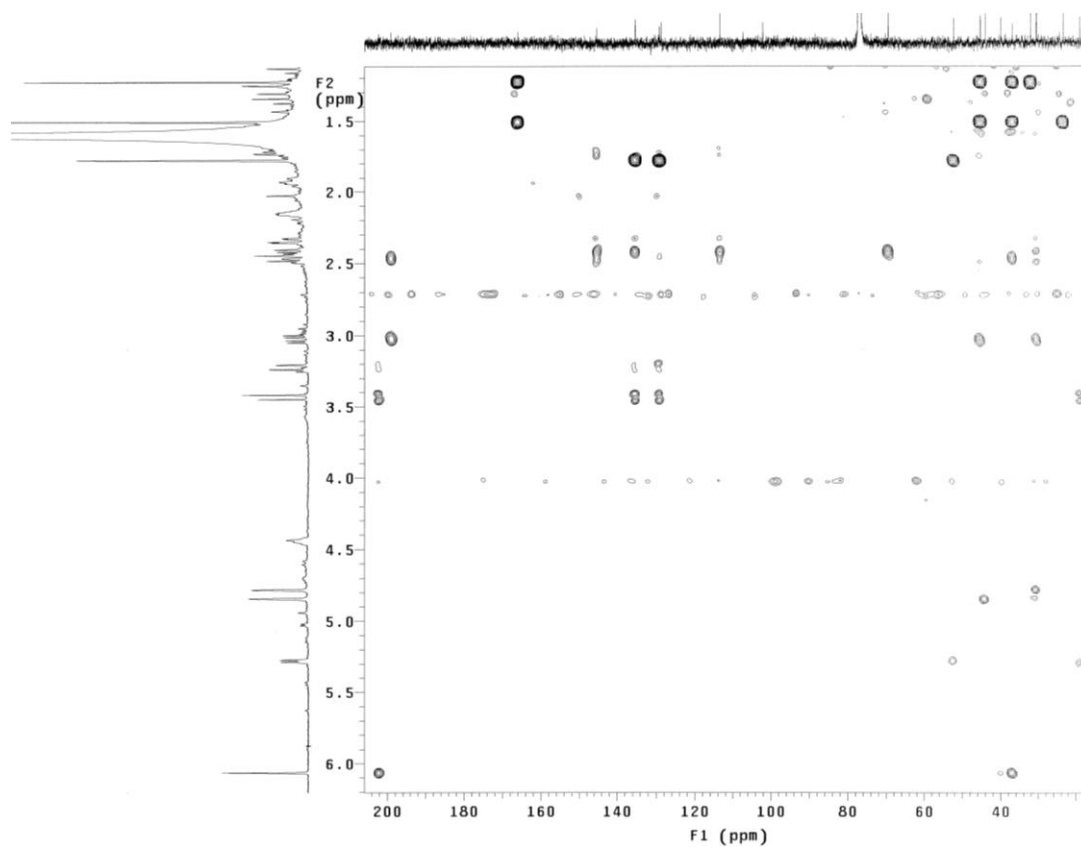

**Figure S83.** HMBC spectrum of **12** in  $\text{CDCl}_3$

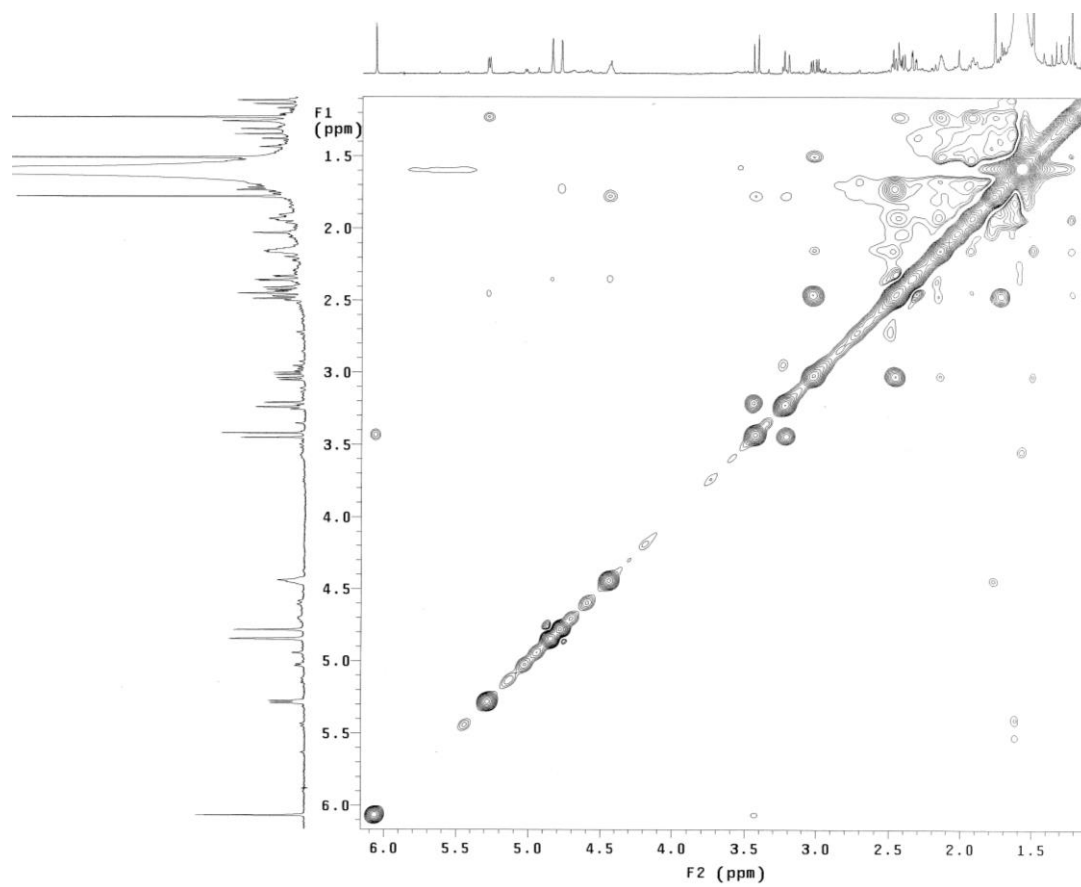

**Figure S84.** NOESY spectrum of **12** in  $\text{CDCl}_3$

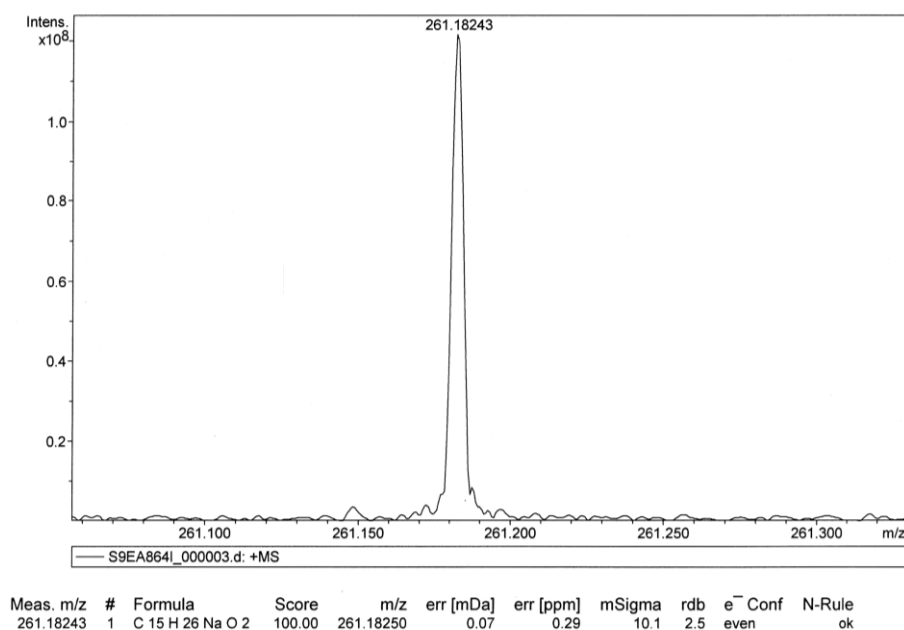

**Figure S85.** HRESIMS spectrum of **13**

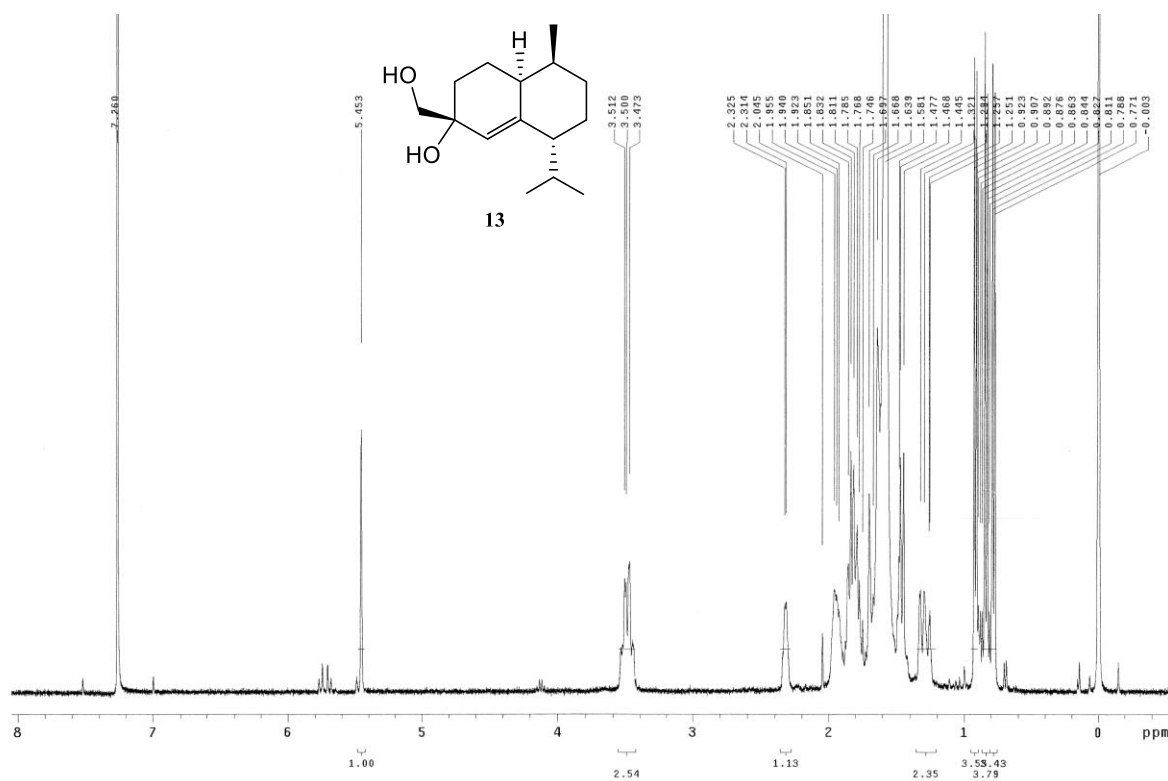

**Figure S86.** <sup>1</sup>H NMR spectrum of **13** in CDCl<sub>3</sub> at 400 MHz



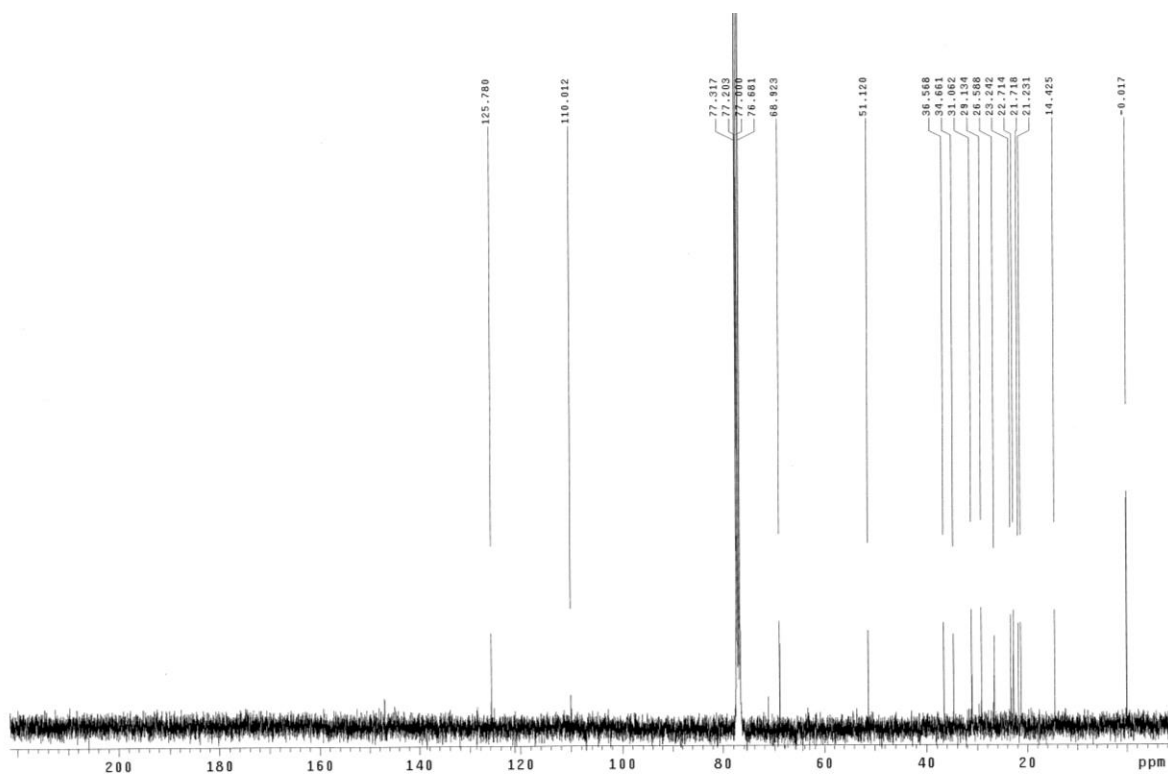

Figure S87.  $^{13}\text{C}$  NMR spectrum of **13** in  $\text{CDCl}_3$  at 100 MHz

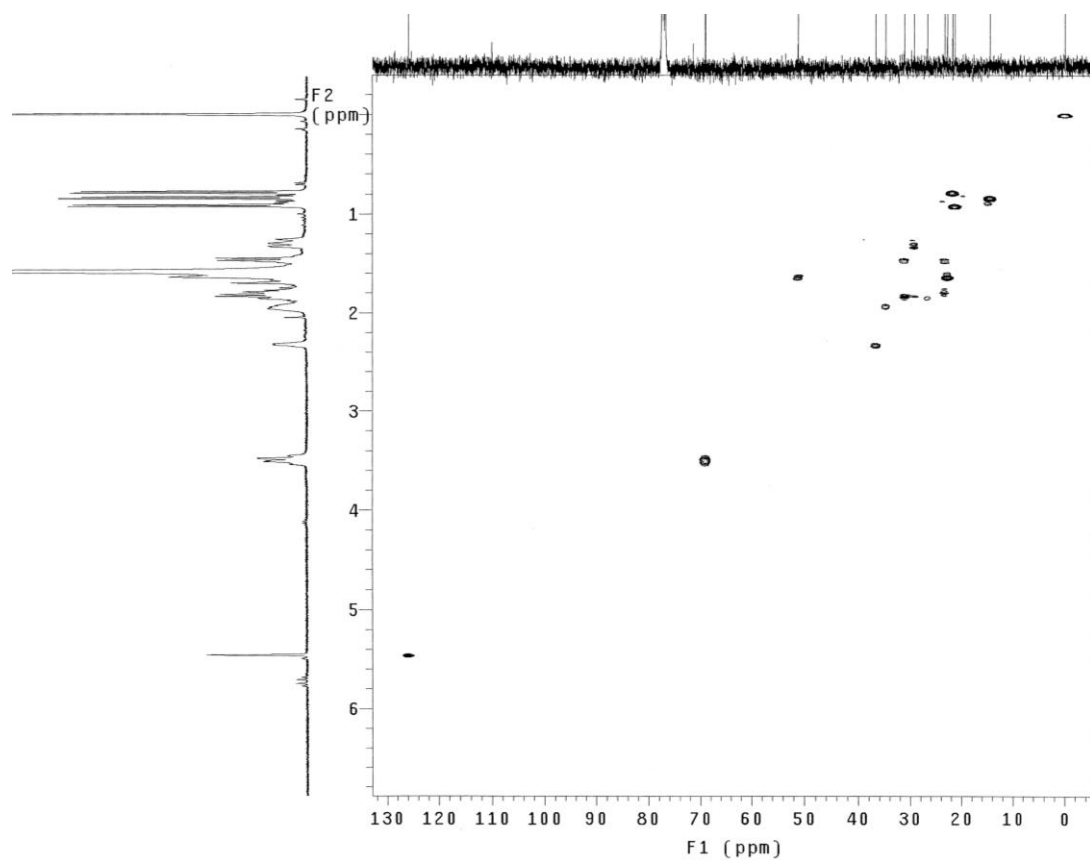

Figure S88. HSQC spectrum of **13** in  $\text{CDCl}_3$

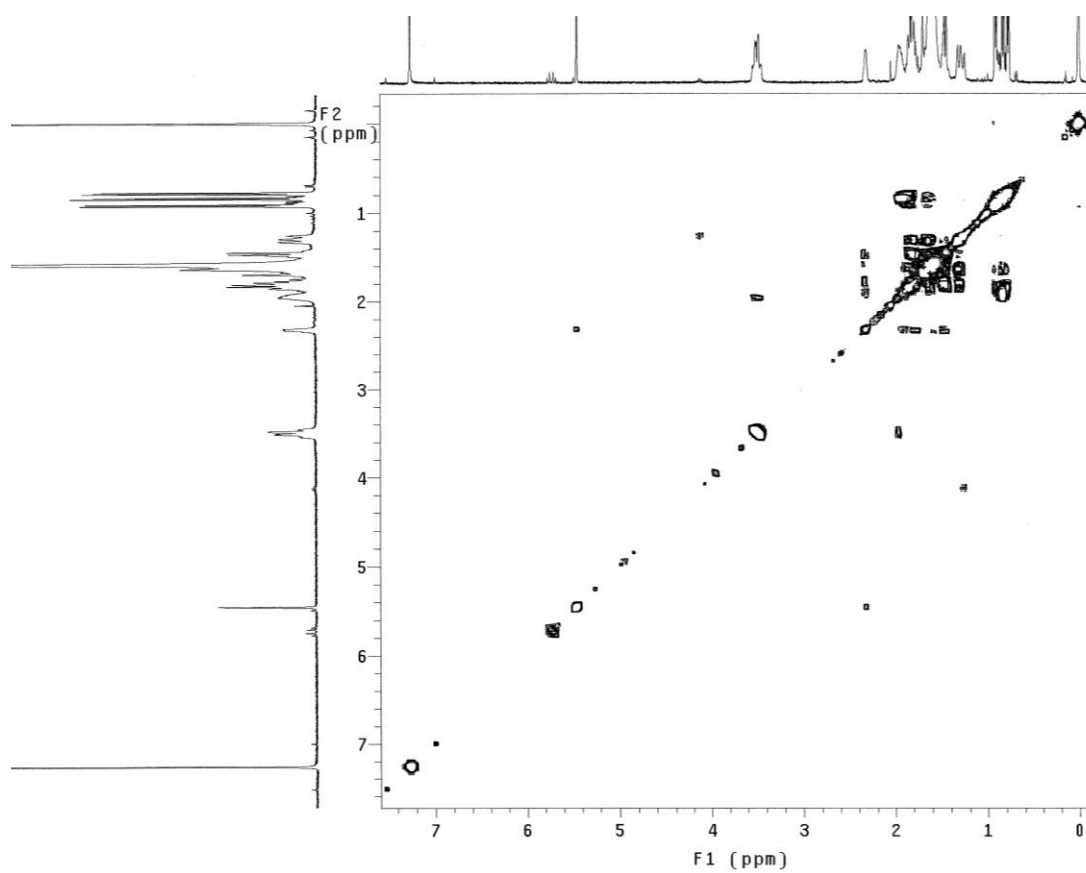

**Figure S89.** COSY spectrum of **13** in  $\text{CDCl}_3$

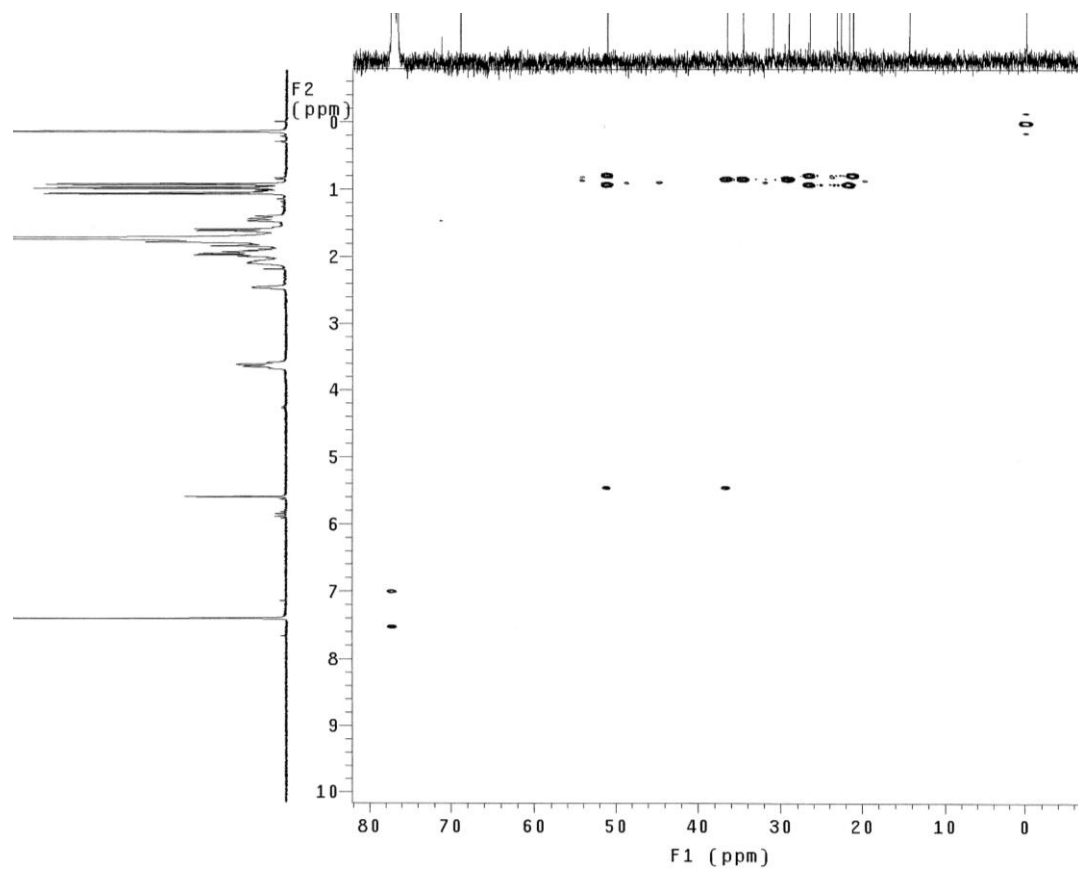

**Figure S90.** HMBC spectrum of **13** in  $\text{CDCl}_3$

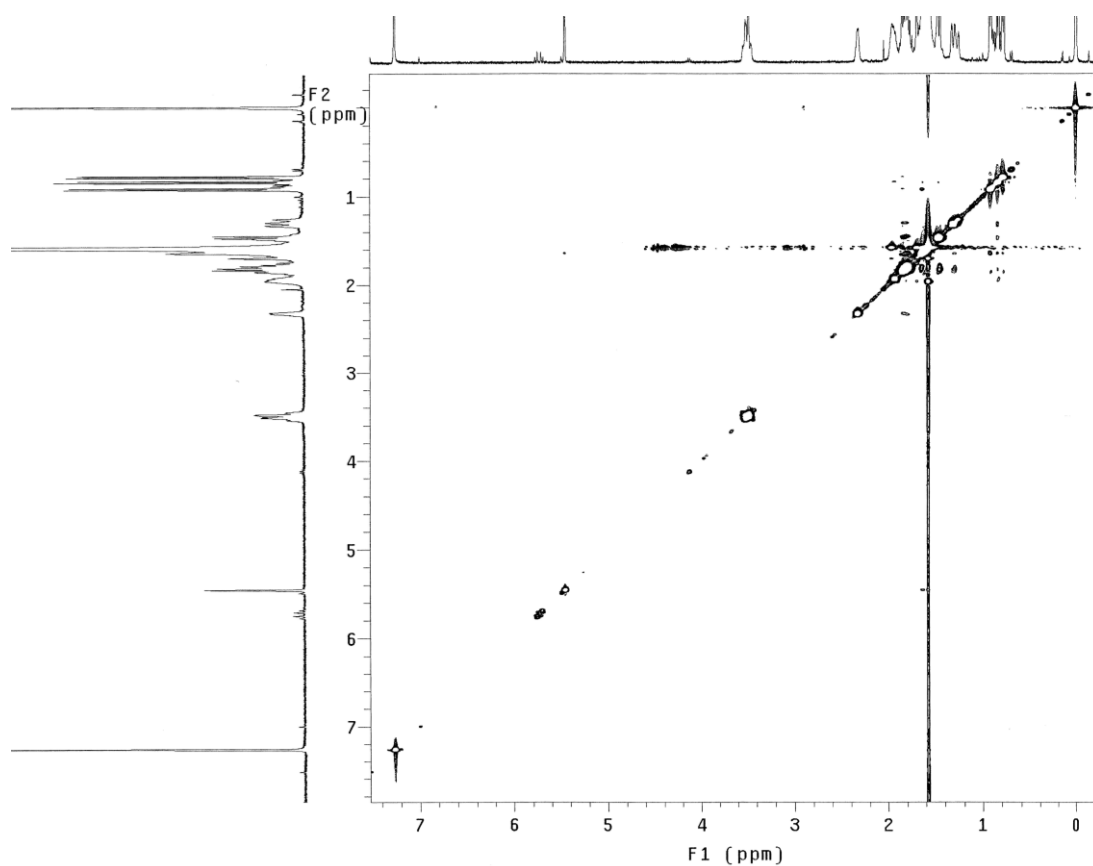

**Figure S91.** NOESY spectrum of **13** in  $\text{CDCl}_3$

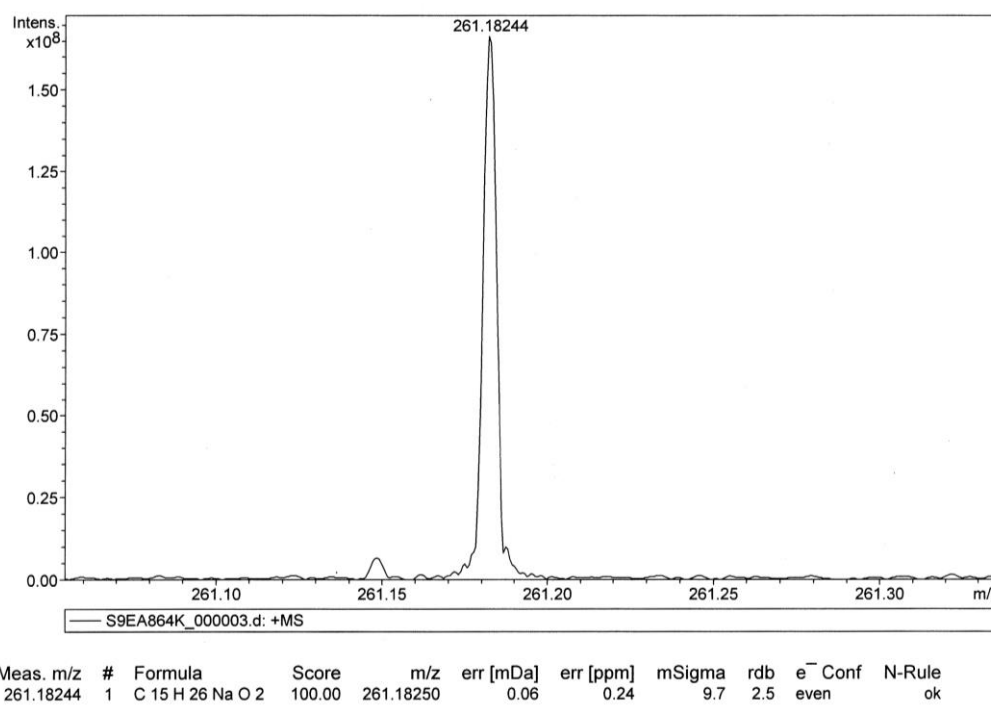

**Figure S92.** HRESIMS spectrum of **14**

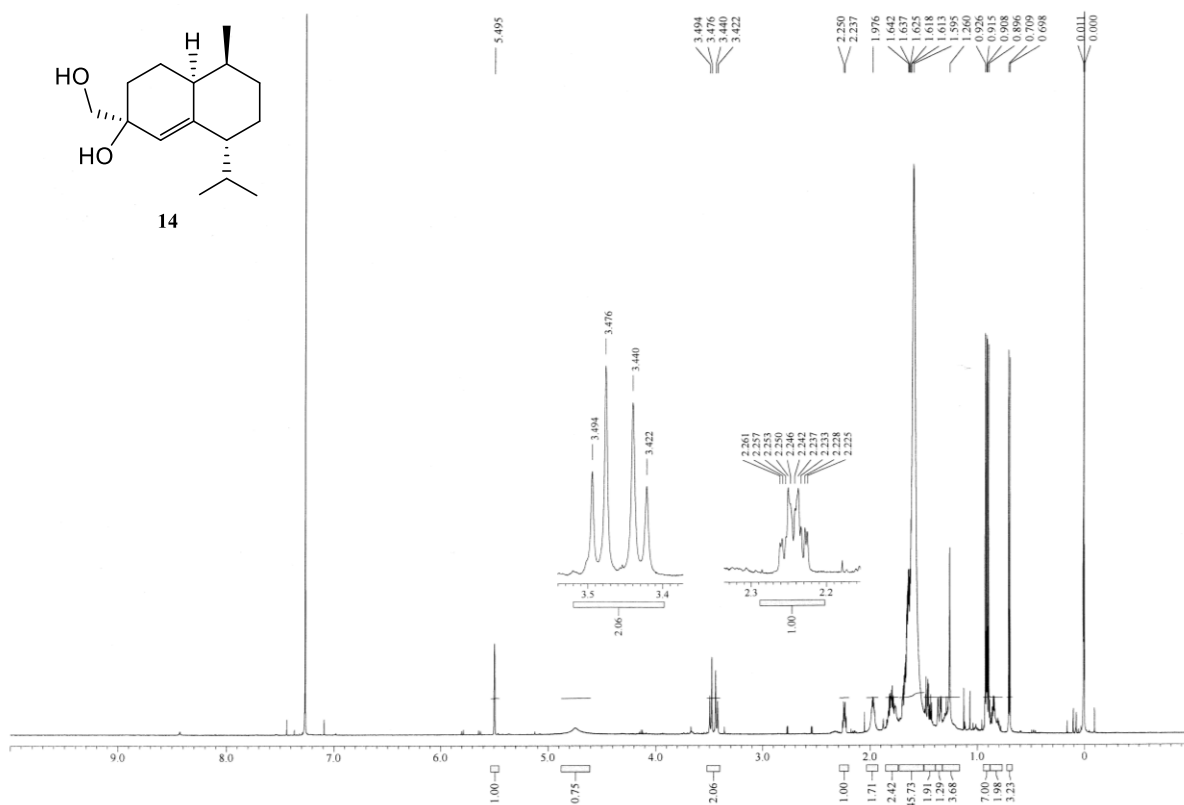

Figure S93. <sup>1</sup>H NMR spectrum of **14** in CDCl<sub>3</sub> at 600 MHz

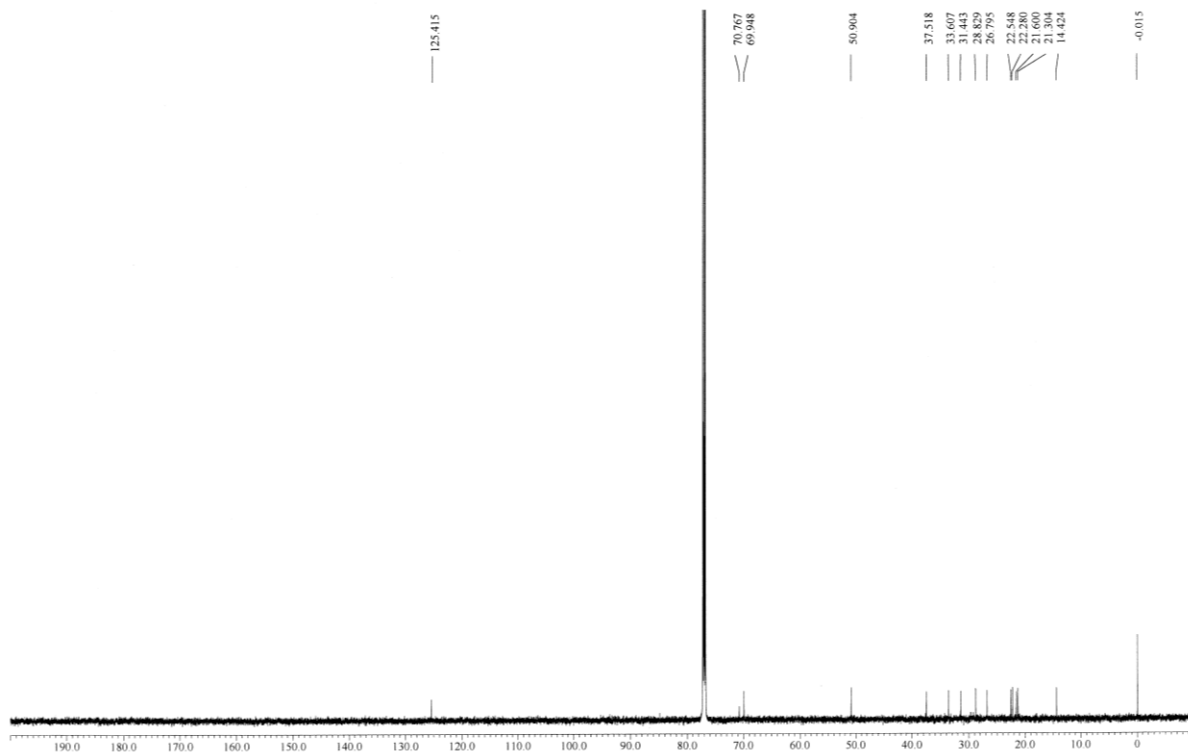

Figure S94. <sup>13</sup>C NMR spectrum of **14** in CDCl<sub>3</sub> at 150 MHz

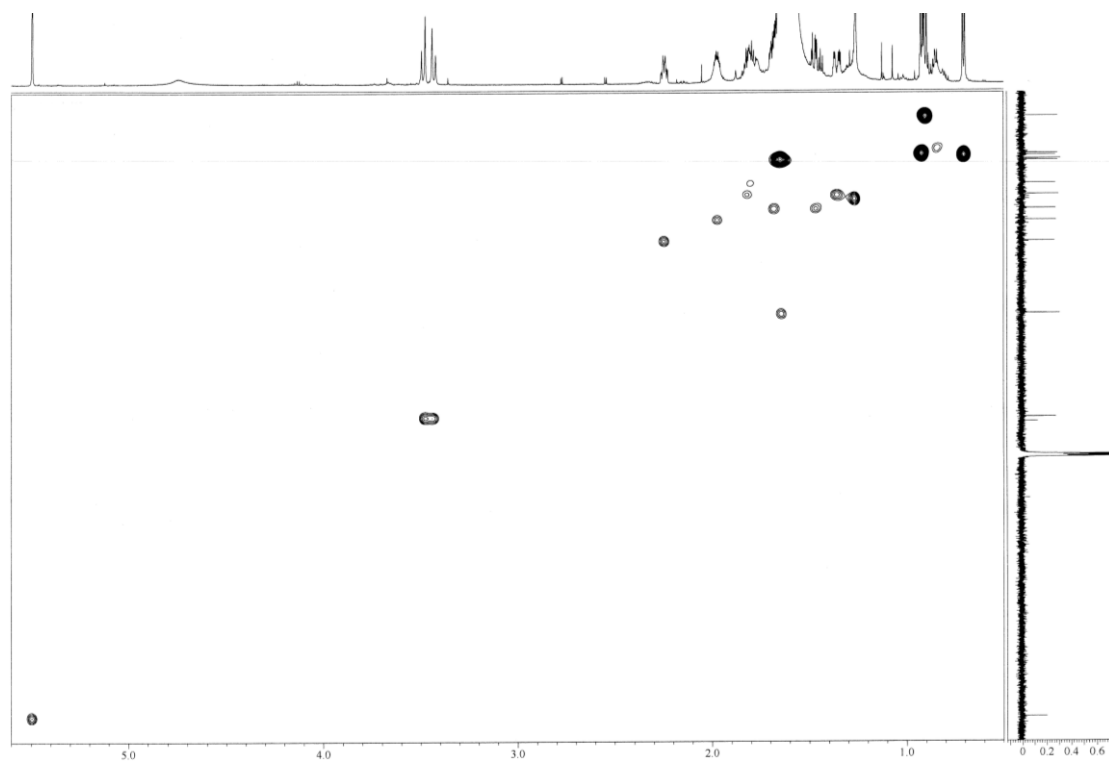

Figure S95. HSQC spectrum of **14** in CDCl<sub>3</sub>

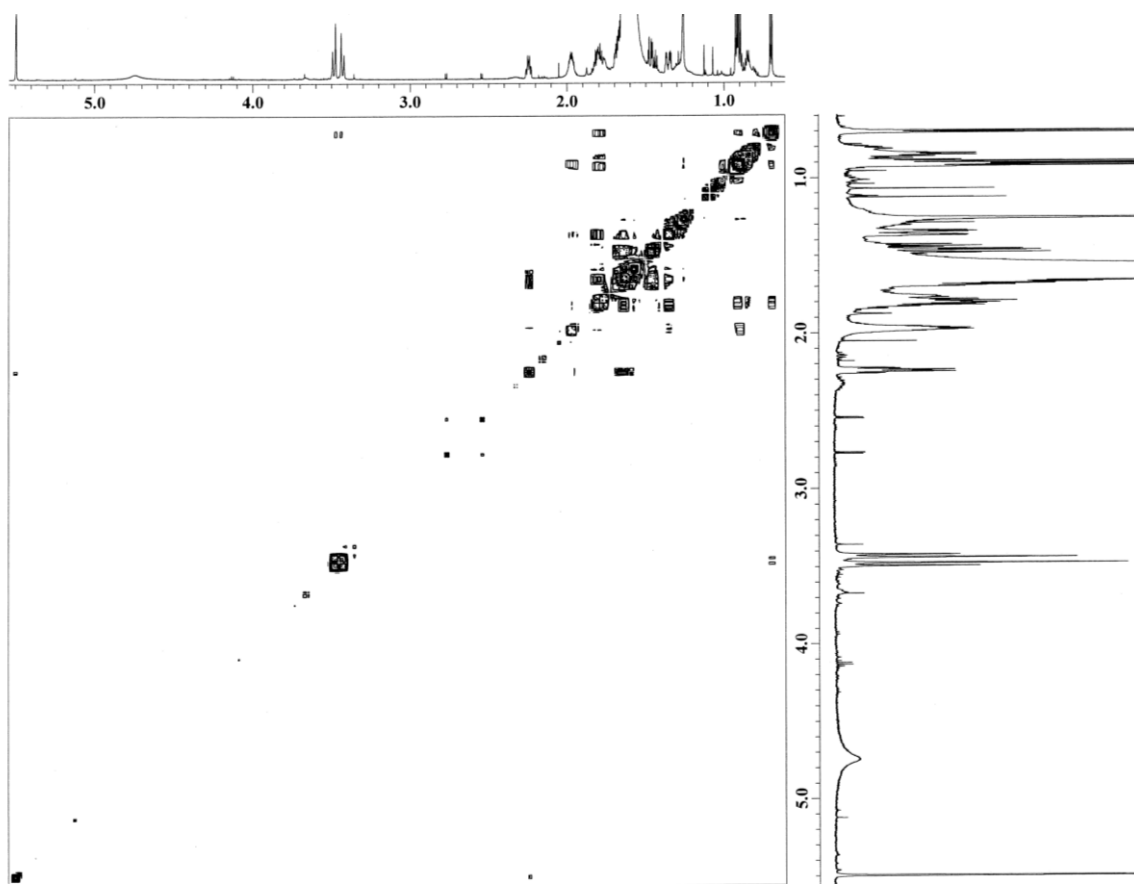

Figure S96. COSY spectrum of **14** in CDCl<sub>3</sub>

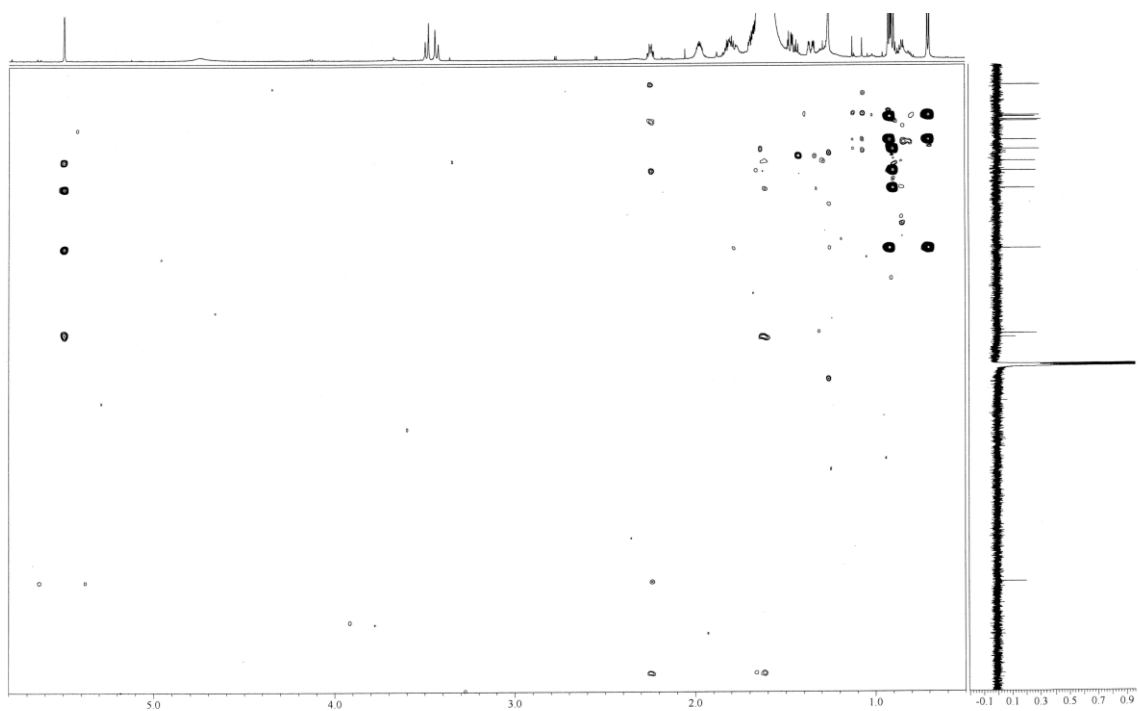

Figure S97. HMBC spectrum of **14** in CDCl<sub>3</sub>

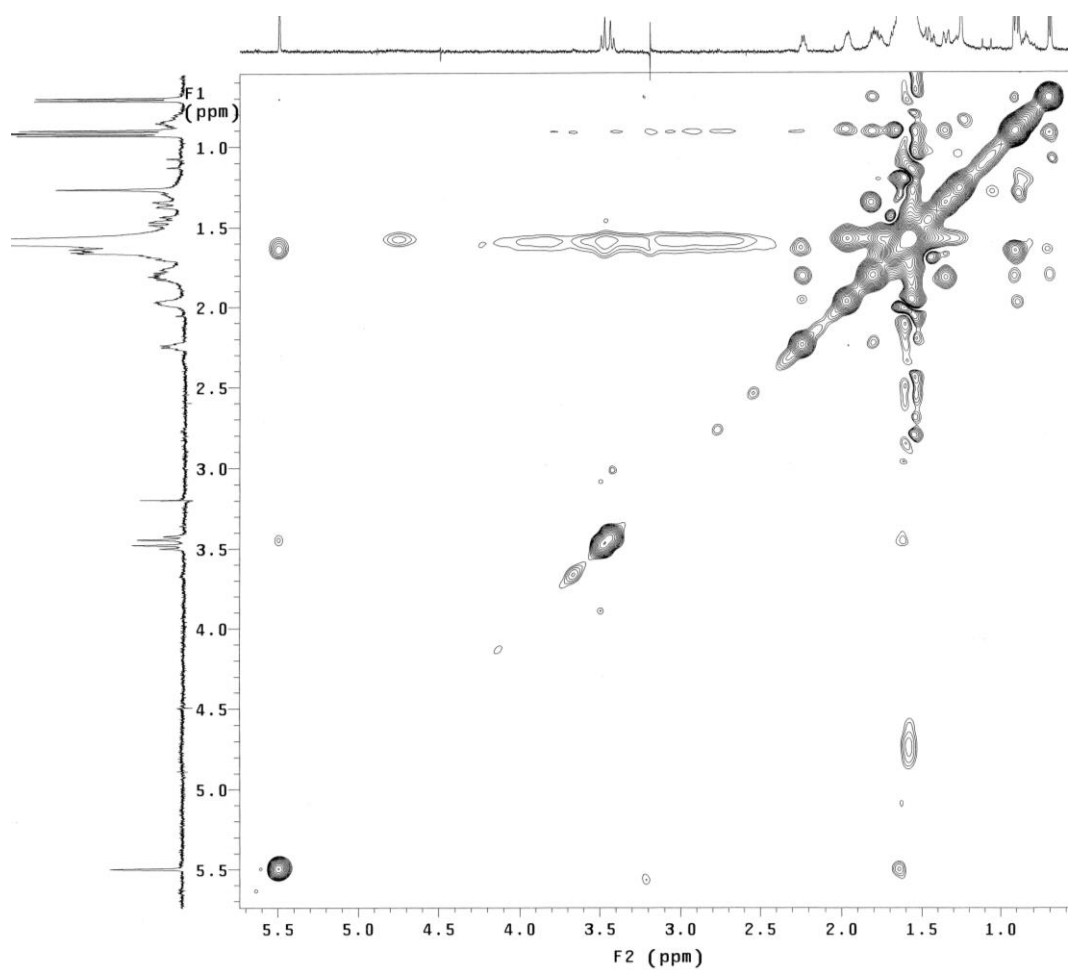

Figure S98. NOESY spectrum of **14** in CDCl<sub>3</sub>

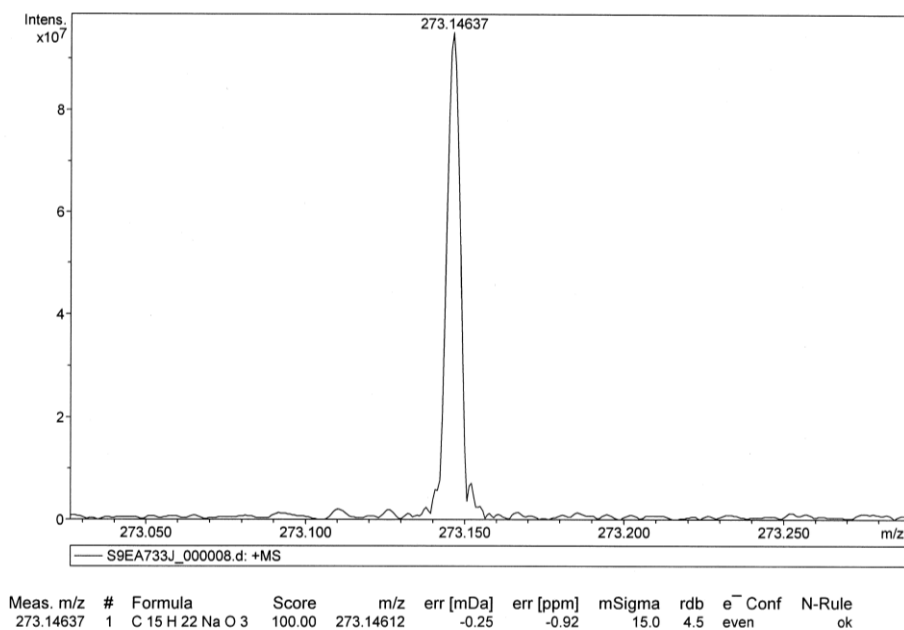

Figure S99. HRESIMS spectrum of **15**

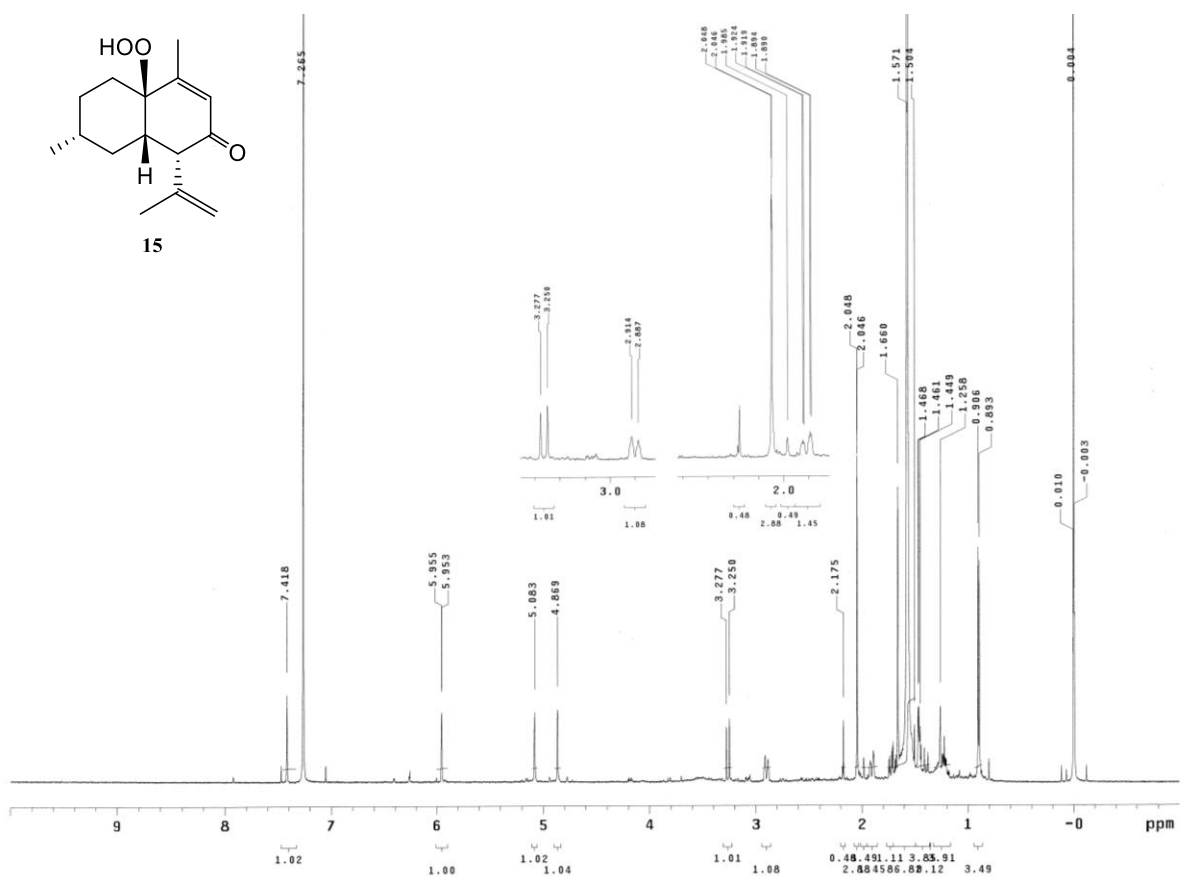

Figure S100. <sup>1</sup>H NMR spectrum of **15** in CDCl<sub>3</sub> at 500 MHz

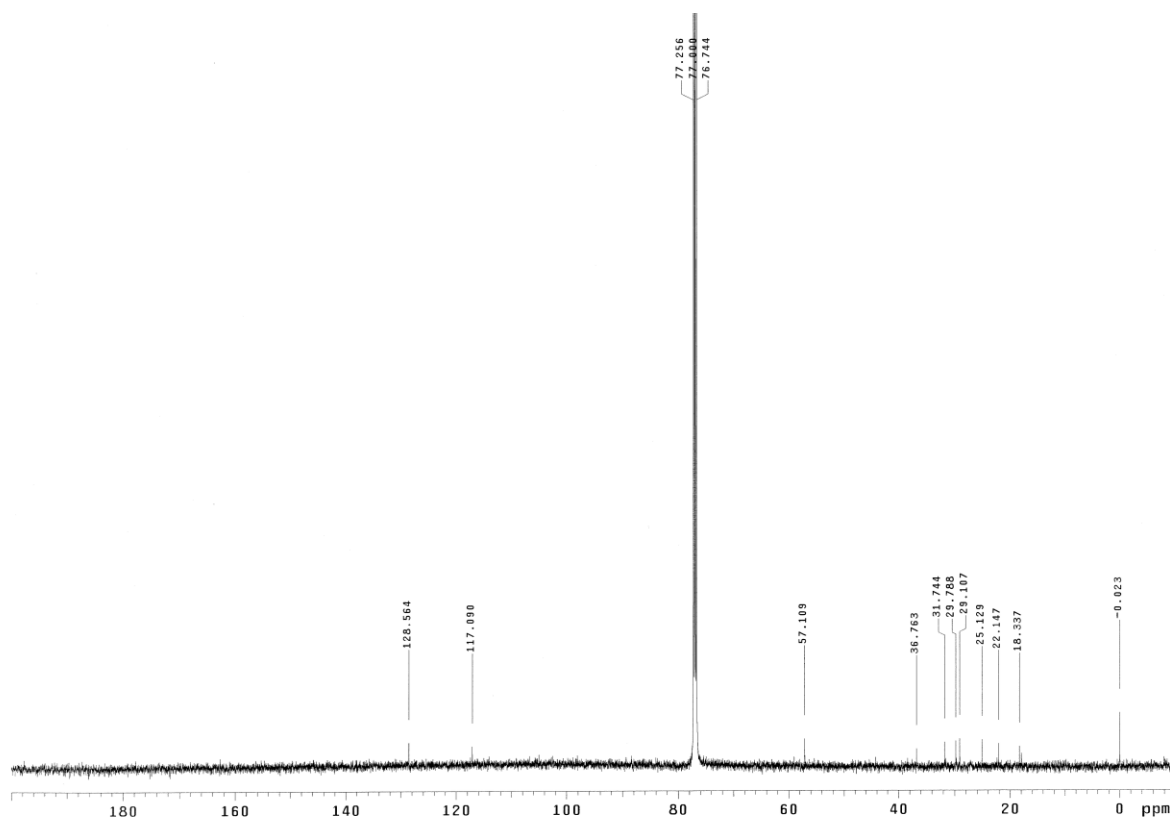

Figure S101.  $^{13}\text{C}$  NMR spectrum of **15** in  $\text{CDCl}_3$  at 125 MHz

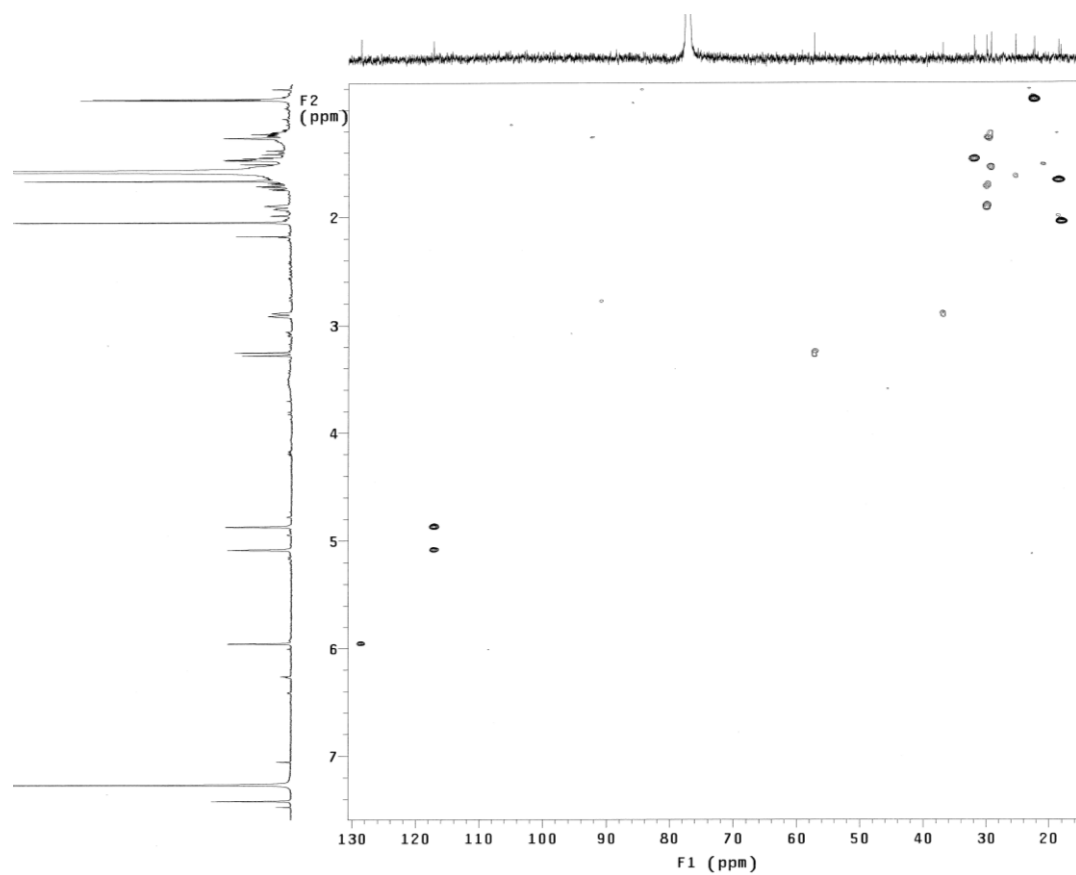

Figure S102. HSQC spectrum of **15** in  $\text{CDCl}_3$



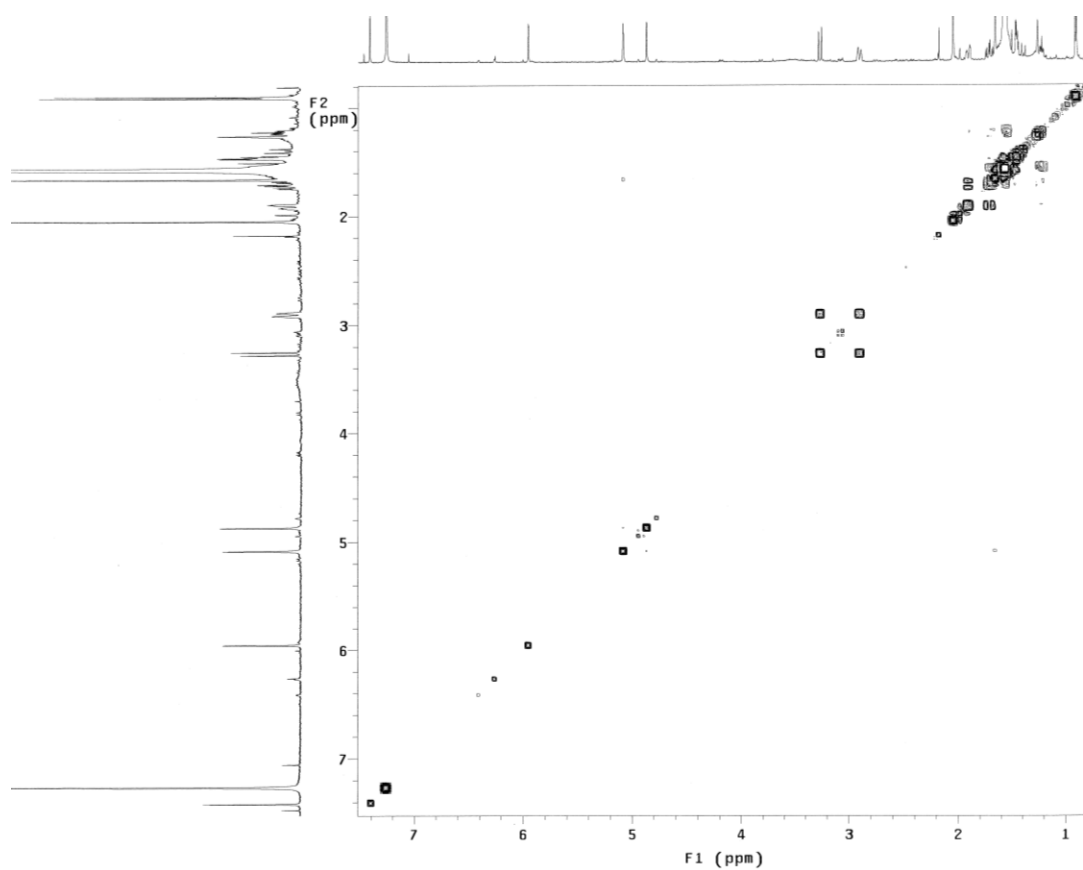

**Figure S103.** COSY spectrum of **15** in  $\text{CDCl}_3$

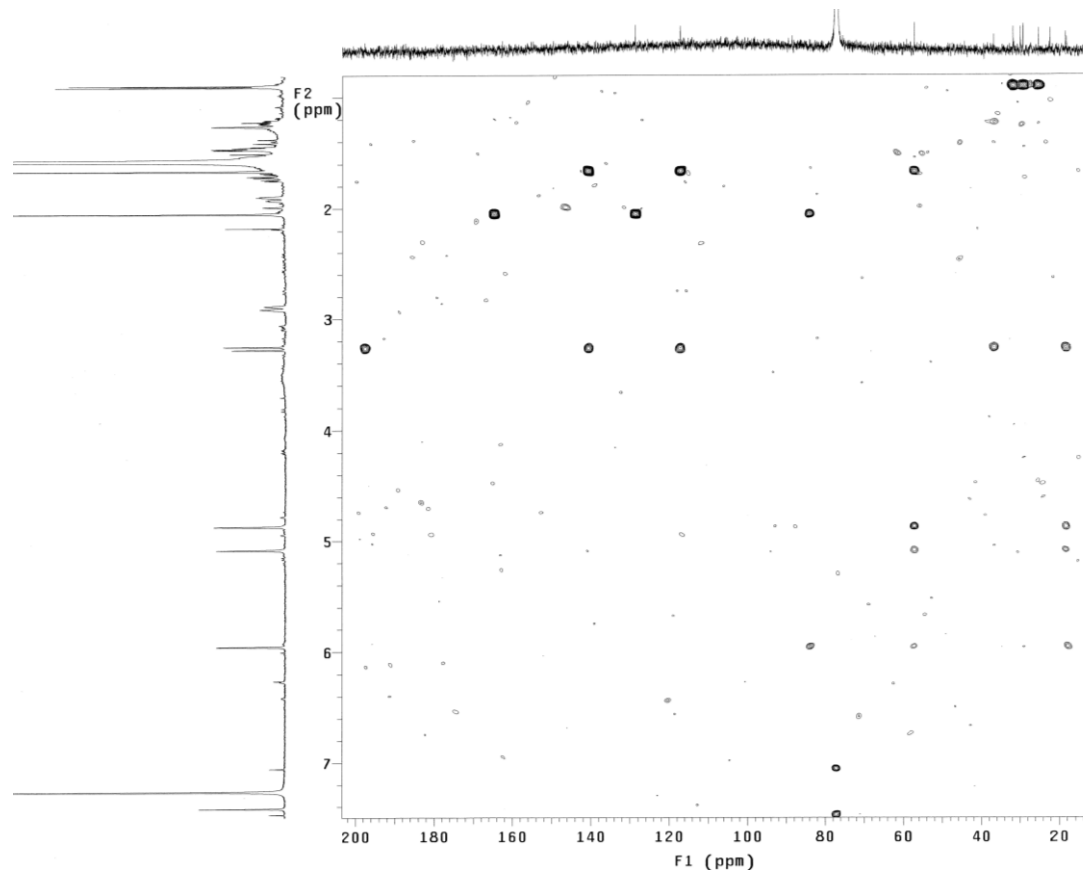

**Figure S104.** HMBC spectrum of **15** in  $\text{CDCl}_3$

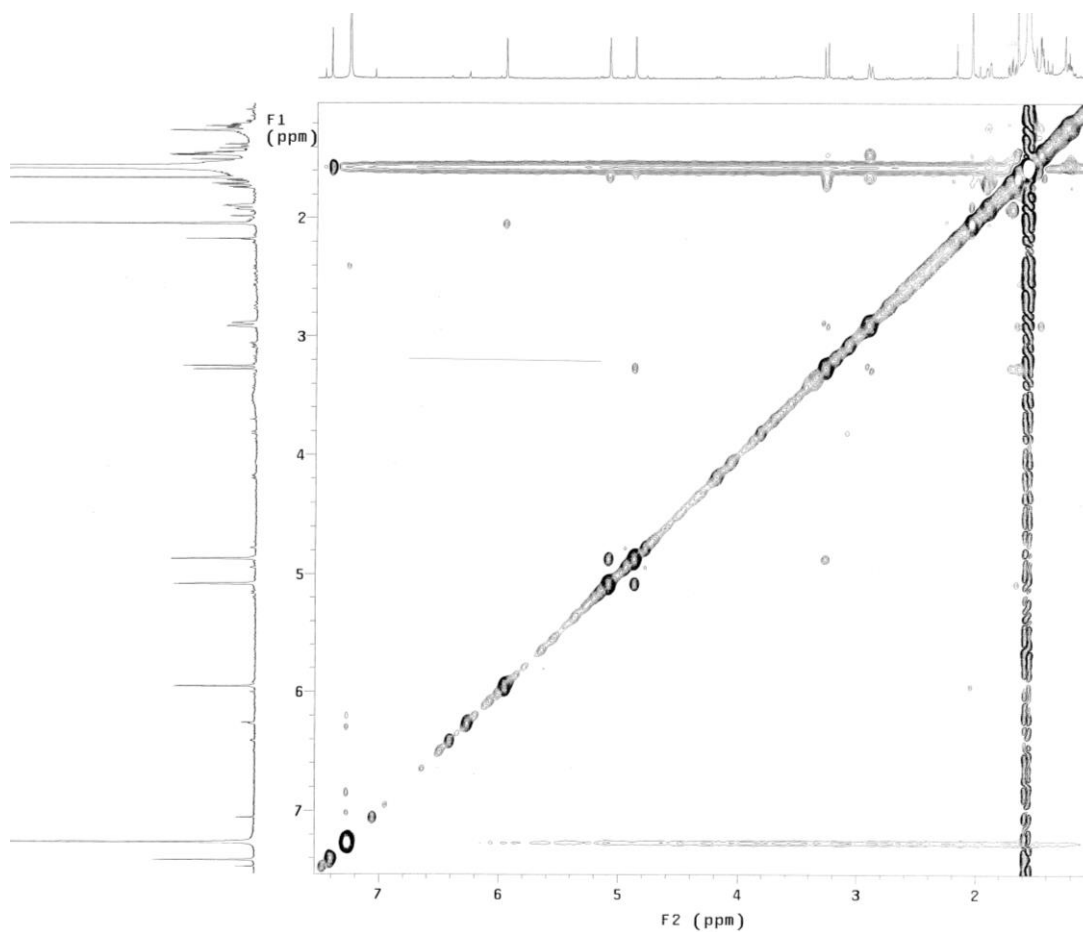

Figure S105. NOESY spectrum of **15** in CDCl<sub>3</sub>

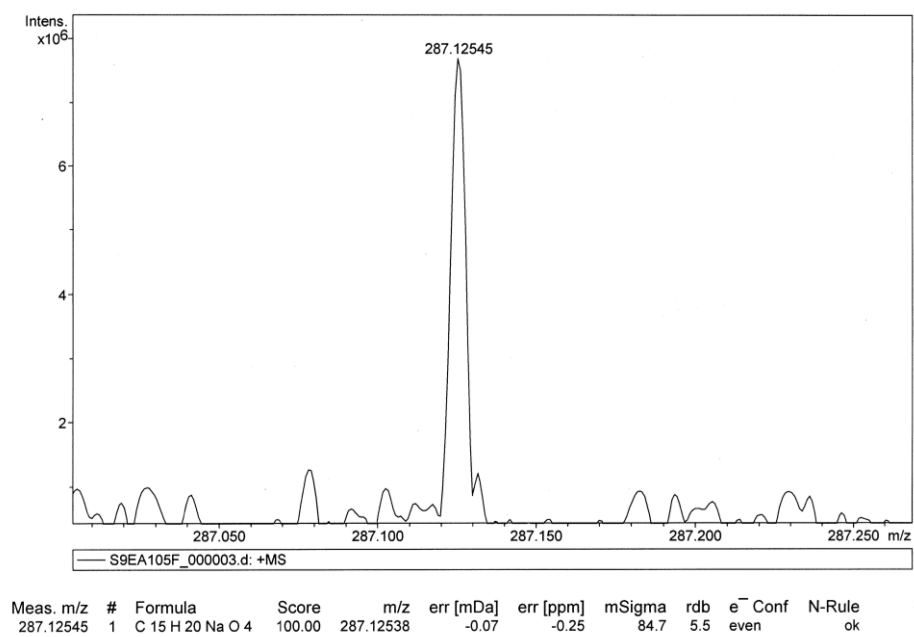

Figure S106. HRESIMS spectrum of **16**

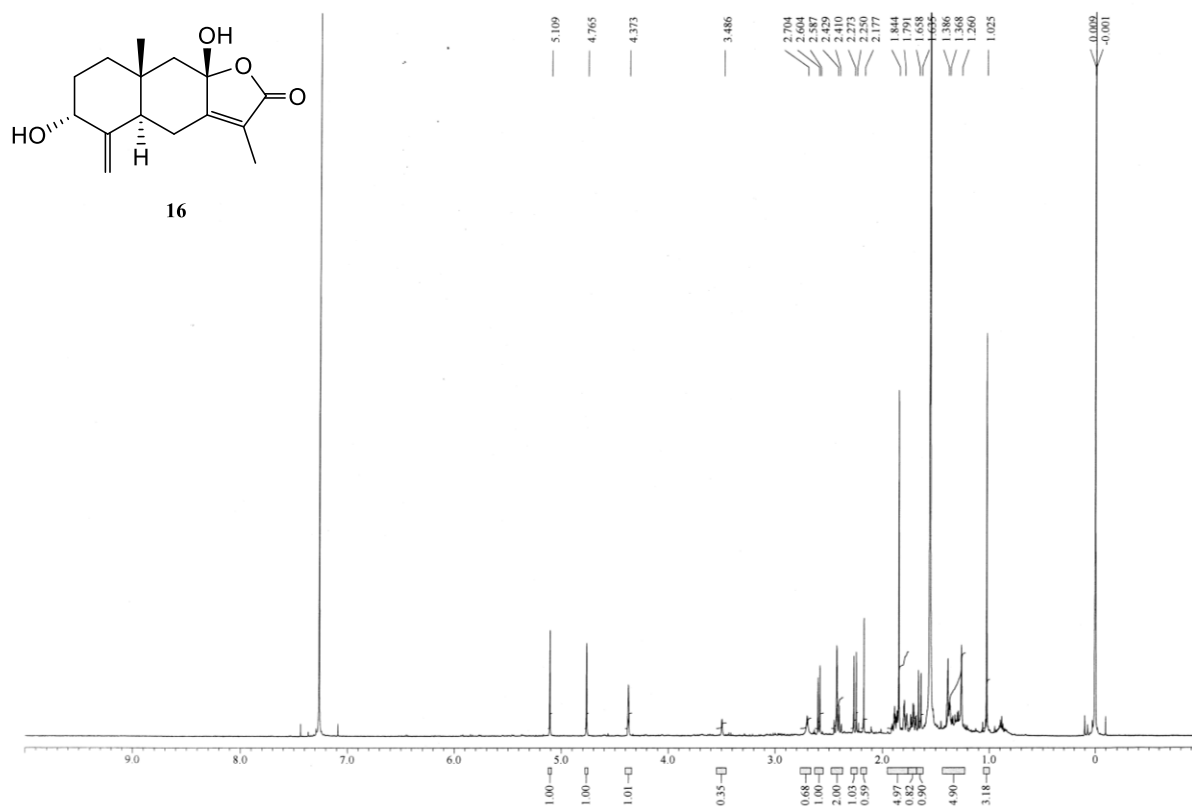

Figure S107. <sup>1</sup>H NMR spectrum of **16** in CDCl<sub>3</sub> at 600 MHz

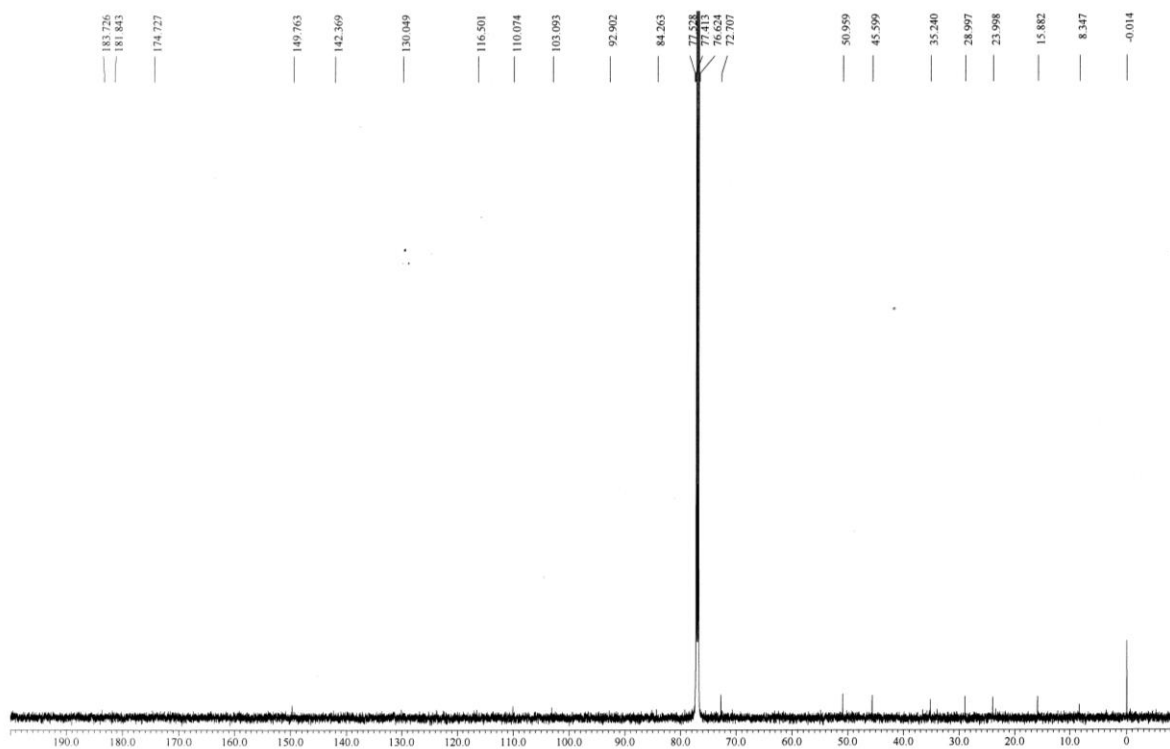

Figure S108. <sup>13</sup>C NMR spectrum of **16** in CDCl<sub>3</sub> at 150 MHz

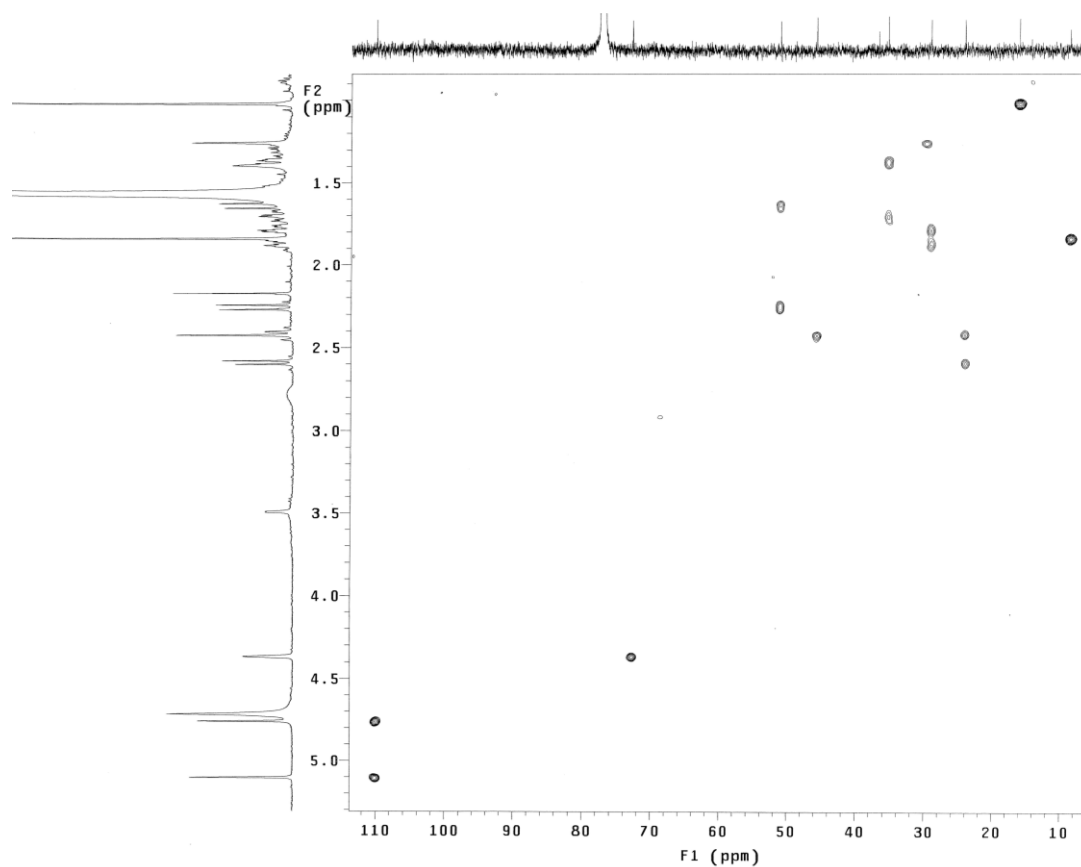

**Figure S109.** HSQC spectrum of **16** in CDCl<sub>3</sub>

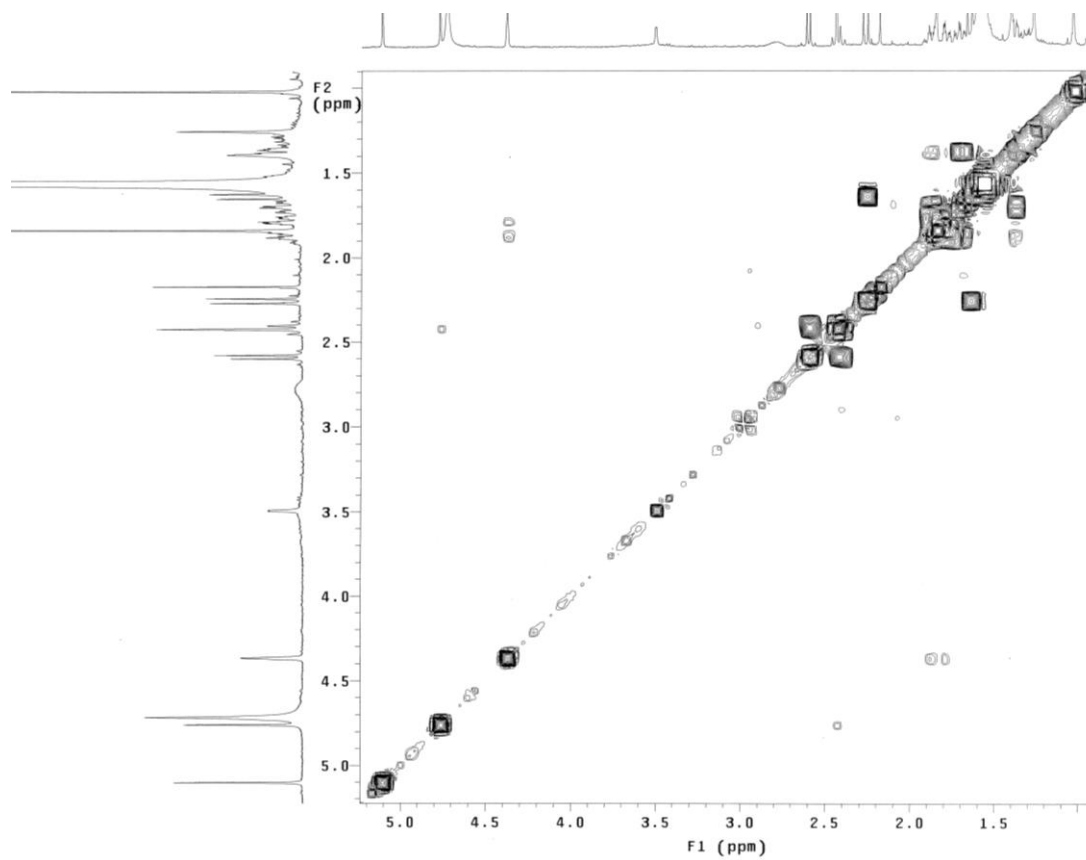

**Figure S110.** COSY spectrum of **16** in CDCl<sub>3</sub>

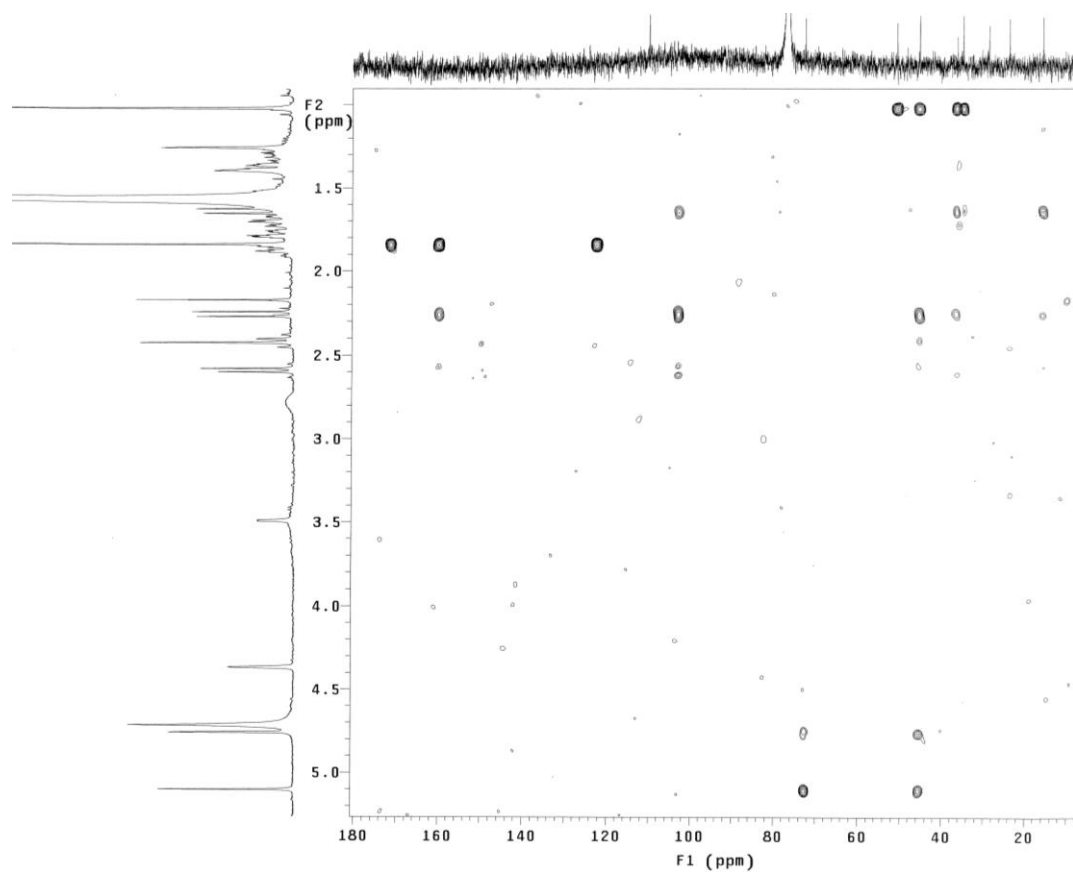

**Figure S111.** HMBC spectrum of **16** in  $\text{CDCl}_3$

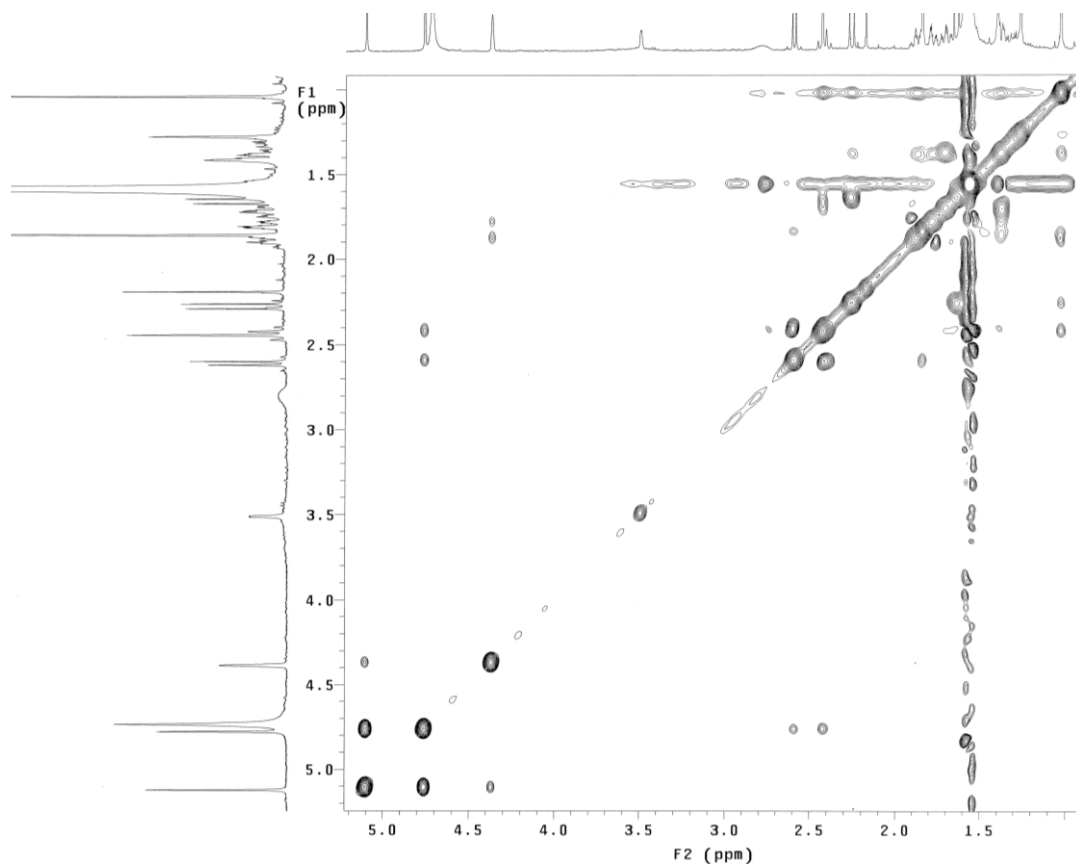

**Figure S112.** NOESY spectrum of **16** in  $\text{CDCl}_3$

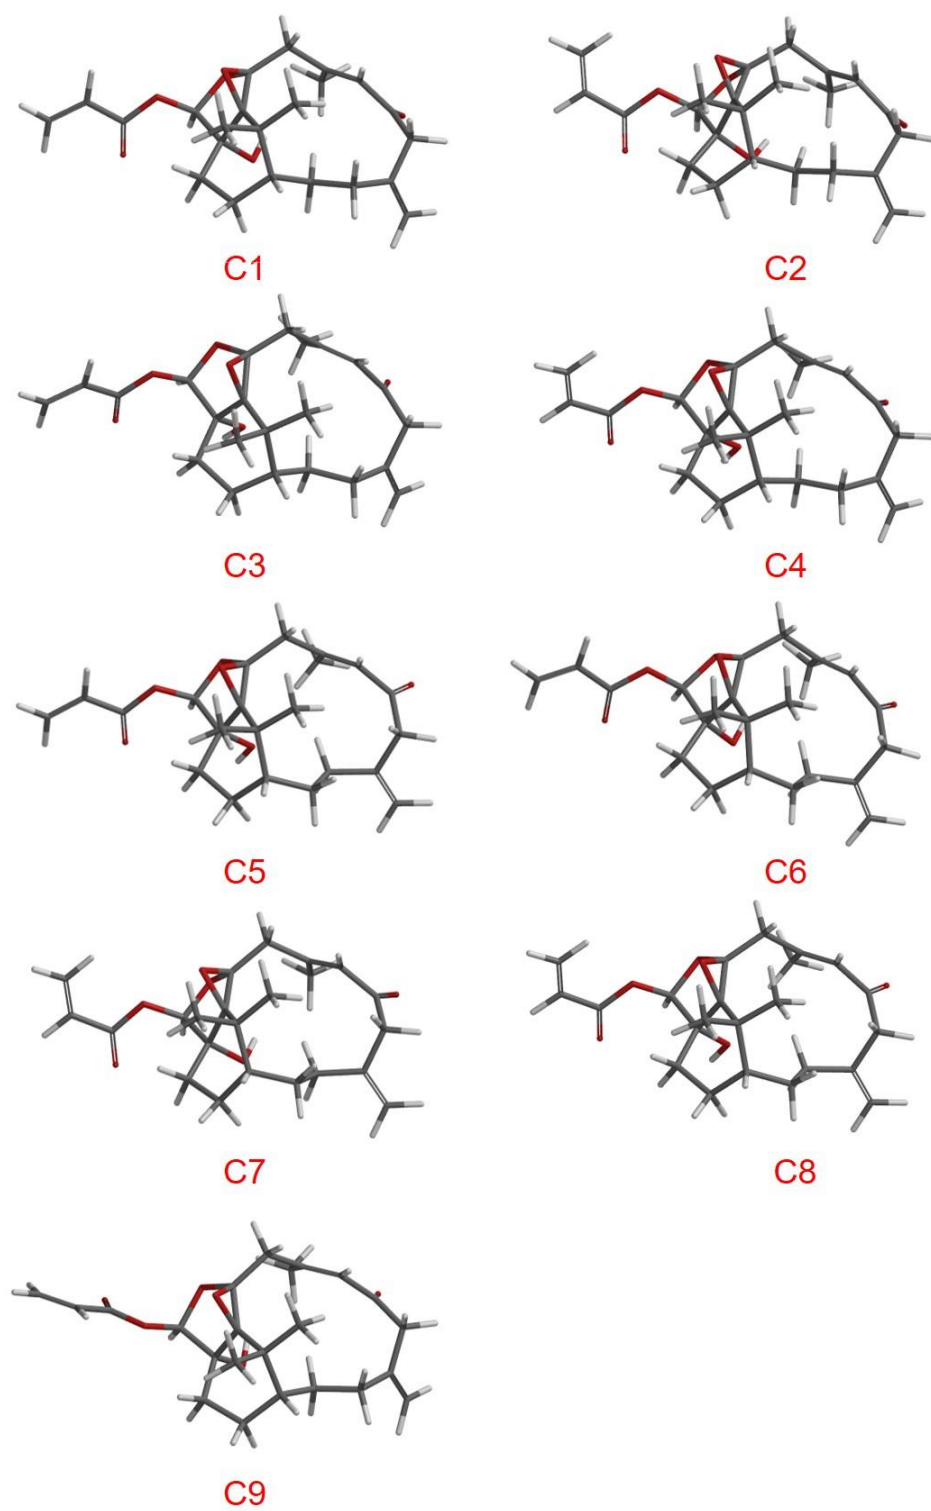

**Figure S113.** MMFF lowest energy conformers for **1**.

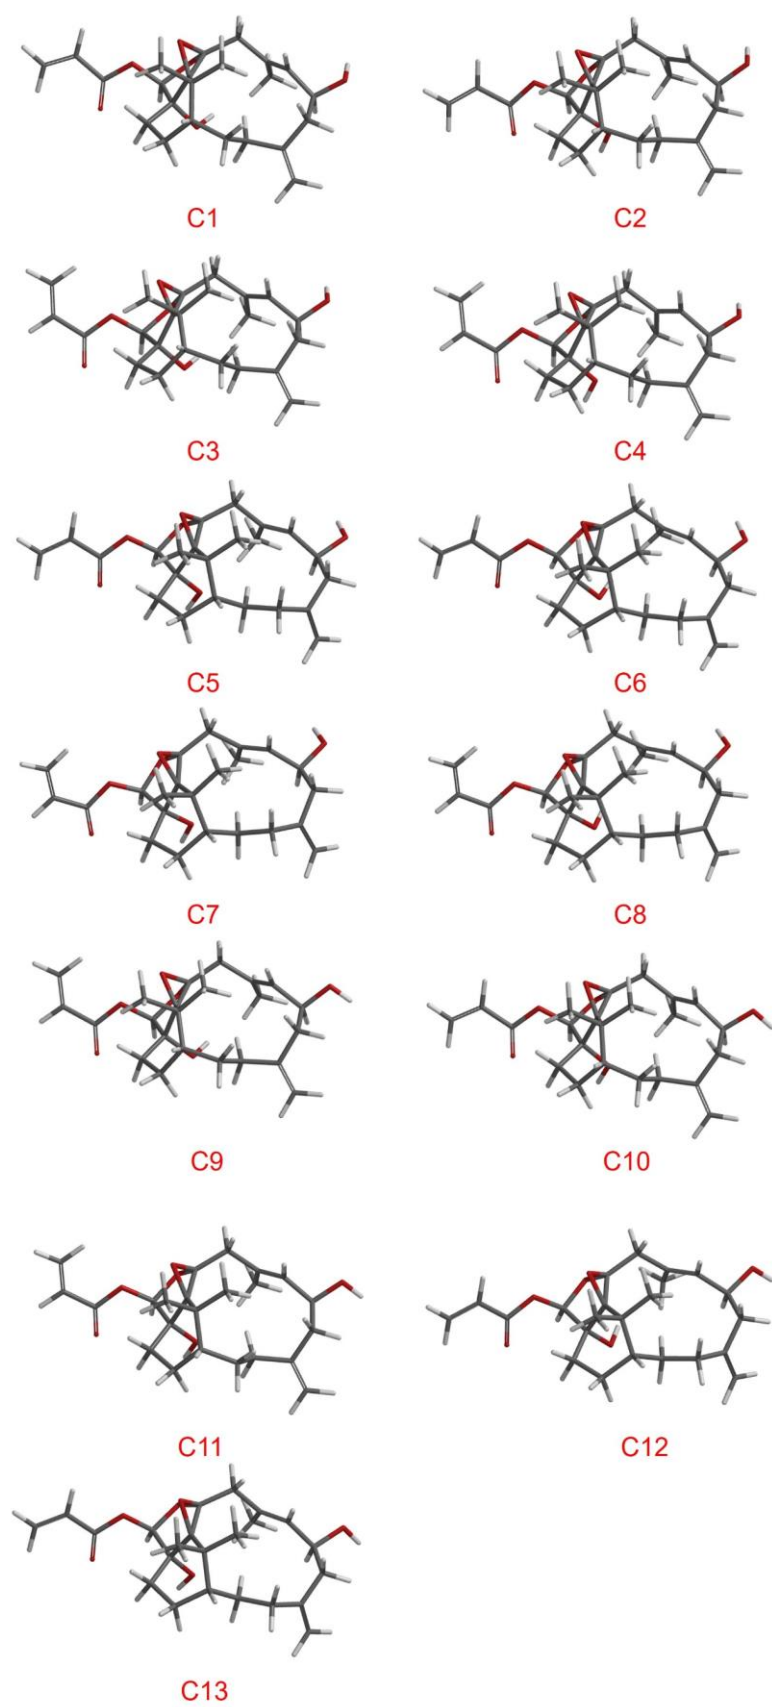

**Figure S114.** MMFF lowest energy conformers for **2**.

**Table S1.** <sup>1</sup>H and <sup>13</sup>C NMR spectroscopic data of compounds **17** and **18**.

| No. | <b>17</b>                         |                              | <b>18</b>                   |                              |
|-----|-----------------------------------|------------------------------|-----------------------------|------------------------------|
|     | <sup>1</sup> H <sup>1</sup>       | <sup>13</sup> C <sup>2</sup> | <sup>1</sup> H <sup>3</sup> | <sup>13</sup> C <sup>4</sup> |
| 1   | 1.91, m                           | 43.0 (CH) <sup>6</sup>       | 1.63, m                     | 43.0 (CH) <sup>6</sup>       |
| 2   | 1.66, m; 1.57, m                  | 29.0 (CH <sub>2</sub> )      | 1.95, m; 1.52, m            | 30.6 (CH <sub>2</sub> )      |
| 3   | 1.99, m; 1.84 m                   | 33.5 (CH <sub>2</sub> )      | 2.69, t (12.8) <sup>5</sup> | 30.6 (CH <sub>2</sub> )      |
|     |                                   |                              | 1.91, m                     |                              |
| 4   |                                   | 146.2 (C)                    |                             | 147.0 (C)                    |
| 5   | 2.49, dd (13.5, 2.5) <sup>5</sup> | 44.3 (CH <sub>2</sub> )      | 2.46, dd (12.8, 2.4)        | 44.7 (CH <sub>2</sub> )      |
|     | 2.29, dd (13.5, 9.0)              |                              | 2.30, dd (12.8, 7.6)        |                              |
| 6   | 4.48, t (9.0)                     | 68.7 (CH)                    | 4.44, d (6.0)               | 69.2 (CH)                    |
| 7   | 5.40, d (9.0)                     | 134.4 (CH)                   | 5.13, d (7.6)               | 131.1 (CH)                   |
| 8   |                                   | 130.5 (C)                    |                             | 130.8 (C)                    |
| 9   | 3.23, d (13.5)                    | 46.3 (CH <sub>2</sub> )      | 3.43, d (15.6)              | 51.0 (CH <sub>2</sub> )      |
|     | 2.86, d (13.5)                    |                              | 3.04, d (15.6)              |                              |
| 10  |                                   | 169.7 (C)                    |                             | 202.2 (C)                    |
| 11  |                                   | 211.1 (C)                    |                             | 147.9 (C)                    |
| 12  | 5.08, dd (6.0, 4.0)               | 72.2 (CH)                    | 6.21, br s                  | 135.5 (CH)                   |
| 13  | 2.40, dt (22.0, 7.0)              | 26.4 (CH <sub>2</sub> )      | 2.29, 2H, m                 | 23.9 (CH <sub>2</sub> )      |
|     | 1.89, m                           |                              |                             |                              |
| 14  | 1.97, m; 1.65, m                  | 20.4 (CH <sub>2</sub> )      | 2.24, m; 1.66, m            | 22.9 (CH <sub>2</sub> )      |
| 15  |                                   | 47.6 (C)                     |                             | 35.3 (C)                     |
| 16  | 1.23, 3H, s                       | 27.8 (CH <sub>3</sub> )      | 1.28, 3H, s                 | 32.8 (CH <sub>3</sub> )      |
| 17  | 1.17, 3H, s                       | 23.1 (CH <sub>3</sub> )      | 1.15, 3H, s                 | 24.5 (CH <sub>3</sub> )      |
| 18  | 4.87, 4.85, both s                | 112.2 (CH <sub>2</sub> )     | 4.84, 4.81, both s          | 112.6 (CH <sub>2</sub> )     |
| 19  | 1.74, 3H, s                       | 16.9 (CH <sub>3</sub> )      | 1.75, 3H, s                 | 18.9 (CH <sub>3</sub> )      |

<sup>1</sup> Spectrum recorded at 500 MHz in CDCl<sub>3</sub>.<sup>2</sup> Spectrum recorded at 125 MHz in CDCl<sub>3</sub>.<sup>3</sup> Spectrum recorded at 400 MHz in CDCl<sub>3</sub>.<sup>4</sup> Spectrum recorded at 100 MHz in CDCl<sub>3</sub>.<sup>5</sup> J values are in Hz.<sup>6</sup> Attached protons were deduced by HSQC experiments**Table S2.** Energy analysis for MMFF conformational searching of compounds **1** and **2**

| Conf. | <b>1</b>          |                 | <b>2</b>          |                 |
|-------|-------------------|-----------------|-------------------|-----------------|
|       | rel. E (kcal/mol) | Boltzmann Dist. | rel. E (kcal/mol) | Boltzmann Dist. |
| C1    | 0.00              | 0.223           | 0.00              | 0.261           |
| C2    | 0.31              | 0.133           | 0.30              | 0.156           |
| C3    | 0.33              | 0.127           | 0.96              | 0.052           |
| C4    | 0.71              | 0.067           | 1.16              | 0.037           |
| C5    | 1.08              | 0.036           | 1.21              | 0.034           |
| C6    | 1.11              | 0.034           | 1.48              | 0.021           |
| C7    | 1.40              | 0.021           | 1.59              | 0.018           |
| C8    | 1.45              | 0.019           | 1.80              | 0.013           |
| C9    | 1.83              | 0.010           | 2.07              | 0.008           |
| C10   |                   |                 | 2.18              | 0.007           |
| C11   |                   |                 | 2.56              | 0.003           |
| C12   |                   |                 | 2.81              | 0.002           |
| C13   |                   |                 | 2.99              | 0.002           |
